# Supplementary material for: Potential Diagnostic Value of the Differential Expression of Histone H3 Variants between Low- and High-Grade Gliomas
Source: Cancers (Basel). 2021 Oct 20;13(21):5261. doi: 10.3390/cancers13215261 (PMC8582563; doi:10.3390/cancers13215261)
Supplement: Supplementary file 1 [file cancers-13-05261-s001.zip]

Archive with 5 entries (5 files):
- Supplementary Information editable.pdf
- Table S1.xlsx
- Table S2.xlsx
- Table S3.xlsx
- Table S4.xlsx
