# Supplementary material for: Potential Diagnostic Value of the Differential Expression of Histone H3 Variants between Low- and High-Grade Gliomas
Source: Cancers (Basel). 2021 Oct 20;13(21):5261. doi: 10.3390/cancers13215261 (PMC8582563; doi:10.3390/cancers13215261)
Supplement: Supplementary file 1 [file cancers-13-05261-s001.zip › Table S1.xlsx]

## Sheet: Hoja1
Table S1. Clinical characteristics of the cohorts of patients used in the study.
The table indicates the assay used for each surgical resection: "Protein" for Western blot, "RNA" for RT-qPCR, "IHC" for immunohistochemistry.
Samples labeled with ' are recidivant tumours.
Patient	Age (years)	Gender	Histologic grade	Location (lobe)	Protein	RNA	IHC
1	30	Male	Diffuse astrocytoma (II)	Right frontal	✔		✔
2	47	Female	Diffuse astrocytoma (II)	Left frontal	✔
3	28	Male	Diffuse astrocytoma (II)	Right temporal	✔
4	41	Female	Diffuse astrocytoma (II)	Right fronto-parietal	✔
5'	36	Male	Anaplastic astrocytoma (III)	Right temporal	✔
6	52	Male	Anaplastic astrocytoma (III)	Right frontal	✔
7'	63	Male	Anaplastic astrocytoma (III)	Right frontal	✔
8	49	Male	Anaplastic astrocytoma (III)	Right frontal	✔
9	38	Female	Oligodendroglioma (II)	Left temporal	✔
10	44	Male	Oligodendroglioma (II)	Left frontal	✔		✔
11	58	Male	Oligodendroglioma (II)	Right frontal	✔
12	42	Male	Anaplastic oligodendroglioma (III)	Right frontal	✔
10'	47	Male	Anaplastic oligodendroglioma (III)	Left frontal	✔
13	68	Male	Glioblastoma (IV)	Right parietal	✔
14	67	Male	Glioblastoma (IV)	Left frontal	✔
15	69	Female	Glioblastoma (IV)	Left fronto-insular	✔
16	56	Male	Glioblastoma (IV)	Right frontal	✔
17	68	Male	Glioblastoma (IV)	Left temporal	✔
18	41	Female	Glioblastoma (IV)	Left temporo-occipital	✔
19	67	Female	Glioblastoma (IV)	Left parietal	✔		✔
20	44	Female	Glioblastoma (IV)	Right parietal	✔
21	70	Male	Glioblastoma (IV)	Left temporo-parietal	✔
22	47	Male	Glioblastoma (IV)	Right temporo-frontal	✔		✔
23	62	Male	Glioblastoma (IV)	Left fronto-parietal	✔
24	74	Female	Glioblastoma (IV)	Right temporal	✔
25	60	Female	Glioblastoma (IV)	Right temporo-occipital	✔		✔
26	71	Female	Glioblastoma (IV)	Left frontal	✔		✔
27	63	Female	Glioblastoma (IV)	Right parieto-occipital	✔		✔
28	73	Male	Glioblastoma (IV)	Right fronto-parieto-temporal	✔		✔
29	45	Male	Diffuse astrocytoma (II)	Left frontal	✔	✔
30	45	Male	Diffuse astrocytoma (II)	Right temporal	✔	✔
31'	52	Male	Oligodendroglioma (II)	Left frontal	✔
32	52	Female	Oligodendroglioma (II)	Left frontal	✔
33	33	Female	Oligodendroglioma (II)	Right frontal	✔	✔
34	43	Male	Oligodendroglioma (II)	Right frontal	✔	✔
35	31	Male	Anaplastic oligodendroglioma (III)	Left parieto-temporal	✔	✔
36	61	Male	Glioblastoma (IV)	Left parietal		✔
37	52	Female	Glioblastoma (IV)	Left parietal	✔	✔
38	38	Male	Glioblastoma (IV)	Left temporal	✔	✔
39'	65	Male	Glioblastoma (IV)	Left parieto-occipital		✔
40	33	Male	Glioblastoma (IV)	Right parieto-temporal	✔	✔
41	71	Female	Glioblastoma (IV)	Left frontal	✔
42	65	Female	Glioblastoma (IV)	Left temporal	✔
43'	35	Female	Glioblastoma (IV)	Right fronto-parietal	✔
44	46	Female	Glioblastoma (IV)	Right parieto-temporal	✔	✔
45	46	Male	Glioblastoma (IV)	Right frontal		✔
46	64	Female	Glioblastoma (IV)	Left temporal	✔
47	56	Female	Glioblastoma (IV)	Left temporal	✔
48	52	Female	Glioblastoma (IV)	Left parietal	✔	✔
49	48	Male	Glioblastoma (IV)	Right temporal	✔
50	67	Male	Glioblastoma (IV)	Left fronto-parietal	✔	✔
51	31	Male	Glioblastoma (IV)	Left fronto-parietal	✔
52	76	Male	Glioblastoma (IV)	Right occipital	✔
53	70	Male	Glioblastoma (IV)	Left temporal		✔
54'	32	Female	Glioblastoma (IV)	Left temporal	✔	✔
55	50	Female	Glioblastoma (IV)	Left parieto-occipital	✔
56	53	Male	Glioblastoma (IV)	Right occipital	✔	✔
57	58	Male	Glioblastoma (IV)	Right temporal	✔	✔
58	58	Female	Glioblastoma (IV)	Left temporal	✔
45'	47	Male	Glioblastoma (IV)	Right frontal	✔	✔
59	72	Male	Glioblastoma (IV)	Left temporal	✔	✔
60	53	Male	Glioblastoma (IV)	Left frontal	✔	✔
61	66	Male	Glioblastoma (IV)	Right frontal	✔
62	48	Female	Glioblastoma (IV)	Left parietal	✔	✔
63	63	Female	Glioblastoma (IV)	Right fronto-parietal	✔	✔
64	62	Male	Glioblastoma (IV)	Left temporal	✔	✔
65	68	Male	Glioblastoma (IV)	Right temporal	✔	✔
66	72	Male	Glioblastoma (IV)	Left temporal	✔
67	61	Male	Glioblastoma (IV)	Right temporal	✔
68	65	Female	Glioblastoma (IV)	Right frontal	✔	✔
69	59	Male	Glioblastoma (IV)	Right parietal	✔
70	63	Female	Glioblastoma (IV)	Left frontal	✔	✔
71	45	Female	Glioblastoma (IV)	Right temporal	✔
72	50	Female	Glioblastoma (IV)	Left parieto-occipital	✔	✔
73	56	Male	Glioblastoma (IV)	Left parieto-occipital			✔
74	50	Female	Glioblastoma (IV)	Left parieto-occipital			✔
75	69	Male	Glioblastoma (IV)	Left parietal			✔
76	60	Male	Glioblastoma (IV)	Left temporal			✔
20'	46	Female	Glioblastoma (IV)	Right parietal			✔
77	30	Male	Glioblastoma (IV)	Left occipital			✔
7''	64	Male	Glioblastoma (IV)	Right frontal			✔
78	33	Male	Diffuse astrocytoma (II)	Left temporal			✔
79	36	Male	Glioblastoma (IV)	Right frontal			✔
80	62	Female	Oligodendroglioma (II)	Left frontal			✔
81	59	Female	Glioblastoma (IV)	Right temporal			✔
82	38	Female	Oligodendroglioma (II)	Right fronto-parietal			✔
83	38	Male	Glioblastoma (IV)	Left fronto-parietal			✔
84	58	Male	Glioblastoma (IV)	Right temporal			✔
85	54	Female	Glioblastoma (IV)	Right temporal			✔
86	64	Male	Anaplastic astrocytoma (III)	Right parietal			✔
