# Supplementary material for: Potential Diagnostic Value of the Differential Expression of Histone H3 Variants between Low- and High-Grade Gliomas
Source: Cancers (Basel). 2021 Oct 20;13(21):5261. doi: 10.3390/cancers13215261 (PMC8582563; doi:10.3390/cancers13215261)
Supplement: Supplementary file 1 [file cancers-13-05261-s001.zip › Table S2.xlsx]

## Sheet: Hoja1
Table S2. Sequences of the primers used in the present study.
Gene	Primer	Sequence (5' → 3')
H3F3A	Forward	GGCTCGTACAAAGCAGACTGCC
	Reverse	GGAAGTTTGCGAATCAGAAG
H3F3B	Forward	AAGCCGCCAGGAAAAGCGCT
	Reverse	CTCTGAAACCTCAGGTCGGTT
H3F3C	Forward	AAAGCTGCCAGGAAAAGCACC
	Reverse	CTCTGAAACCTCAGGTCAGTG
HIST1H3A	Forward	AAGGCGCCACGCAAACAGT
	Reverse	CACCAGGCGCTGGAAAGGT
HIST1H3B	Forward	AGTTGCTGATTCGGAAGCTG
	Reverse	GGATGGCGCAAAGGTTTGTG
HIST1H3C	Forward	ATGGCTCGTACGAAGCAAACA
	Reverse	CGGCAGCTTCCGGATCAGC
HIST1H3D	Forward	CCAGCGTCTAGTCCGTGAG
	Reverse	CTTGGCGTGAATGGCGCAT
HIST1H3E	Forward	AGCAGACGGCTCGTAAATCC
	Reverse	ACGGCAGCTTCCGGATTAGA
HIST1H3F	Forward	AAGTCCACTGGCGGCAAAGCC
	Reverse	CGCTGGAATGGTAGCTTGCGA
HIST1H3G	Forward	CCAACGCCTGGTGCGAGAA
	Reverse	GCTTAGCATGGATGGCACAC
HIST1H3H	Forward	GCTATCGGCCTGGTACAGTG
	Reverse	CACCAGACGCTGAAAAGGC
HIST1H3I	Forward	CTGCTAATCCGGAAGCTACCT
	Reverse	ATAGTGACGCGTTTGGCGTGA
HIST1H3J	Forward	GCAAGGCACCGCGGAAGCAGC
	Reverse	CGCACCAGGCGCTGAAATGGC
HIST2H3A/C	Forward	CGGCGCTACCAGAAGTCC
	Reverse	AATGGTCACGCGCTTGGCG
HIST2H3D	Forward	GGAAGCAGCTGGCTACCAAA
	Reverse	TATGCCTTAGGCCCGCTCC
HIST2H3PS2	Forward	GCGGGAGATCCGGCGCTAT
	Reverse	CCCACCAGGTAGGCCTCT
H3.X	Forward	AGCCGCCAGAAAAAGGGCGT
	Reverse	GATGGCCTGGGCGATCTCA
H3.Y	Forward	CTGGCCACCAAAGCAGCCG
	Reverse	GGCGATCTCGCGCACCAGG
TBP	Forward	GAGCTGTGATGTGAAGTTTCC
	Reverse	TCTGGGTTTGATCATTCTGTAG
18S rRNA	Forward	GTAACCCGTTGAACCCCATT
	Reverse	CCATCCAATCGGTAGTAGCG
Gene	Primer	Sequence (5' → 3')
mMGMT	Forward	TTTCGACGTTCGTAGGTTTTCGC
	Reverse	GCACTCTTCCGAAAACGAAACG
uMGMT	Forward	TTTGTGTTTTGATGTTTGTAGGTTTTTGT
	Reverse	AACTCCACACTCTTCCAAAAACAAAACA
EGFRvIII	Forward	GGCTCTGGAGGAAAAGAAAGGTAAT
	Reverse	ACGCCGTCTTCCTCCATCT
EGFR total	Forward	GACAAGTGCAACCTTCTGGAG
	Reverse	TCCTGTGCAGGTGATGTTCA
D1S199	Forward	GGTGACAGAGTGAGACCCTG
	Reverse	CAAAGACCATGTCTCCGTA
D1S508	Forward	TCCCAGGCCTCTCTAGTAG
	Reverse	ATATTTTTGGCCCGTTGTTG
D1S2696	Forward	TCTTGGCCTTCCTGGTTTG
	Reverse	CCCATGCTCATTCCCACTAC
D1S2734	Forward	GGTTCAAGGGATTCTCCTG
	Reverse	TGGCACTCAGACCTCAA
D19S898	Forward	CCAGGAGGTCAAGGCTGC
	Reverse	AGCTCACTCTGCCCATTTCC
D19S412	Forward	TGAGCGACAGAATGAGACT
	Reverse	ACATCTTACTGAATGCTTGC
D19S596	Forward	GAATCCGAGAGGTGGG
	Reverse	GCCAGAGCCACTGTGT
H3F3A	Forward	TACGCTGTCGACATGGCTCGTACAAAGCAGACTGCC
cloning	Reverse	GGATCCCCGCGGTTAAGCACGTTCTCCACGTATG
H3F3B/C	Forward	TACGCTGTCGACATGGCCCGAACCAAGCAGAC
cloning	Reverse	GGATCCCCGCGGTTAAGCTCTCTCTCCCCGTATC
