# Supplementary material for: Potential Diagnostic Value of the Differential Expression of Histone H3 Variants between Low- and High-Grade Gliomas
Source: Cancers (Basel). 2021 Oct 20;13(21):5261. doi: 10.3390/cancers13215261 (PMC8582563; doi:10.3390/cancers13215261)
Supplement: Supplementary file 1 [file cancers-13-05261-s001.zip › Table S3.xlsx]

## Sheet: Hoja1
Table S3. RNA-seq results of gliomas expressing different levels of H3.1/H3.2 protein.
	H3.1/H3.2high vs. H3.1/H3.2low					H3.1/H3.2high vs. Grade II					H3.1/H3.2low vs. Grade II
Ensembl gene_id	log2FoldChange	lfcSE	stat	P-value	adj P-value	log2FoldChange	lfcSE	stat	P-value	adj P-value	log2FoldChange	lfcSE	stat	P-value	adj P-value	gene_name
ENSG00000188385	-4.94028	0.631415	-7.82415	5.11117e-15	9.90647e-11	0.641226	0.619572	1.03495	0.300692	0.858091	-4.25758	0.718379	-5.92664	3.09188e-09	3.51812e-07	JAKMIP3
ENSG00000278463	3.8881	0.508696	7.64327	2.11768e-14	1.86267e-10	-0.0840503	0.755479	-0.111254	0.911415	0.992092	3.85249	0.689915	5.58401	2.35042e-08	2.00583e-06	HIST1H2AB
ENSG00000277775	3.92032	0.515597	7.60346	2.88309e-14	1.86267e-10	5.3681	0.958103	5.60284	2.10863e-08	3.83618e-05	9.32106	0.915611	10.1802	2.4318e-24	1.16216e-20	HIST1H3F
ENSG00000189350	-5.61195	0.78002	-7.19462	6.26352e-13	3.03499e-09	0.770883	0.749252	1.02887	0.303541	0.85933	-4.84522	0.592255	-8.18097	2.81557e-16	1.99342e-13	TOGARAM2
ENSG00000183914	-5.11866	0.743893	-6.88091	5.94718e-12	2.30537e-08	2.58813	0.831166	3.11386	0.0018466	0.114056	-2.5181	0.739005	-3.40743	0.000655786	0.00691451	DNAH2
ENSG00000170779	2.21541	0.3239	6.8398	7.93018e-12	2.56171e-08	-0.0984443	0.485499	-0.202769	0.839315	0.986382	2.16527	0.384735	5.62796	1.82352e-08	1.63655e-06	CDCA4
ENSG00000115457	3.4474	0.51189	6.73465	1.6433e-11	3.53894e-08	2.49746	0.73105	3.41626	0.000634867	0.0610816	5.98398	0.743396	8.04952	8.31202e-16	5.29642e-13	IGFBP2
ENSG00000204969	-6.81123	1.01024	-6.74217	1.56042e-11	3.53894e-08	1.87848	0.765466	2.45403	0.0141265	0.343499	-4.91942	0.95204	-5.16724	2.37576e-07	1.45096e-05	PCDHA2
ENSG00000126785	2.61284	0.386699	6.75679	1.41085e-11	3.53894e-08	0.6312	0.482476	1.30825	0.190788	0.780698	3.28668	0.440116	7.46775	8.15798e-14	3.54427e-11	RHOJ
ENSG00000276368	5.26291	0.784558	6.70812	1.9715e-11	3.82117e-08	-0.334879	1.29437	-0.258721	0.795851	NaN	4.98994	1.04412	4.77909	1.76089e-06	6.91193e-05	HIST1H2AJ
ENSG00000123836	-2.31657	0.352031	-6.58057	4.68654e-11	8.25769e-08	0.767046	0.405842	1.89001	0.0587565	0.588506	-1.50799	0.371183	-4.06265	4.85179e-05	0.000929327	PFKFB2
ENSG00000152049	3.20469	0.491495	6.52029	7.01733e-11	1.13342e-07	0.715769	0.492929	1.45207	0.146481	0.739841	3.95717	0.521689	7.5853	3.31729e-14	1.62598e-11	KCNE4
ENSG00000278705	2.75184	0.424311	6.48543	8.84796e-11	1.31916e-07	-1.16921	0.718078	-1.62825	0.103472	0.679761	1.63456	0.716875	2.28012	0.0226008	0.0945169	HIST1H4B
ENSG00000279811	-6.24424	0.974735	-6.40609	1.49295e-10	1.9291e-07	2.15663	1.01636	2.12191	0.0338451	0.503244	-4.0751	0.706192	-5.77052	7.90255e-09	7.9508e-07	AC093330.2
ENSG00000197153	3.45874	0.539678	6.40889	1.46583e-10	1.9291e-07	1.04028	1.00851	1.03151	0.302304	0.859279	4.54443	0.905435	5.01905	5.19263e-07	2.647e-05	HIST1H3J
ENSG00000262223	-3.89107	0.610142	-6.37732	1.80219e-10	2.18313e-07	0.730126	0.600368	1.21613	0.223935	0.81465	-3.12542	0.666331	-4.69049	2.72546e-06	9.53621e-05	AC110285.1
ENSG00000275221	3.40464	0.534783	6.36639	1.93527e-10	2.20644e-07	-0.92328	0.744849	-1.23955	0.21514	0.805073	2.52953	0.677569	3.73325	0.000189028	0.0027112	HIST1H2AK
ENSG00000240184	1.88253	0.301727	6.23918	4.3988e-10	4.73653e-07	-1.77488	0.621709	-2.85484	0.00430583	0.184595	0.15741	0.613221	0.256693	0.797416	0.902061	PCDHGC3
ENSG00000175063	3.30919	0.535716	6.17713	6.52762e-10	6.65886e-07	0.865462	0.857482	1.00931	0.312828	0.865401	4.21511	0.769401	5.47843	4.29117e-08	3.30769e-06	UBE2C
ENSG00000150893	3.24791	0.527601	6.156	7.46067e-10	7.23013e-07	1.40389	0.604305	2.32316	0.0201707	0.399777	4.69384	0.643276	7.29677	2.94752e-13	1.19883e-10	FREM2
ENSG00000084453	-4.06069	0.662901	-6.12564	9.03214e-10	8.33623e-07	-1.27786	0.678098	-1.88448	0.0594999	0.589885	-5.26306	0.551743	-9.53895	1.4428e-21	3.44756e-18	SLCO1A2
ENSG00000144821	-4.32361	0.708031	-6.10652	1.01826e-09	8.97084e-07	0.130951	0.568225	0.230455	0.817738	0.984454	-4.16632	0.649796	-6.41173	1.43878e-10	2.54664e-08	MYH15
ENSG00000278637	2.57341	0.424262	6.06561	1.31458e-09	1.10779e-06	-0.356366	0.633554	-0.562488	0.573784	0.94811	2.26726	0.607615	3.73141	0.000190413	0.00272654	HIST1H4A
ENSG00000197410	-3.62998	0.604766	-6.00229	1.94552e-09	1.50832e-06	-0.726857	0.768539	-0.945764	0.344269	0.879478	-4.30774	0.77184	-5.58113	2.38964e-08	2.02663e-06	DCHS2
ENSG00000142700	2.57848	0.429157	6.00824	1.87553e-09	1.50832e-06	2.93376	0.65997	4.44529	8.7772e-06	0.00373722	5.55897	0.49136	11.3134	1.12593e-29	1.07617e-25	DMRTA2
ENSG00000010282	-4.79084	0.799402	-5.99302	2.05974e-09	1.53546e-06	1.14084	0.74121	1.53916	0.123766	0.702589	-3.60509	0.72413	-4.97852	6.40737e-07	3.14706e-05	HHATL
ENSG00000283486	-5.8594	0.979893	-5.97964	2.23636e-09	1.60537e-06	1.57011	0.770465	2.03788	0.0415622	0.530978	-4.27207	0.961876	-4.44139	8.93778e-06	0.000239964	FAM95C
ENSG00000277224	2.86314	0.484087	5.91452	3.3284e-09	2.30396e-06	-1.26746	0.577576	-2.19444	0.0282035	0.467798	1.64561	0.646147	2.5468	0.0108715	0.05482	HIST1H2BF
ENSG00000184357	3.38215	0.573941	5.89285	3.79598e-09	2.52069e-06	1.49098	0.825089	1.80705	0.0707543	0.623255	4.92186	0.841591	5.84828	4.96687e-09	5.24567e-07	HIST1H1B
ENSG00000275713	3.31382	0.56278	5.88831	3.90159e-09	2.52069e-06	4.88313	0.996646	4.89957	9.60481e-07	0.000800881	8.23449	0.912353	9.02555	1.78802e-19	2.62921e-16	HIST1H2BH
ENSG00000278828	3.22009	0.547411	5.8824	4.04361e-09	2.52817e-06	0.629669	0.608167	1.03536	0.300503	0.858091	3.89846	0.709777	5.49251	3.9627e-08	3.10455e-06	HIST1H3H
ENSG00000282988	3.35169	0.571221	5.86759	4.42171e-09	2.67818e-06	-0.851594	0.653191	-1.30374	0.192321	0.782883	2.5492	0.649244	3.92642	8.62198e-05	0.0014729	AL031777.3
ENSG00000276903	3.79328	0.650351	5.83266	5.45496e-09	2.90392e-06	-0.275461	1.01163	-0.272294	0.785396	0.983129	3.55967	0.905012	3.93328	8.37947e-05	0.00144308	HIST1H2AL
ENSG00000273983	4.76375	0.816504	5.83432	5.40096e-09	2.90392e-06	6.55276	1.52722	4.29064	1.78163e-05	0.00636677	11.3971	1.40223	8.12785	4.36965e-16	2.98322e-13	HIST1H3G
ENSG00000196083	3.2345	0.553314	5.84568	5.04498e-09	2.90392e-06	1.02868	0.48042	2.14121	0.032257	0.493241	4.30683	0.663807	6.48807	8.69439e-11	1.62943e-08	IL1RAP
ENSG00000174611	-4.26432	0.730383	-5.83848	5.268e-09	2.90392e-06	0.180091	0.446353	0.403472	0.686601	0.968594	-4.03617	0.841653	-4.79552	1.62251e-06	6.46164e-05	KY
ENSG00000185615	-3.64992	0.626061	-5.82998	5.54355e-09	2.90392e-06	0.512448	0.672274	0.762261	0.445904	0.916837	-3.10206	0.730037	-4.24919	2.14546e-05	0.000485931	PDIA2
ENSG00000222041	1.99402	0.342504	5.82187	5.81918e-09	2.96809e-06	1.20427	0.616727	1.95268	0.0508571	0.564239	3.2369	0.568191	5.69686	1.22033e-08	1.14381e-06	CYTOR
ENSG00000278588	4.77511	0.824649	5.79048	7.01871e-09	3.48812e-06	2.3614	1.40101	1.6855	0.0918928	NaN	7.16936	1.20885	5.93071	3.01619e-09	3.5157e-07	HIST1H2BI
ENSG00000275379	3.29443	0.572008	5.75941	8.44101e-09	4.09009e-06	1.03912	1.10344	0.94171	0.346341	0.880796	4.39248	1.1386	3.85781	0.000114409	0.00184095	HIST1H3I
ENSG00000286522	3.32503	0.578864	5.74406	9.24346e-09	4.36968e-06	0.255233	0.937597	0.272221	0.785452	0.983129	3.62168	0.918893	3.94135	8.10226e-05	0.00140931	HIST1H3B
ENSG00000123610	3.08818	0.538042	5.73967	9.48629e-09	4.3777e-06	2.13708	0.97369	2.19482	0.0281762	NaN	5.28397	0.709024	7.45246	9.16145e-14	3.89179e-11	TNFAIP6
ENSG00000287080	3.26707	0.571025	5.72142	1.05639e-08	4.76162e-06	0.715448	0.849969	0.841735	0.399936	0.901112	4.02935	0.899235	4.48087	7.43395e-06	0.000208674	HIST1H3C
ENSG00000286534	-7.26547	1.2719	-5.7123	1.1146e-08	4.90981e-06	1.15072	0.957582	1.20169	0.229483	0.820644	-6.10779	1.61828	-3.77425	0.000160491	0.0023987	AC021683.6
ENSG00000133110	5.68931	0.99866	5.69694	1.21974e-08	5.25355e-06	1.89533	1.14101	1.6611	0.0966934	0.669328	7.63612	0.642466	11.8856	1.40566e-32	2.68705e-28	POSTN
ENSG00000171649	1.69515	0.297975	5.68889	1.27865e-08	5.38757e-06	-0.231306	0.403137	-0.573765	0.566127	0.947219	1.51372	0.328933	4.60192	4.18619e-06	0.000132708	ZIK1
ENSG00000166535	-3.17669	0.559552	-5.6772	1.36914e-08	5.52846e-06	0.584621	0.508247	1.15027	0.250032	0.833572	-2.54055	0.62225	-4.08284	4.44889e-05	0.000871363	A2ML1
ENSG00000157456	3.40249	0.59902	5.68009	1.34624e-08	5.52846e-06	-0.0614173	0.864987	-0.0710037	0.943395	0.994614	3.38791	0.851629	3.97815	6.94533e-05	0.00124898	CCNB2
ENSG00000167676	-4.98297	0.878791	-5.67026	1.42582e-08	5.63986e-06	0.636678	0.695352	0.915619	0.359867	0.884012	-4.30104	0.875497	-4.91269	8.98358e-07	4.09857e-05	PLIN4
ENSG00000184260	1.85529	0.327857	5.65884	1.52395e-08	5.79162e-06	-0.389051	0.474604	-0.819737	0.412366	0.904165	1.51665	0.456234	3.32428	0.000886473	0.00861845	HIST2H2AC
ENSG00000155657	-3.06671	0.541687	-5.6614	1.50139e-08	5.79162e-06	-0.53443	0.642304	-0.832052	0.40538	0.903022	-3.54887	0.666356	-5.32579	1.00516e-07	6.76573e-06	TTN
ENSG00000183598	3.18949	0.564388	5.65125	1.59289e-08	5.93718e-06	1.028	0.641968	1.60132	0.109306	0.685102	4.26074	0.63156	6.74637	1.51586e-11	3.71503e-09	HIST2H3D
ENSG00000117399	3.4456	0.613319	5.61795	1.93233e-08	7.06649e-06	1.82854	0.764172	2.39284	0.0167186	0.372575	5.3127	0.816862	6.5038	7.83172e-11	1.55949e-08	CDC20
ENSG00000278677	3.17394	0.565964	5.60803	2.04643e-08	7.33081e-06	-0.156729	1.06314	-0.147421	0.8828	0.990789	3.0636	1.06827	2.86783	0.00413302	0.0270016	HIST1H2AM
ENSG00000071575	2.67302	0.476883	5.60519	2.08025e-08	7.33081e-06	-0.547089	0.510393	-1.0719	0.283767	0.852978	2.17413	0.62322	3.48854	0.000485675	0.00547093	TRIB2
ENSG00000253877	-8.12965	1.45505	-5.58719	2.3077e-08	7.84698e-06	1.05462	0.94642	1.11433	0.265138	0.842693	-6.99038	1.42692	-4.89895	9.63512e-07	4.32232e-05	LINC01608
ENSG00000175445	4.0363	0.72231	5.58804	2.29643e-08	7.84698e-06	-2.68012	0.725856	-3.69235	NaN	NaN	1.40178	0.970845	1.44388	0.148773	0.343016	LPL
ENSG00000223703	5.76336	1.03271	5.5808	2.39416e-08	8.00063e-06	1.0546	1.26901	0.831035	0.405954	NaN	6.88273	0.94457	7.28663	3.17793e-13	1.26561e-10	AC027612.1
ENSG00000164111	1.52487	0.273649	5.57236	2.51312e-08	8.2558e-06	0.196744	0.542742	0.3625	0.716979	0.97311	1.77311	0.524777	3.37878	0.00072809	0.00744288	ANXA5
ENSG00000164002	-3.03098	0.547407	-5.53697	3.0775e-08	9.94135e-06	-0.160131	0.418366	-0.382754	0.701902	0.971503	-3.14694	0.586332	-5.36717	7.99824e-08	5.5598e-06	EXO5
ENSG00000104368	2.4146	0.437956	5.51334	3.52079e-08	1.11869e-05	1.96217	0.461381	4.25281	2.11108e-05	0.00681402	4.41985	0.512384	8.62606	6.35021e-18	7.58691e-15	PLAT
ENSG00000229425	-5.44156	0.990233	-5.49523	3.90198e-08	1.21981e-05	-0.481484	0.978914	-0.491855	0.622822	0.958688	-5.8985	1.35921	-4.33965	1.4271e-05	0.00034576	AJ009632.2
ENSG00000214402	-4.41205	0.804698	-5.48286	4.18495e-08	1.2875e-05	0.205082	0.821638	0.249602	0.802895	0.984287	-4.16547	0.547299	-7.61096	2.72061e-14	1.44464e-11	LCNL1
ENSG00000131981	3.28851	0.601611	5.46617	4.59876e-08	1.39271e-05	1.12627	0.494766	2.27636	0.0228243	0.42371	4.45642	0.687857	6.47871	9.25117e-11	1.71695e-08	LGALS3
ENSG00000146021	-2.5267	0.462959	-5.45773	4.8226e-08	1.43803e-05	0.418016	0.513753	0.813652	0.415844	0.904218	-2.06608	0.518716	-3.98307	6.80304e-05	0.00122686	KLHL3
ENSG00000277494	-4.61961	0.848288	-5.44581	5.15714e-08	1.51448e-05	0.603983	0.653215	0.924631	0.355158	0.883039	-3.9714	0.87582	-4.53449	5.77418e-06	0.000171396	GPIHBP1
ENSG00000130035	-1.69028	0.311643	-5.42377	5.83559e-08	1.68814e-05	0.141168	0.342918	0.411668	0.680583	0.967505	-1.50521	0.351219	-4.28567	1.82191e-05	0.000423695	GALNT8
ENSG00000169064	-3.98717	0.735657	-5.41987	5.96424e-08	1.69998e-05	0.108494	0.532528	0.203734	0.838561	0.986361	-3.82265	0.925831	-4.12888	3.64529e-05	0.000744481	ZBBX
ENSG00000150867	-2.82265	0.521593	-5.4116	6.24648e-08	1.75463e-05	0.460269	0.588675	0.781874	0.434289	0.912631	-2.31027	0.322714	-7.15889	8.13352e-13	2.77643e-10	PIP4K2A
ENSG00000172403	-3.20816	0.594704	-5.39455	6.86961e-08	1.9021e-05	-0.757418	0.567599	-1.33443	0.182064	0.774864	-3.91352	0.711236	-5.50242	3.74617e-08	2.94699e-06	SYNPO2
ENSG00000132646	2.05258	0.381332	5.38267	7.33902e-08	2.00345e-05	-0.501464	0.518839	-0.966511	0.333789	0.874454	1.60168	0.515291	3.1083	0.0018817	0.0150316	PCNA
ENSG00000103449	1.79657	0.335532	5.35438	8.5851e-08	2.31106e-05	-0.593337	0.502357	-1.18111	0.23756	0.826218	1.25785	0.444455	2.83009	0.00465351	0.0294081	SALL1
ENSG00000179431	2.44121	0.456574	5.3468	8.95229e-08	2.37689e-05	-1.98992	0.597385	-3.33105	0.000865182	0.0749068	0.499541	0.622306	0.802726	0.422133	0.649212	FJX1
ENSG00000151338	-4.41485	0.826275	-5.34307	9.13846e-08	2.39353e-05	-0.326253	0.588716	-0.554177	0.579458	0.949322	-4.69645	0.829869	-5.65926	1.52023e-08	1.39047e-06	MIPOL1
ENSG00000207955	-4.46686	0.837585	-5.33302	9.65906e-08	2.48178e-05	-0.479205	0.749469	-0.639393	0.522567	0.94059	-4.89464	0.773041	-6.33166	2.42533e-10	3.99839e-08	AL359091.1
ENSG00000204278	-7.7889	1.46087	-5.33167	9.73145e-08	2.48178e-05	0.988176	0.955408	1.0343	0.300997	0.858091	-6.93472	1.2161	-5.70243	1.18111e-08	1.11773e-06	TMEM235
ENSG00000089685	2.74773	0.516476	5.32015	1.03682e-07	2.57637e-05	1.11433	1.03278	1.07896	0.280604	0.851599	3.90715	1.04659	3.73321	0.000189058	0.0027112	BIRC5
ENSG00000136541	-4.4362	0.833598	-5.32175	1.02773e-07	2.57637e-05	0.782733	0.854651	0.915851	0.359745	0.884012	-3.60673	0.669644	-5.38604	7.20262e-08	5.09945e-06	ERMN
ENSG00000087245	2.35296	0.442494	5.31749	1.05211e-07	2.58127e-05	0.440437	0.543108	0.810957	0.41739	0.904994	2.84023	0.555374	5.11408	3.15268e-07	1.83181e-05	MMP2
ENSG00000136895	-1.73891	0.328497	-5.29352	1.19982e-07	2.87729e-05	0.148962	0.499196	0.298404	0.765395	0.982232	-1.55315	0.530801	-2.92605	0.00343293	0.0235225	GARNL3
ENSG00000152214	-3.6124	0.68247	-5.29312	1.20246e-07	2.87729e-05	0.45742	0.543659	0.841374	0.400138	0.901347	-3.10735	0.835089	-3.72098	0.000198449	0.00281382	RIT2
ENSG00000261786	-1.98221	0.375265	-5.28217	1.27663e-07	3.01752e-05	-0.303203	0.622071	-0.487409	0.625968	0.959945	-2.24349	0.636618	-3.52407	0.00042497	0.00495456	AC006058.1
ENSG00000173705	-4.09936	0.780194	-5.25428	1.48601e-07	3.4701e-05	-0.536314	0.707049	-0.758525	0.448137	0.916837	-4.57217	0.700075	-6.53097	6.5344e-11	1.34314e-08	SUSD5
ENSG00000274641	3.41854	0.653382	5.23207	1.67626e-07	3.73439e-05	0.124824	0.932987	0.133789	0.893569	0.991044	3.59003	0.876652	4.09516	4.21875e-05	0.000835705	HIST1H2BO
ENSG00000115896	-3.75567	0.717414	-5.235	1.64981e-07	3.73439e-05	0.117797	0.506255	0.232683	0.816008	0.984454	-3.59184	0.794133	-4.52297	6.09778e-06	0.000179056	PLCL1
ENSG00000154914	-3.94403	0.753751	-5.23254	1.67198e-07	3.73439e-05	-0.189794	0.445536	-0.425991	0.670114	0.966563	-4.09592	0.869748	-4.70931	2.48555e-06	8.93116e-05	USP43
ENSG00000166483	2.62152	0.500645	5.23629	1.63836e-07	3.73439e-05	1.39819	0.5829	2.39868	0.0164541	0.369148	4.06024	0.496106	8.18421	2.74095e-16	1.99342e-13	WEE1
ENSG00000196747	3.13251	0.600841	5.21355	1.85264e-07	4.08044e-05	0.901174	0.757493	1.18968	0.234172	0.823548	4.08098	0.808235	5.04925	4.43541e-07	2.36176e-05	HIST1H2AI
ENSG00000280222	-3.03749	0.583506	-5.20559	1.93378e-07	4.2113e-05	0.655897	0.710328	0.923372	0.355813	0.883039	-2.34465	0.833037	-2.81458	0.00488413	0.0304418	AL365209.1
ENSG00000124635	3.44463	0.66237	5.20046	1.98793e-07	4.28112e-05	1.18755	0.98819	1.20175	0.229462	0.820644	4.69769	0.873096	5.3805	7.42785e-08	5.20113e-06	HIST1H2BJ
ENSG00000162390	-2.10637	0.406474	-5.18205	2.19462e-07	4.6743e-05	1.1645	0.598893	1.94442	0.0518449	0.566326	-0.906983	0.575319	-1.57649	0.114913	0.288733	ACOT11
ENSG00000283503	-3.90459	0.75436	-5.17603	2.26654e-07	4.77502e-05	1.33051	0.780213	1.70531	0.0881359	0.654447	-2.54101	1.01568	-2.50179	0.0123568	0.0602278	LINC01902
ENSG00000172508	-5.04748	0.976857	-5.16707	2.37797e-07	4.93225e-05	1.15364	1.02521	1.12527	0.260474	0.841595	-3.8556	0.582638	-6.61748	3.6538e-11	8.21717e-09	CARNS1
ENSG00000171320	3.18366	0.616513	5.16398	2.41752e-07	4.93225e-05	-0.387286	1.12796	-0.343353	0.731333	0.975761	2.85751	1.04671	2.72999	0.00633372	0.0366562	ESCO2
ENSG00000118705	1.71569	0.332121	5.16586	2.39341e-07	4.93225e-05	-0.403117	0.440415	-0.915313	0.360027	0.884012	1.35893	0.413102	3.28957	0.00100342	0.00945362	RPN2
ENSG00000197903	2.48153	0.484469	5.12218	3.02031e-07	6.09788e-05	1.07626	0.532372	2.02163	0.0432142	0.539547	3.59553	0.434745	8.27043	1.33472e-16	1.0631e-13	HIST1H2BK
ENSG00000225649	3.59536	0.702766	5.11601	3.12067e-07	6.20218e-05	2.04456	0.873383	2.34097	0.0192338	0.395026	5.6786	0.937324	6.05831	1.3756e-09	1.81351e-07	AC064875.1
ENSG00000215861	-2.40794	0.470752	-5.11509	3.13597e-07	6.20218e-05	-0.114727	0.540873	-0.212114	0.832018	0.985431	-2.47167	0.528334	-4.67824	2.89347e-06	0.000100215	AC245297.1
ENSG00000152953	2.20292	0.431156	5.10934	3.23288e-07	6.32927e-05	1.57819	0.444281	3.55223	0.000381976	0.0460488	3.82894	0.444654	8.61105	7.23956e-18	8.14067e-15	STK32B
ENSG00000112559	3.31254	0.648909	5.10478	3.31173e-07	6.4188e-05	-1.75541	0.722391	-2.43	0.015099	0.355902	1.59728	0.707223	2.25852	0.0239131	0.0979269	MDFI
ENSG00000170743	-4.50637	0.883629	-5.09984	3.39938e-07	6.52344e-05	-0.190169	0.463034	-0.410701	0.681291	0.967535	-4.64572	0.948152	-4.89976	9.59514e-07	4.31578e-05	SYT9
ENSG00000224126	3.38389	0.664323	5.09375	3.51054e-07	6.67071e-05	0.731748	1.3479	0.542882	0.587211	NaN	4.14028	0.85936	4.81787	1.45099e-06	5.97781e-05	UBE2SP2
ENSG00000101384	2.44019	0.479682	5.0871	3.63587e-07	6.8418e-05	0.669987	0.522055	1.28336	0.199365	0.789412	3.15875	0.550029	5.74288	9.308e-09	9.21926e-07	JAG1
ENSG00000163749	-5.80995	1.14322	-5.08208	3.73319e-07	6.87691e-05	1.96666	1.01488	1.93782	0.0526451	0.569796	-3.78008	1.60104	-2.36101	0.018225	NaN	CCDC158
ENSG00000178445	2.5229	0.496568	5.08067	3.76098e-07	6.87691e-05	-1.10755	0.512882	-2.15947	0.0308141	0.486318	1.46267	0.573699	2.54953	0.0107867	0.0545212	GLDC
ENSG00000019991	-2.71425	0.534147	-5.08147	3.74534e-07	6.87691e-05	1.80592	0.546428	3.30495	0.000949936	0.0805514	-0.863353	0.555644	-1.55379	0.120235	0.297992	HGF
ENSG00000196787	3.92308	0.773068	5.07469	3.88128e-07	7.03057e-05	2.36505	0.910063	2.59877	0.00935582	0.277171	6.33499	0.752514	8.41843	3.81567e-17	3.31547e-14	HIST1H2AG
ENSG00000132702	-3.79083	0.752314	-5.03889	4.68243e-07	8.40323e-05	1.27659	0.750823	1.70025	0.0890832	0.656976	-2.47376	0.626824	-3.94649	7.93037e-05	0.00138445	HAPLN2
ENSG00000180071	-5.2491	1.04212	-5.03693	4.73046e-07	8.41153e-05	1.28562	0.87847	1.46348	0.143337	0.734939	-3.93102	0.860848	-4.56645	4.96055e-06	0.000152208	ANKRD18A
ENSG00000130600	5.12741	1.01993	5.0272	4.97683e-07	8.76917e-05	4.52054	1.11926	4.03887	NaN	NaN	9.67947	0.945597	10.2364	1.36258e-24	8.68239e-21	H19
ENSG00000158373	2.44696	0.487082	5.02372	5.06809e-07	8.84952e-05	-0.947613	0.616477	-1.53714	0.124259	0.704238	1.54721	0.52633	2.93961	0.00328627	0.0228161	HIST1H2BD
ENSG00000186231	-4.2097	0.841965	-4.99985	5.73756e-07	9.92905e-05	-0.864855	0.575848	-1.50188	0.133128	0.718504	-5.01916	0.856553	-5.85972	4.63645e-09	4.97923e-07	KLHL32
ENSG00000188916	3.61109	0.723305	4.99249	5.9607e-07	0.000102239	-1.58577	0.767325	-2.06662	0.0387701	0.519348	2.08831	0.778245	2.68336	0.00728876	0.0408	INSYN2A
ENSG00000158406	2.28596	0.458524	4.98548	6.18073e-07	0.000105083	-0.211006	0.558278	-0.377958	0.705462	0.971503	2.12353	0.60226	3.52593	0.000421996	0.00492784	HIST1H4H
ENSG00000237975	-4.59561	0.922686	-4.98069	6.33593e-07	0.000106785	-0.436228	0.86023	-0.507106	0.61208	0.956567	-5.00761	1.02435	-4.88856	1.01578e-06	4.4536e-05	FLG-AS1
ENSG00000233073	-6.03786	1.21434	-4.97213	6.62209e-07	0.000108348	1.98819	0.858033	2.31715	0.0204954	0.402166	-4.08122	1.87628	-2.17516	0.0296179	NaN	AC005009.2
ENSG00000233822	2.54895	0.512412	4.97441	6.54458e-07	0.000108348	-1.37672	0.65053	-2.1163	0.034319	0.504696	1.22171	0.677175	1.80413	0.0712108	0.209329	HIST1H2BN
ENSG00000197971	-5.39679	1.08583	-4.9702	6.68835e-07	0.000108348	0.957362	1.0416	0.919127	0.358029	0.883413	-4.39804	0.86112	-5.10735	3.26713e-07	1.89256e-05	MBP
ENSG00000141503	-1.8204	0.366304	-4.96963	6.70815e-07	0.000108348	0.0790852	0.411175	0.19234	0.847476	0.987761	-1.69738	0.298877	-5.67918	1.35339e-08	1.24983e-06	MINK1
ENSG00000167723	-2.65239	0.533598	-4.97077	6.6689e-07	0.000108348	1.42266	0.649247	2.19125	0.0284339	0.468715	-1.19396	0.518904	-2.30093	0.0213956	0.0906969	TRPV3
ENSG00000117013	-2.52141	0.507987	-4.96353	6.92243e-07	0.000110885	0.767849	0.696803	1.10196	0.270479	0.84437	-1.71504	0.830466	-2.06516	0.0389081	0.137607	KCNQ4
ENSG00000091513	-3.72802	0.752896	-4.95158	7.36149e-07	0.000116951	-0.204286	0.795112	-0.256928	0.797235	0.984062	-3.88794	0.704679	-5.51733	3.44197e-08	2.74153e-06	TF
ENSG00000100462	1.45939	0.294836	4.94983	7.42774e-07	0.000117044	-1.31554	0.466533	-2.81982	0.00480513	0.195846	0.198889	0.42196	0.471346	0.637393	0.805492	PRMT5
ENSG00000126787	3.75249	0.758912	4.94457	7.63119e-07	0.00011928	1.58739	1.03612	1.53205	0.12551	NaN	5.38538	0.787747	6.83644	8.11879e-12	2.21712e-09	DLGAP5
ENSG00000274290	2.81045	0.568736	4.94157	7.7496e-07	0.000120162	-1.35132	0.689831	-1.95891	0.050123	0.562026	1.5134	0.694878	2.17793	0.0294111	0.113351	HIST1H2BE
ENSG00000009950	-3.18344	0.645029	-4.93534	8.00099e-07	0.000123076	0.750164	0.744084	1.00817	0.313372	0.865949	-2.3895	0.670516	-3.56367	0.000365703	0.00444706	MLXIPL
ENSG00000162728	-3.77733	0.765947	-4.93158	8.15668e-07	0.00012351	-0.515031	0.664904	-0.774595	0.438579	0.914445	-4.24112	0.718819	-5.90013	3.63218e-09	3.94504e-07	KCNJ9
ENSG00000166803	3.78581	0.767529	4.93247	8.11967e-07	0.00012351	-1.25988	0.993608	-1.26798	0.204804	0.79458	2.55542	0.742902	3.43977	0.0005822	0.00629844	PCLAF
ENSG00000181409	-3.43004	0.696751	-4.92291	8.52653e-07	0.000128109	0.682224	0.686634	0.993578	0.320429	0.867458	-2.71025	0.58369	-4.6433	3.42889e-06	0.000114193	AATK
ENSG00000204740	-6.8766	1.3981	-4.91852	8.72013e-07	0.00013001	3.7887	1.04246	3.63438	0.00027865	0.0381941	-3.45546	1.81426	-1.90461	0.0568303	NaN	MALRD1
ENSG00000140525	2.57381	0.524185	4.91013	9.1018e-07	0.000134665	0.488097	0.532779	0.916134	0.359597	0.884012	3.10386	0.596281	5.20536	1.93617e-07	1.2056e-05	FANCI
ENSG00000125970	1.34936	0.275049	4.9059	9.3e-07	0.000136555	-0.516531	0.445359	-1.15981	0.246127	0.831588	0.882056	0.401195	2.19857	0.0279085	0.109503	RALY
ENSG00000274997	3.28357	0.670024	4.90068	9.55078e-07	0.000139183	2.78436	1.02143	2.72594	0.00641195	0.226256	6.1086	0.846638	7.21512	5.38849e-13	1.98089e-10	HIST1H2AH
ENSG00000188107	-6.537	1.33469	-4.89778	9.69258e-07	0.000140195	1.22193	0.956088	1.27805	0.201231	0.791477	-6.21847	1.50895	-4.12106	3.77138e-05	0.000762897	EYS
ENSG00000116661	-3.99777	0.818474	-4.88441	1.03738e-06	0.000148938	0.258347	0.871397	0.296474	0.766868	0.982232	-3.69123	0.673632	-5.4796	4.263e-08	3.30769e-06	FBXO2
ENSG00000204653	-4.81638	0.988357	-4.87312	1.09851e-06	0.000156554	-0.310601	0.76599	-0.405489	0.685118	0.968408	-5.11686	0.802343	-6.3774	1.80124e-10	3.10203e-08	ASPDH
ENSG00000187764	-2.35696	0.484774	-4.86197	1.16222e-06	0.000164424	0.422331	0.507962	0.831422	0.405736	0.903064	-1.89565	0.490298	-3.86633	0.000110487	0.00178988	SEMA4D
ENSG00000285051	-3.00428	0.618658	-4.85612	1.19709e-06	0.000168131	0.4163	0.527202	0.789642	0.429737	0.911613	-2.54732	0.751536	-3.38948	0.000700242	0.00723534	SLC7A14-AS1
ENSG00000130653	-2.2273	0.458824	-4.85437	1.20772e-06	0.000168403	1.27521	0.725273	1.75825	0.0787044	0.636944	-0.926918	0.799748	-1.15901	0.246451	0.473673	PNPLA7
ENSG00000170312	2.77417	0.571948	4.85039	1.23221e-06	0.00017059	0.267007	0.714168	0.373872	0.7085	0.971752	3.09378	0.669128	4.6236	3.77142e-06	0.000121449	CDK1
ENSG00000148826	-5.41063	1.11669	-4.84524	1.2646e-06	0.000173834	1.35017	0.995094	1.35683	0.174836	0.76909	-4.01691	0.893411	-4.49615	6.91945e-06	0.000196834	NKX6-2
ENSG00000139354	3.15599	0.652892	4.83387	1.33906e-06	0.000182772	1.44475	0.604337	2.39064	0.0168193	0.37357	4.64602	0.715934	6.48946	8.61464e-11	1.62943e-08	GAS2L3
ENSG00000165028	-2.73642	0.567618	-4.82089	1.42919e-06	0.00019371	0.863648	0.572374	1.50889	0.131328	0.716045	-1.82988	0.739666	-2.47393	0.0133636	0.064218	NIPSNAP3B
ENSG00000236501	-6.15186	1.27734	-4.81617	1.46342e-06	0.000196972	-1.99253	0.657567	-3.03015	0.00244435	0.13702	-8.04947	1.22878	-6.5508	5.72307e-11	1.20222e-08	AC074286.1
ENSG00000053524	-3.06836	0.637446	-4.81352	1.48295e-06	0.000198225	-0.476045	0.494322	-0.963025	0.335535	0.875848	-3.49058	0.625478	-5.58067	2.396e-08	2.02663e-06	MCF2L2
ENSG00000184313	-3.28236	0.682497	-4.80934	1.51426e-06	0.000199656	1.20705	0.827601	1.4585	0.144704	0.737312	-2.03928	1.02133	-1.99669	0.0458592	0.154257	MROH7
ENSG00000187164	-2.4958	0.518845	-4.81029	1.50709e-06	0.000199656	0.960284	0.586293	1.63789	0.101444	0.675303	-1.49869	0.589444	-2.54254	0.0110049	0.0552439	SHTN1
ENSG00000155754	-4.34125	0.903128	-4.8069	1.53289e-06	0.000200747	2.57842	0.938109	2.74853	0.00598636	0.218611	-1.72533	1.05802	-1.63072	0.10295	NaN	C2CD6
ENSG00000074181	1.74541	0.363497	4.80172	1.57307e-06	0.000204626	0.120789	0.408374	0.295781	0.767397	0.982232	1.90868	0.40731	4.68607	2.78505e-06	9.69746e-05	NOTCH3
ENSG00000281938	-7.04538	1.46891	-4.79633	1.616e-06	0.000207814	1.26219	0.910221	1.38668	0.165538	0.759354	-5.72366	1.52583	-3.75117	0.000176012	NaN	AC034228.4
ENSG00000141574	3.03958	0.633781	4.79595	1.61902e-06	0.000207814	0.623521	0.705957	0.883228	0.377113	0.892643	3.69522	0.614205	6.01627	1.78478e-09	2.25946e-07	SECTM1
ENSG00000197959	-2.24391	0.468336	-4.79124	1.65752e-06	0.000208682	-0.213349	0.419152	-0.509001	0.610751	0.956567	-2.41086	0.499862	-4.82306	1.41374e-06	5.87501e-05	DNM3
ENSG00000139318	2.86714	0.598421	4.79117	1.65809e-06	0.000208682	-0.254891	0.693502	-0.367542	0.713215	0.972496	2.65879	0.744246	3.57246	0.000353646	0.00434685	DUSP6
ENSG00000165125	-5.23058	1.09138	-4.79265	1.64594e-06	0.000208682	1.23943	1.04047	1.19122	0.233566	0.823548	-3.9475	1.27407	-3.09834	0.00194606	NaN	TRPV6
ENSG00000165164	-3.64294	0.763473	-4.77154	1.82824e-06	0.000228613	0.761334	0.591878	1.2863	0.198338	0.788018	-2.81907	0.849947	-3.31676	0.000910672	0.00879663	CFAP47
ENSG00000101444	1.45745	0.305617	4.7689	1.85237e-06	0.000229307	-0.588858	0.452031	-1.30269	0.192679	0.782883	0.916088	0.40135	2.28252	0.0224589	0.0940471	AHCY
ENSG00000125835	1.73939	0.364778	4.76835	1.85745e-06	0.000229307	-0.3561	0.412036	-0.864245	0.387453	0.89692	1.43352	0.367303	3.90282	9.50775e-05	0.00159851	SNRPB
ENSG00000164543	1.96892	0.414236	4.75314	2.00285e-06	0.000245692	-0.113377	0.435783	-0.260169	0.794733	0.983806	1.90122	0.46204	4.11483	3.87467e-05	0.000779664	STK17A
ENSG00000112984	3.00156	0.632297	4.74707	2.06388e-06	0.000251081	1.11726	1.06119	1.05284	0.292414	0.855167	4.17016	0.920478	4.53043	5.88641e-06	0.000174187	KIF20A
ENSG00000127863	2.52165	0.531298	4.7462	2.07269e-06	0.000251081	0.307522	0.61326	0.501455	0.616051	0.956834	2.87122	0.551945	5.202	1.9715e-07	1.22361e-05	TNFRSF19
ENSG00000166794	1.70536	0.359434	4.74456	2.08957e-06	0.000251553	-0.778793	0.451442	-1.72512	0.0845052	0.6457	0.976464	0.475562	2.05328	0.0400451	0.140047	PPIB
ENSG00000163251	2.61269	0.551984	4.73327	2.2093e-06	0.000264325	0.0395017	0.559835	0.0705595	0.943748	0.994696	2.70696	0.700222	3.86586	0.000110697	0.00179064	FZD5
ENSG00000184005	-2.85782	0.604264	-4.72943	2.25154e-06	0.000267726	0.190876	0.577865	0.330313	0.741163	0.977694	-2.61123	0.627517	-4.16121	3.16565e-05	0.000662332	ST6GALNAC3
ENSG00000088756	-3.68823	0.780584	-4.72497	2.30151e-06	0.000270873	0.469381	0.480581	0.976694	0.328721	0.871218	-3.16266	0.857195	-3.68954	0.000224659	0.00308996	ARHGAP28
ENSG00000150656	-4.52239	0.957205	-4.72458	2.30595e-06	0.000270873	1.34108	0.931412	1.43984	0.149914	0.74204	-3.11732	0.744826	-4.1853	2.84787e-05	0.000614965	CNDP1
ENSG00000204628	1.59948	0.33908	4.71712	2.39202e-06	0.00027929	-0.441147	0.404803	-1.08978	0.27581	0.847353	1.20694	0.433272	2.78565	0.00534213	0.0323677	RACK1
ENSG00000061938	-1.52444	0.323287	-4.71544	2.41189e-06	0.000279924	-0.405418	0.384084	-1.05554	0.291176	0.854152	-1.88255	0.395222	-4.76327	1.9048e-06	7.40084e-05	TNK2
ENSG00000110318	-3.53697	0.752899	-4.6978	2.62979e-06	0.000301602	0.658535	0.542698	1.21345	0.224959	0.816258	-2.84331	0.895785	-3.1741	0.00150301	0.0127055	CEP126
ENSG00000164056	2.27443	0.484116	4.6981	2.62595e-06	0.000301602	1.05579	0.510399	2.06855	0.0385879	0.519314	3.37189	0.434328	7.76346	8.26457e-15	4.93705e-12	SPRY1
ENSG00000214456	-3.06812	0.653671	-4.69369	2.68327e-06	0.000305924	1.48377	0.730897	2.03006	0.04235	0.533997	-1.53302	0.81671	-1.87706	0.0605093	0.186714	PLIN5
ENSG00000197653	-3.4547	0.736886	-4.68824	2.75566e-06	0.000311767	2.29243	0.769207	2.98025	0.00288009	0.150881	-1.10807	0.54725	-2.0248	0.0428884	0.146848	DNAH10
ENSG00000171425	1.6216	0.345947	4.68742	2.76669e-06	0.000311767	-0.260418	0.438051	-0.594492	0.552183	0.946089	1.41079	0.394616	3.57509	0.000350105	0.00432104	ZNF581
ENSG00000148341	-1.19812	0.255838	-4.68312	2.82543e-06	0.000316546	0.303153	0.421646	0.718974	0.472157	0.92574	-0.854407	0.396042	-2.15736	0.0309775	0.117353	SH3GLB2
ENSG00000130475	-2.6539	0.567076	-4.67998	2.86906e-06	0.000319587	0.475852	0.622911	0.763916	0.444917	0.916837	-2.13744	0.585316	-3.65177	0.000260441	0.00344301	FCHO1
ENSG00000174576	-6.16081	1.31742	-4.67643	2.91914e-06	0.000323307	3.04082	1.9426	1.56533	0.117505	0.695862	-3.07922	1.18663	-2.59493	0.00946091	0.0496775	NPAS4
ENSG00000287299	-4.80848	1.02945	-4.67091	2.99873e-06	0.000330235	2.41832	0.776047	3.11621	0.00183194	0.114056	-2.42373	1.26208	-1.92043	0.0548037	NaN	AC012459.1
ENSG00000260599	-6.41617	1.37584	-4.66347	3.10924e-06	0.00034047	0.385539	0.879499	0.438362	0.661124	0.966563	-6.04113	1.40977	-4.28519	1.82581e-05	NaN	AC011467.1
ENSG00000242372	1.32693	0.284655	4.66154	3.13851e-06	0.000341091	-0.364244	0.38296	-0.951127	0.34154	0.878597	1.00803	0.320636	3.14384	0.00166749	0.0136747	EIF6
ENSG00000134531	2.84002	0.609343	4.66078	3.1501e-06	0.000341091	1.94022	0.500566	3.87606	0.000106163	0.0198751	4.82267	0.624826	7.71843	1.1777e-14	6.82207e-12	EMP1
ENSG00000087586	2.67463	0.575852	4.64465	3.40648e-06	0.000366803	0.157712	0.680435	0.231781	0.816708	0.984454	2.87749	0.627766	4.5837	4.56826e-06	0.000142458	AURKA
ENSG00000124575	2.63724	0.568191	4.64147	3.45938e-06	0.000369952	3.17921	0.580231	5.47921	4.27224e-08	7.12468e-05	5.85534	0.604963	9.67884	3.70911e-22	1.18172e-18	HIST1H1D
ENSG00000249992	2.80608	0.60468	4.6406	3.47391e-06	0.000369952	-0.33788	0.648597	-0.520939	0.602409	0.955746	2.5118	0.519131	4.83847	1.3084e-06	5.49699e-05	TMEM158
ENSG00000067955	1.31881	0.285046	4.62666	3.71617e-06	0.000389334	0.248548	0.400135	0.62116	0.534494	0.943157	1.61444	0.356816	4.52456	6.05201e-06	0.000178259	CBFB
ENSG00000272196	2.28458	0.493716	4.62732	3.70426e-06	0.000389334	-0.168557	1.16068	-0.145222	0.884535	0.990789	2.16761	1.23322	1.75768	0.0788022	0.223898	HIST2H2AA4
ENSG00000114757	-4.92745	1.06476	-4.62776	3.69647e-06	0.000389334	0.418991	0.90171	0.464663	0.642173	0.96361	-4.46106	0.971127	-4.5937	4.35459e-06	0.000137137	PEX5L
ENSG00000136997	1.82464	0.394547	4.62464	3.75247e-06	0.000389348	-1.34467	0.651248	-2.06476	0.0389456	0.519587	0.529484	0.649738	0.81492	0.415118	0.642917	MYC
ENSG00000103184	-4.24351	0.91763	-4.62442	3.75648e-06	0.000389348	0.069554	0.979008	0.0710453	0.943362	0.994614	-4.13413	0.736903	-5.61014	2.02163e-08	1.7809e-06	SEC14L5
ENSG00000267506	-3.61361	0.782164	-4.62002	3.83702e-06	0.00039558	-0.0994922	0.86022	-0.115659	0.907923	0.992092	-3.66336	1.11856	-3.27506	NaN	NaN	AC021683.2
ENSG00000183090	-5.24518	1.13697	-4.61329	3.96352e-06	0.00040646	-1.26592	1.10792	-1.14261	0.253201	0.837064	-6.46742	1.2621	-5.12431	2.98625e-07	1.74573e-05	FREM3
ENSG00000182329	-5.0016	1.08535	-4.60828	4.06023e-06	0.000414186	1.57021	0.935742	1.67803	0.0933403	0.666663	-3.37098	1.45466	-2.31737	0.0204836	0.0878342	KIAA2012
ENSG00000124374	-3.36164	0.729907	-4.60558	4.1132e-06	0.000415219	0.0316004	0.587658	0.0537735	0.957116	0.995876	-3.2735	0.690681	-4.73952	2.14221e-06	8.06833e-05	PAIP2B
ENSG00000129195	3.21989	0.699014	4.60632	4.09848e-06	0.000415219	1.0957	0.962593	1.13828	0.255004	0.838011	4.35261	0.937892	4.64084	3.46996e-06	0.00011496	PIMREG
ENSG00000068976	-3.36039	0.730796	-4.59827	4.26016e-06	0.000426102	-0.342708	0.833018	-0.411405	0.680775	0.967505	-3.66474	0.558023	-6.56737	5.12133e-11	1.08777e-08	PYGM
ENSG00000158816	-6.32784	1.37621	-4.59803	4.26498e-06	0.000426102	1.9713	0.886103	2.22469	0.0261021	0.451804	-4.43359	1.59863	-2.77337	0.0055479	NaN	VWA5B1
ENSG00000223812	-4.31226	0.93866	-4.59406	4.34713e-06	0.000432082	0.584783	0.99102	0.590082	NaN	NaN	-3.68788	1.35918	-2.71332	NaN	NaN	AC073365.1
ENSG00000120833	3.83934	0.836561	4.58943	4.44455e-06	0.000439511	0.164673	0.578551	0.284631	0.775927	0.982232	4.04694	0.969096	4.176	2.96684e-05	0.000632264	SOCS2
ENSG00000107959	-1.35823	0.296982	-4.57345	4.79751e-06	0.000472007	-0.0325629	0.370657	-0.087852	0.929994	0.993516	-1.34662	0.33332	-4.04003	5.34444e-05	0.00100853	PITRM1
ENSG00000147488	-3.96062	0.868834	-4.55854	5.15105e-06	0.00050423	1.3158	0.800088	1.64457	0.100058	0.673996	-2.61508	0.822685	-3.17871	0.00147932	0.0125764	ST18
ENSG00000181904	1.34849	0.2963	4.5511	5.33668e-06	0.000514134	-0.614408	0.359582	-1.70867	0.0875116	0.654177	0.779593	0.342781	2.27432	0.022947	0.0954841	C5orf24
ENSG00000164611	2.449	0.538085	4.55133	5.33086e-06	0.000514134	0.503209	0.514435	0.978178	0.327986	0.87092	2.99125	0.592675	5.04703	4.48742e-07	2.38282e-05	PTTG1
ENSG00000088325	2.69882	0.593115	4.55025	5.35833e-06	0.000514134	1.02828	0.540289	1.9032	0.0570143	0.58302	3.76745	0.585746	6.43187	1.26041e-10	2.29345e-08	TPX2
ENSG00000196109	-5.17155	1.13608	-4.55211	5.31106e-06	0.000514134	-0.299606	0.869125	-0.344722	0.730304	0.975436	-5.45548	0.958175	-5.69361	1.24379e-08	1.15982e-06	ZNF676
ENSG00000145063	-3.1599	0.694679	-4.54872	5.39741e-06	0.000515333	0.243178	1.00003	0.243172	0.807872	0.984422	-2.86247	1.18781	-2.40986	0.0159585	0.0735267	AC062028.1
ENSG00000263426	-5.76173	1.26881	-4.54105	5.5976e-06	0.000531827	1.32537	1.02026	1.29905	0.193926	0.783534	-4.41377	1.16161	-3.7997	0.000144869	0.00220662	RN7SL471P
ENSG00000206561	-1.55718	0.343017	-4.53967	5.6342e-06	0.000532693	0.736487	0.545184	1.3509	0.176729	0.770186	-0.780055	0.574534	-1.35772	0.174553	0.38074	COLQ
ENSG00000092529	-3.3661	0.742024	-4.53637	5.72296e-06	0.000538459	1.14944	0.672924	1.70812	0.0876138	0.654177	-2.17859	0.671499	-3.24437	0.0011771	0.0106289	CAPN3
ENSG00000263603	-2.48945	0.549161	-4.53318	5.81012e-06	0.000544018	0.544657	1.05894	0.514342	0.607013	0.956144	-1.90044	1.23852	-1.53444	0.124921	0.305682	AC127024.2
ENSG00000107518	-4.07864	0.901702	-4.52327	6.08919e-06	0.000558078	-0.19814	0.785289	-0.252315	0.800797	0.984287	-4.22407	0.884762	-4.77424	1.80385e-06	7.06606e-05	ATRNL1
ENSG00000167549	-3.67632	0.812852	-4.52275	6.10424e-06	0.000558078	-0.12604	0.849485	-0.148372	0.882049	0.990789	-3.76075	0.70325	-5.34767	8.90916e-08	6.10421e-06	CORO6
ENSG00000275126	3.96086	0.875586	4.52367	6.07763e-06	0.000558078	4.51926	1.67231	2.70241	0.00688382	NaN	8.47004	1.47591	5.73885	9.5321e-09	9.34439e-07	HIST1H4L
ENSG00000133640	-4.11592	0.910023	-4.52287	6.10067e-06	0.000558078	1.80544	0.851781	2.1196	0.0340398	0.503382	-2.26122	1.28789	-1.75576	0.0791296	NaN	LRRIQ1
ENSG00000138834	-1.32046	0.291847	-4.52448	6.05439e-06	0.000558078	0.406728	0.399881	1.01712	0.309096	0.8622	-0.873038	0.368227	-2.37092	0.0177438	0.079417	MAPK8IP3
ENSG00000179083	-4.23433	0.936451	-4.52168	6.13506e-06	0.000558261	-0.904459	0.550992	-1.64151	0.100692	0.674657	-5.13387	0.857615	-5.98622	2.14772e-09	2.61971e-07	FAM133A
ENSG00000237166	-6.8277	1.51107	-4.51847	6.22894e-06	0.000564155	1.13056	1.00124	1.12915	0.258834	0.840032	-5.75879	1.37235	-4.19631	2.71295e-05	NaN	LINC01792
ENSG00000122367	-4.70258	1.04262	-4.51035	6.47197e-06	0.000581485	0.936578	1.05155	0.890663	0.37311	0.891352	-3.75499	0.844727	-4.44521	8.78073e-06	0.000236858	LDB3
ENSG00000249306	-3.80674	0.844051	-4.51008	6.48028e-06	0.000581485	1.38661	0.874704	1.58524	0.112913	0.687858	-2.38879	1.15101	-2.07539	0.0379502	0.13517	LINC01411
ENSG00000259462	-3.47135	0.770395	-4.50593	6.60817e-06	0.000590228	-0.0161051	0.598179	-0.0269235	0.978521	0.998081	-3.45264	0.730107	-4.72895	2.25689e-06	8.36099e-05	CPEB1-AS1
ENSG00000242759	-2.15272	0.477904	-4.50449	6.65313e-06	0.000591518	0.0250041	0.4554	0.0549057	0.956214	0.995876	-2.08453	0.554759	-3.75753	0.000171597	0.00253496	LINC00882
ENSG00000248590	2.45155	0.544419	4.50307	6.698e-06	0.000592789	-1.31763	0.694179	-1.89812	0.0576806	0.584948	1.1874	0.662069	1.79346	0.072899	0.212754	GLDCP1
ENSG00000163285	-5.25309	1.16823	-4.49661	6.90467e-06	0.000608301	-1.17445	0.728384	-1.61241	0.106873	0.682432	-6.37018	1.14987	-5.53993	3.02594e-08	2.47196e-06	GABRG1
ENSG00000267072	-3.94928	0.879271	-4.49154	7.07097e-06	0.000620133	0.967004	0.817392	1.18304	0.236795	0.82499	-2.92501	1.24107	-2.35684	0.018431	0.0815571	NAGPA-AS1
ENSG00000168078	3.29748	0.73513	4.48557	7.27199e-06	0.000634891	0.458742	0.852502	0.538113	0.590499	0.95188	3.79533	0.836721	4.53595	5.73434e-06	0.000170984	PBK
ENSG00000129474	2.11494	0.471748	4.48319	7.35358e-06	0.000635466	0.326812	0.646066	0.505849	0.612962	0.956567	2.49136	0.589552	4.22585	2.38037e-05	0.000523626	AJUBA
ENSG00000261701	-3.44811	0.769117	-4.4832	7.35317e-06	0.000635466	-0.497164	0.899686	-0.552597	0.58054	0.949322	-3.88738	0.942277	-4.12552	3.69898e-05	0.000751431	HPR
ENSG00000139921	1.58335	0.353229	4.48251	7.37693e-06	0.000635466	-0.330643	0.493475	-0.670031	0.502838	0.933667	1.2977	0.506913	2.56	0.0104671	0.0533997	TMX1
ENSG00000182580	2.17797	0.486076	4.48072	7.43913e-06	0.000637988	-1.53471	0.486672	-3.15348	0.00161339	0.105513	0.693551	0.59493	1.16577	0.243708	0.470856	EPHB3
ENSG00000112796	-3.39613	0.759125	-4.47374	7.68627e-06	0.000656279	0.0479075	0.511445	0.093671	0.925371	0.993516	-3.30489	0.817361	-4.04336	5.26896e-05	0.000996255	ENPP5
ENSG00000064787	-4.56587	1.02124	-4.47091	7.7886e-06	0.000662099	1.22091	0.745658	1.63736	0.101555	0.675303	-3.30615	1.04138	-3.17478	0.0014995	0.012689	BCAS1
ENSG00000100276	-2.26227	0.506114	-4.46989	7.82595e-06	0.000662369	-1.34981	0.459387	-2.93828	0.00330042	0.159922	-3.56175	0.602528	-5.91135	3.39319e-09	3.72783e-07	RASL10A
ENSG00000183783	-4.01733	0.90017	-4.46286	8.08728e-06	0.000681512	0.183905	0.789377	0.232975	0.815781	0.984454	-3.79231	0.920377	-4.12039	3.78233e-05	0.000764302	KCTD8
ENSG00000156042	-2.9556	0.663503	-4.45454	8.4073e-06	0.000705412	0.772825	0.719964	1.07342	0.283082	0.852978	-2.15277	0.564767	-3.81178	0.000137971	0.00212697	CFAP70
ENSG00000170011	-3.26498	0.73376	-4.44965	8.60088e-06	0.000718544	0.0177883	0.705653	0.0252083	0.979889	0.998458	-3.19839	0.626326	-5.10659	3.28024e-07	1.89441e-05	MYRIP
ENSG00000279387	-4.53543	1.02113	-4.4416	8.92936e-06	0.000742785	0.0834578	0.843227	0.0989743	0.921159	0.993215	-4.40021	1.22778	-3.58388	0.000338533	0.00422768	AC011474.4
ENSG00000253861	7.29739	1.6441	4.43852	9.05777e-06	0.000750246	-6.50576	3.63568	-1.78942	NaN	NaN	0.826692	2.75039	0.300573	0.76374	0.88349	SLC2A3P1
ENSG00000117480	-2.41891	0.545391	-4.43519	9.19913e-06	0.000758713	0.40029	0.590943	0.677375	0.498168	0.931747	-1.97384	0.6266	-3.15008	0.00163228	0.0135077	FAAH
ENSG00000154493	-2.99539	0.676017	-4.43093	9.3826e-06	0.000767315	1.42156	0.71954	1.97566	0.0481937	0.556759	-1.5448	0.468429	-3.29782	0.000974369	0.00925748	C10orf90
ENSG00000055813	-4.23314	0.955181	-4.43177	9.34618e-06	0.000767315	-0.619542	0.802051	-0.772448	0.439849	0.915282	-4.80277	0.901683	-5.32646	1.00146e-07	6.76463e-06	CCDC85A
ENSG00000146674	3.44191	0.779189	4.4173	9.99421e-06	0.000809567	2.51617	0.854445	2.9448	0.00323163	0.158898	5.98811	0.968541	6.1826	6.30531e-10	8.67139e-08	IGFBP3
ENSG00000158865	-5.45206	1.23397	-4.41833	9.94682e-06	0.000809567	1.46159	1.07146	1.36411	0.172533	0.765269	-4.06079	1.04638	-3.88078	0.00010412	0.00170994	SLC5A11
ENSG00000118194	-4.92803	1.11579	-4.41664	1.00246e-05	0.000809567	1.18186	1.17577	1.00518	0.314811	0.867106	-3.72081	1.20922	-3.07704	0.00209068	0.0162132	TNNT2
ENSG00000112578	1.39726	0.317061	4.40693	1.04848e-05	0.000830272	-1.01966	0.52852	-1.92928	0.0536962	0.572261	0.42539	0.463843	0.917099	0.359091	0.592011	BYSL
ENSG00000100097	1.93766	0.439438	4.40941	1.03651e-05	0.000830272	0.203152	0.503457	0.403514	0.68657	0.968594	2.18514	0.429719	5.08505	3.67533e-07	2.06541e-05	LGALS1
ENSG00000173599	-1.58064	0.35859	-4.40793	1.04364e-05	0.000830272	-0.542797	0.490744	-1.10607	0.268696	0.843607	-2.07821	0.443071	-4.69046	2.72594e-06	9.53621e-05	PC
ENSG00000108352	-2.31922	0.526199	-4.40749	1.04575e-05	0.000830272	-0.0336956	0.673344	-0.0500421	0.960089	0.995885	-2.30825	0.627905	-3.6761	0.000236823	0.00321528	RAPGEFL1
ENSG00000070214	-1.61638	0.3668	-4.40671	1.04951e-05	0.000830272	-0.122078	0.431343	-0.283019	0.777162	0.982232	-1.68888	0.329888	-5.11956	3.06254e-07	1.78486e-05	SLC44A1
ENSG00000142609	-4.45749	1.0118	-4.40551	1.05533e-05	0.000831482	0.0299235	0.928372	0.0322322	0.974287	0.997418	-4.39753	1.01399	-4.33685	1.44539e-05	0.000349306	CFAP74
ENSG00000179218	1.5766	0.358129	4.40233	1.07096e-05	0.000833627	-0.711691	0.485656	-1.46542	0.142806	0.73372	0.916822	0.523642	1.75085	0.079971	0.226144	CALR
ENSG00000073712	1.47754	0.335576	4.403	1.06765e-05	0.000833627	-0.618416	0.423134	-1.46151	0.143875	0.736185	0.903796	0.349092	2.58899	0.00962578	0.0502612	FERMT2
ENSG00000179698	-2.10448	0.477883	-4.40376	1.06392e-05	0.000833627	0.0635413	0.666883	0.0952809	0.924092	0.993516	-2.01073	0.703114	-2.85975	0.0042398	0.0275486	WDR97
ENSG00000083845	1.47641	0.33628	4.39042	1.13131e-05	0.00087708	-0.345658	0.404017	-0.855552	0.392245	0.898741	1.18237	0.341329	3.46401	0.000532178	0.00587362	RPS5
ENSG00000054690	-2.97257	0.677297	-4.38887	1.13939e-05	0.000879829	1.18595	0.756358	1.56797	0.116888	0.694149	-1.75328	0.393974	-4.45025	8.5769e-06	0.000232562	PLEKHH1
ENSG00000164109	2.10848	0.480745	4.38586	1.1553e-05	0.000888572	-0.253927	0.535611	-0.474088	0.635437	0.962186	1.90333	0.537549	3.54076	0.00039898	0.00472839	MAD2L1
ENSG00000260788	-7.17382	1.63615	-4.38458	1.16208e-05	0.000890078	3.2172	1.16109	2.77085	0.00559108	0.214384	-4.52881	1.58119	-2.86418	0.00418085	NaN	AC009063.2
ENSG00000121898	-3.95323	0.901964	-4.38291	1.17103e-05	0.000890078	1.70353	0.610329	2.79117	0.00525181	0.207706	-2.22342	1.29574	-1.71595	0.0861714	NaN	CPXM2
ENSG00000136158	2.07105	0.472484	4.38331	1.16888e-05	0.000890078	-0.0366916	0.496483	-0.073903	0.941088	0.994037	2.09083	0.415077	5.03721	4.72372e-07	2.4568e-05	SPRY2
ENSG00000196169	-3.68479	0.841085	-4.38099	1.1814e-05	0.000892262	2.10924	0.83085	2.53865	0.0111281	0.305482	-1.53642	0.919345	-1.67121	0.0946801	0.25395	KIF19
ENSG00000197928	1.50078	0.342592	4.38068	1.18312e-05	0.000892262	0.179893	0.398461	0.45147	0.651651	0.964354	1.72733	0.40802	4.23344	2.30149e-05	0.000510978	ZNF677
ENSG00000264589	-3.27694	0.749084	-4.37459	1.21661e-05	0.000913968	-0.305731	0.763253	-0.400564	0.688741	0.968594	-3.56824	0.571908	-6.23919	4.3985e-10	6.41846e-08	MAPT-AS1
ENSG00000137807	2.54592	0.583221	4.36527	1.26965e-05	0.000950127	1.74498	0.728539	2.39517	0.0166124	0.371548	4.34178	0.657137	6.60712	3.9186e-11	8.61012e-09	KIF23
ENSG00000260077	-3.54997	0.81349	-4.36388	1.27776e-05	0.00095252	1.3927	0.669394	2.08055	0.0374754	0.516281	-2.11987	0.94825	-2.23556	0.0253809	NaN	AC104794.3
ENSG00000232406	-4.81186	1.10379	-4.35938	1.30433e-05	0.000968603	0.431028	0.917128	0.469976	0.638372	0.962186	-4.35799	1.09192	-3.99113	6.57581e-05	0.00119717	AL121895.1
ENSG00000136002	-1.59904	0.367021	-4.35682	1.31966e-05	0.000972531	0.584366	0.412492	1.41667	0.156579	0.751789	-0.979259	0.439549	-2.22787	0.0258889	0.10334	ARHGEF4
ENSG00000203852	3.21343	0.737504	4.35718	1.31751e-05	0.000972531	1.36032	1.00496	1.35361	0.175862	0.769757	4.61136	0.925548	4.9823	6.28324e-07	3.10363e-05	HIST2H3A
ENSG00000147459	-2.82962	0.65014	-4.35232	1.34702e-05	0.000988937	1.25453	0.784528	1.59908	0.109802	0.685602	-1.53267	0.619072	-2.47576	0.0132952	0.0639213	DOCK5
ENSG00000245293	-3.62698	0.833793	-4.34997	1.36155e-05	0.000992089	0.827954	0.811392	1.02041	0.307533	0.861591	-2.75696	0.882725	-3.12323	0.00178875	0.0144217	AC096564.1
ENSG00000137404	1.91181	0.439488	4.35008	1.3609e-05	0.000992089	-0.17857	0.673732	-0.265046	0.790974	0.983319	1.7767	0.547921	3.24263	0.00118433	0.0106741	NRM
ENSG00000167861	-2.06495	0.474826	-4.34886	1.36848e-05	0.000993405	0.396047	0.565331	0.700558	0.483579	0.928261	-1.62866	0.584753	-2.78521	0.00534936	0.0324013	HID1
ENSG00000158806	-3.67449	0.845787	-4.34446	1.39621e-05	0.00100975	0.155485	0.988232	0.157337	0.874979	0.990789	-3.47259	0.9318	-3.72675	NaN	NaN	NPM2
ENSG00000108187	-1.54067	0.355264	-4.3367	1.44636e-05	0.00104044	-0.196071	0.386153	-0.507755	0.611625	0.956567	-1.69006	0.350534	-4.82137	1.42577e-06	5.89934e-05	PBLD
ENSG00000140682	2.30591	0.531775	4.33624	1.44938e-05	0.00104044	0.510528	0.683255	0.747201	0.454943	0.920691	2.86253	0.687503	4.16366	3.1318e-05	0.000657885	TGFB1I1
ENSG00000114737	3.26458	0.753068	4.33504	1.45734e-05	0.00104229	-0.198778	0.754416	-0.263487	0.792175	0.983322	3.11578	0.854067	3.64817	0.000264118	0.00347959	CISH
ENSG00000163661	4.097	0.946431	4.3289	1.49858e-05	0.00106785	1.6986	0.89119	1.906	0.0566506	0.582333	5.82873	0.995555	5.85476	4.77711e-09	5.07329e-07	PTX3
ENSG00000154975	-4.07877	0.943201	-4.32439	1.52956e-05	0.00108246	-0.500475	0.741358	-0.675079	0.499626	0.932076	-4.52753	0.901945	-5.01974	5.17417e-07	2.647e-05	CA10
ENSG00000254635	-1.60805	0.371864	-4.32429	1.53025e-05	0.00108246	-0.284202	0.405536	-0.700804	0.483425	0.92808	-1.84968	0.436556	-4.23697	2.26555e-05	0.000504557	WAC-AS1
ENSG00000158445	-3.21332	0.743292	-4.3231	1.53855e-05	0.00108437	-0.706519	0.646426	-1.09296	0.27441	0.847111	-3.86266	0.648313	-5.95802	2.55319e-09	3.01276e-07	KCNB1
ENSG00000067167	1.07653	0.249287	4.31841	1.57156e-05	0.00110362	-0.0218799	0.419097	-0.0522073	0.958363	0.995876	1.10192	0.38331	2.87474	0.00404361	0.026615	TRAM1
ENSG00000273487	-4.60833	1.06878	-4.31177	1.61956e-05	0.00112915	0.532717	0.913313	0.58328	0.559705	0.946089	-4.06279	1.38396	-2.93563	0.00332876	NaN	AC104836.1
ENSG00000205116	-5.97301	1.3852	-4.31201	1.61776e-05	0.00112915	0.480808	0.943218	0.509752	0.610225	0.956567	-5.34027	1.47917	-3.61031	0.000305836	NaN	TMEM88B
ENSG00000175155	-1.68885	0.391763	-4.31089	1.62598e-05	0.00112956	0.10503	0.489666	0.214494	0.830162	0.985231	-1.53737	0.422757	-3.63653	0.000276336	0.00361069	YPEL2
ENSG00000012124	-4.10547	0.952861	-4.30857	1.6431e-05	0.00113738	1.60526	0.885928	1.81195	0.0699942	0.621961	-2.4814	0.925582	-2.68091	0.00734217	0.0410269	CD22
ENSG00000149257	2.2732	0.528992	4.29724	1.72939e-05	0.00119285	0.892975	0.631434	1.4142	0.157303	0.752376	3.2046	0.504062	6.35754	2.05004e-10	3.49899e-08	SERPINH1
ENSG00000166793	-2.57358	0.599824	-4.29056	1.78222e-05	0.00122493	-0.00344872	0.577772	-0.005969	0.995237	0.999574	-2.52941	0.622082	-4.06604	4.78186e-05	0.000917772	YPEL4
ENSG00000152377	-2.61929	0.611052	-4.28652	1.81492e-05	0.001243	-0.544746	0.629041	-0.865995	0.386493	0.896776	-3.1082	0.594811	-5.22553	1.73661e-07	1.08843e-05	SPOCK1
ENSG00000185739	-3.1875	0.745061	-4.27817	1.88438e-05	0.00128602	1.15058	0.630355	1.82529	0.0679572	0.616482	-1.9948	0.975687	-2.04451	0.0409036	NaN	SRL
ENSG00000138134	-2.50935	0.586658	-4.27736	1.89119e-05	0.00128614	-0.19244	0.455218	-0.422743	0.672483	0.966632	-2.65613	0.603319	-4.40253	1.06996e-05	0.000276398	STAMBPL1
ENSG00000148671	-3.46448	0.81053	-4.27434	1.91704e-05	0.00129916	0.812584	0.646616	1.25667	0.208872	0.797431	-2.60816	0.787614	-3.31147	0.000928066	0.008924	ADIRF
ENSG00000286558	-4.74546	1.11125	-4.27037	1.95153e-05	0.00131793	1.10654	0.81936	1.35049	0.17686	0.770289	-3.60645	1.25465	-2.87447	0.00404711	0.0266223	AC098679.5
ENSG00000275714	2.45399	0.575408	4.26477	2.00105e-05	0.00133076	-0.285445	0.669196	-0.426548	0.669708	0.966563	2.22507	0.646475	3.44185	0.000577751	0.00625739	HIST1H3A
ENSG00000167641	-3.22415	0.755643	-4.26677	1.98325e-05	0.00133076	0.919837	0.789327	1.16534	0.24388	0.829175	-2.26403	0.64369	-3.51727	0.000436005	0.00504928	PPP1R14A
ENSG00000161547	1.02109	0.239449	4.26435	2.00486e-05	0.00133076	-0.240372	0.381388	-0.630256	0.528527	0.942077	0.82699	0.323984	2.55256	0.0106935	0.054193	SRSF2
ENSG00000135426	-5.27205	1.23582	-4.26605	1.98964e-05	0.00133076	-0.0700561	1.71972	-0.040737	0.967506	0.997155	-5.32494	0.901748	-5.90512	3.5238e-09	3.8492e-07	TESPA1
ENSG00000102053	-4.27879	1.00306	-4.26572	1.99257e-05	0.00133076	-0.237793	0.540463	-0.43998	0.659952	0.966392	-4.47012	1.07934	-4.14152	3.45009e-05	0.000712224	ZC3H12B
ENSG00000267339	-5.47171	1.28338	-4.26353	2.0122e-05	0.00133108	-0.0333221	0.905961	-0.036781	0.97066	0.997418	-5.5628	1.13047	-4.92079	8.61935e-07	3.94181e-05	LINC00906
ENSG00000101310	1.3353	0.313383	4.26093	2.03579e-05	0.00134209	-1.08707	0.501879	-2.16601	0.0303107	0.481953	0.299636	0.468619	0.639402	0.522561	0.727919	SEC23B
ENSG00000234336	-4.59892	1.08013	-4.25775	2.0649e-05	0.00135668	0.0379418	0.870393	0.0435916	0.96523	0.996958	-4.49338	1.15225	-3.89964	9.63341e-05	0.00161537	JAZF1-AS1
ENSG00000206077	-4.03551	0.94913	-4.2518	2.12058e-05	0.00138855	1.10603	1.02339	1.08074	0.279811	0.850702	-2.88692	0.560448	-5.15109	2.58972e-07	1.55676e-05	ZDHHC11B
ENSG00000088387	-2.09997	0.494059	-4.25044	2.13353e-05	0.00139233	0.198073	0.488546	0.405434	0.685159	0.968408	-1.85824	0.552449	-3.36364	0.000769227	0.00775892	DOCK9
ENSG00000012232	1.65932	0.390682	4.24725	2.1641e-05	0.00140754	-0.302325	0.450329	-0.671343	0.502002	0.933262	1.40986	0.277808	5.07495	3.87606e-07	2.1353e-05	EXTL3
ENSG00000250934	-2.30994	0.544203	-4.24463	2.18957e-05	0.00141507	0.205165	0.517119	0.396747	0.691554	0.968795	-2.06461	0.613012	-3.36797	0.000757225	0.00767096	AC016924.1
ENSG00000250686	-7.2454	1.70699	-4.24455	2.19029e-05	0.00141507	0.435695	1.25601	0.346888	0.728675	0.975141	-6.82372	1.43569	-4.75293	2.00489e-06	7.66511e-05	KHDRBS2-OT
ENSG00000104626	1.66757	0.39301	4.24308	2.20474e-05	0.00141967	0.050132	0.569912	0.0879644	0.929905	0.993516	1.76016	0.491526	3.58102	0.000342259	0.00425952	ERI1
ENSG00000187837	1.7917	0.422966	4.23605	2.27491e-05	0.00146001	-0.638236	0.585689	-1.08972	0.275837	0.847353	1.20329	0.601623	2.00007	0.0454922	0.153374	HIST1H1C
ENSG00000118473	-2.44659	0.578231	-4.23116	2.32486e-05	0.00148225	-0.039387	0.643021	-0.061253	0.951158	0.995221	-2.4436	0.677957	-3.60436	0.000312923	0.00397993	SGIP1
ENSG00000182600	-3.23291	0.764033	-4.23137	2.32267e-05	0.00148225	1.74308	0.884909	1.96979	0.048863	0.559682	-1.47833	0.719868	-2.05361	0.0400136	0.14001	SNORC
ENSG00000115295	-1.33946	0.316782	-4.22832	2.35438e-05	0.00149615	0.289499	0.373851	0.774371	0.438711	0.91453	-1.00249	0.294127	-3.40835	0.000653575	0.0068988	CLIP4
ENSG00000105372	1.28872	0.3049	4.2267	2.37138e-05	0.00150203	0.121912	0.379482	0.321258	0.748015	0.978426	1.45663	0.348079	4.18477	2.85459e-05	0.000615202	RPS19
ENSG00000105011	2.41713	0.572003	4.22572	2.38175e-05	0.00150368	1.0831	0.974841	1.11105	0.266545	0.842693	3.53755	0.850235	4.16067	3.1731e-05	0.000662918	ASF1B
ENSG00000108387	-2.90914	0.688674	-4.22426	2.39727e-05	0.00150857	0.461419	0.728464	0.633414	0.526463	0.941295	-2.40109	0.471142	-5.09633	3.46304e-07	1.98797e-05	SEPTIN4
ENSG00000163624	-3.56057	0.843038	-4.2235	2.40539e-05	0.00150878	-0.172347	0.81201	-0.212248	0.831914	0.985431	-3.68199	0.789287	-4.66496	3.08681e-06	0.000105559	CDS1
ENSG00000112782	-3.40535	0.806562	-4.22206	2.42082e-05	0.00151356	-0.294411	0.700846	-0.420079	0.674428	0.966807	-3.66999	0.682752	-5.37528	7.64637e-08	5.3346e-06	CLIC5
ENSG00000159733	-1.7243	0.408686	-4.21913	2.45243e-05	0.00152839	0.491917	0.525437	0.936205	0.349168	0.881525	-1.19836	0.572299	-2.09393	0.0362659	0.13082	ZFYVE28
ENSG00000178538	-1.97424	0.468791	-4.21135	2.53852e-05	0.00157505	1.28906	0.576177	2.23726	0.0252695	0.443064	-0.653564	0.614521	-1.06353	0.28754	0.518695	CA8
ENSG00000016602	-6.44613	1.53082	-4.2109	2.54355e-05	0.00157505	1.34408	1.19651	1.12333	0.261299	0.841922	-5.1305	1.50026	-3.41974	0.000626816	NaN	CLCA4
ENSG00000112118	1.54098	0.366107	4.20909	2.56396e-05	0.00158263	-0.482411	0.507908	-0.949801	0.342214	0.878597	1.10405	0.476018	2.31935	0.020376	0.0874903	MCM3
ENSG00000173110	2.41089	0.573013	4.20738	2.58343e-05	0.00158959	1.7844	0.614632	2.9032	0.00369376	0.16954	4.23385	0.625125	6.77281	1.26308e-11	3.21933e-09	HSPA6
ENSG00000100625	1.804	0.428999	4.20514	2.60917e-05	0.00160034	-0.809962	0.56173	-1.44191	0.149329	0.74204	1.05287	0.447498	2.35279	0.0186333	0.0821668	SIX4
ENSG00000176945	-2.48851	0.592247	-4.20181	2.64784e-05	0.00161894	1.17444	0.809175	1.4514	0.146669	0.739841	-1.27341	0.952862	-1.3364	0.181418	0.389588	MUC20
ENSG00000167702	-1.63009	0.388165	-4.19949	2.6752e-05	0.00163053	0.47615	0.61152	0.778634	0.436195	0.913335	-1.11723	0.61219	-1.82497	0.0680061	0.202892	KIFC2
ENSG00000109107	-2.02662	0.483063	-4.19535	2.72455e-05	0.00165144	-1.88238	0.611773	-3.07693	0.00209147	0.124392	-3.85383	0.613942	-6.27719	3.4475e-10	5.2722e-08	ALDOC
ENSG00000013297	-3.23951	0.772328	-4.19447	2.73507e-05	0.00165144	0.729826	0.851692	0.856913	0.391493	0.898741	-2.46329	0.568586	-4.33231	1.47555e-05	0.000355246	CLDN11
ENSG00000101955	2.64005	0.629383	4.19466	2.73276e-05	0.00165144	-1.91423	0.866231	-2.20983	0.0271167	0.457767	0.772018	0.864077	0.893459	0.371611	0.603647	SRPX
ENSG00000163110	1.4418	0.343848	4.19312	2.75142e-05	0.00165615	-1.33868	0.527814	-2.53628	0.0112037	0.306274	0.150348	0.517247	0.29067	0.771304	0.887802	PDLIM5
ENSG00000134333	1.38814	0.331466	4.18788	2.81571e-05	0.0016896	0.632034	0.432794	1.46036	0.144192	0.736865	2.05813	0.456114	4.51231	6.41265e-06	0.00018583	LDHA
ENSG00000124562	1.34707	0.321742	4.18679	2.8293e-05	0.00169252	-0.500057	0.38414	-1.30176	0.192999	0.783283	0.895622	0.354713	2.52492	0.0115725	0.0571777	SNRPC
ENSG00000101158	1.14519	0.274059	4.17862	2.93277e-05	0.00174901	-0.358823	0.343019	-1.04607	0.295527	0.85608	0.832938	0.313379	2.65793	0.00786231	0.043081	NELFCD
ENSG00000074276	-3.90597	0.935251	-4.17639	2.9617e-05	0.00176085	0.919556	0.866217	1.06158	0.288428	0.853948	-2.94452	1.06408	-2.76721	0.00565386	NaN	CDHR2
ENSG00000004799	-2.58092	0.618224	-4.17474	2.98333e-05	0.00176828	0.592993	0.588125	1.00828	0.313322	0.86593	-1.95308	0.661204	-2.95382	0.00313863	0.0220215	PDK4
ENSG00000279586	-3.29072	0.788504	-4.17337	3.00132e-05	0.00177353	1.19727	0.712758	1.67977	0.0930025	0.666663	-2.03153	1.1521	-1.76332	0.077846	NaN	AP000711.1
ENSG00000167747	1.72392	0.413595	4.16812	3.07119e-05	0.00180929	0.126429	0.420276	0.300824	0.763549	0.982196	1.89369	0.463559	4.08512	4.40547e-05	0.00086463	C19orf48
ENSG00000124749	-3.57097	0.857258	-4.16557	3.10581e-05	0.00181329	0.937236	0.998709	0.938447	0.348015	0.881525	-2.64306	1.42655	-1.85276	NaN	NaN	COL21A1
ENSG00000124134	-4.42218	1.06161	-4.16555	3.10604e-05	0.00181329	0.884681	1.12295	0.787816	0.430804	0.911613	-3.48884	0.743851	-4.69025	2.72877e-06	9.53621e-05	KCNS1
ENSG00000164124	-3.05697	0.733723	-4.16638	3.0947e-05	0.00181329	0.765699	0.760882	1.00633	0.314256	0.866442	-2.24884	0.629605	-3.57182	0.000354506	0.00434685	TMEM144
ENSG00000228252	-5.79704	1.39209	-4.16427	3.12344e-05	0.00181797	2.23144	1.08732	2.05224	0.0401465	0.524078	-3.28462	1.67469	-1.96133	0.04984	NaN	COL6A4P2
ENSG00000054148	1.03292	0.248212	4.16145	3.1623e-05	0.00183508	-0.648391	0.439802	-1.47428	0.140406	0.729493	0.432552	0.40874	1.05826	0.289938	0.52132	PHPT1
ENSG00000187134	-3.83827	0.922615	-4.16021	3.17956e-05	0.00183959	-1.1525	0.623252	-1.84917	0.0644334	0.607367	-4.93306	0.994786	-4.95892	7.08869e-07	3.40471e-05	AKR1C1
ENSG00000281969	-3.73145	0.897262	-4.15871	3.20044e-05	0.00184616	-0.283562	0.61123	-0.46392	0.642705	0.96361	-3.97004	0.982307	-4.04155	5.30994e-05	0.00100301	AL592158.1
ENSG00000280809	-4.36012	1.04865	-4.15786	3.21248e-05	0.00184761	-1.0989	0.890533	-1.23398	0.217208	0.807422	-5.47162	0.864177	-6.3316	2.42631e-10	3.99839e-08	LINC00836
ENSG00000197444	-2.92395	0.703519	-4.15618	3.2361e-05	0.00185569	0.138146	0.826703	0.167105	0.867287	0.990467	-2.74058	0.590517	-4.64099	3.46749e-06	0.00011496	OGDHL
ENSG00000128645	-4.395	1.05768	-4.1553	3.24859e-05	0.00185735	1.03083	1.09108	0.944779	0.344772	0.880047	-3.33758	1.61116	-2.07154	0.0383084	NaN	HOXD1
ENSG00000167995	-2.69779	0.65059	-4.14669	3.37322e-05	0.0019133	0.269174	0.601074	0.447823	0.654281	0.965759	-2.38108	0.667323	-3.56811	0.000359565	0.00438917	BEST1
ENSG00000125430	3.82225	0.921803	4.14649	3.37606e-05	0.0019133	1.06793	0.587269	1.81846	0.068994	0.619151	4.92458	1.02088	4.82387	1.408e-06	5.86391e-05	HS3ST3B1
ENSG00000163710	3.65324	0.881044	4.14649	3.37606e-05	0.0019133	-0.522944	0.783727	-0.667253	0.504611	0.933667	3.15637	0.911126	3.46425	0.000531712	0.00587187	PCOLCE2
ENSG00000280061	-4.40052	1.06203	-4.14351	3.42024e-05	0.00193269	0.661737	0.889248	0.744153	0.456784	0.921859	-3.70121	0.985565	-3.75542	0.000173054	0.00254303	AC011504.1
ENSG00000184144	-4.16013	1.00438	-4.142	3.4429e-05	0.00193983	0.942417	0.803553	1.17281	0.240871	0.828351	-3.17571	0.932808	-3.40446	0.000662941	0.00696689	CNTN2
ENSG00000142945	2.62654	0.634555	4.13919	3.48537e-05	0.00195807	1.98169	0.625666	3.16733	0.00153845	0.103861	4.6496	0.697366	6.66738	2.60417e-11	5.99775e-09	KIF2C
ENSG00000106617	-1.82463	0.441159	-4.136	3.53418e-05	0.00197975	0.327948	0.448495	0.731219	0.464645	0.925346	-1.45666	0.520274	-2.79979	0.00511362	0.0314315	PRKAG2
ENSG00000214376	-3.41258	0.825661	-4.13315	3.5783e-05	0.00199869	-0.174132	0.653848	-0.266319	0.789994	0.983319	-3.54115	0.750499	-4.71839	2.37715e-06	8.63907e-05	VSTM5
ENSG00000151150	-2.82261	0.683084	-4.13215	3.59388e-05	0.00200162	-0.148676	0.696374	-0.2135	0.830937	0.985231	-2.92405	0.738797	-3.95785	7.5628e-05	0.00133034	ANK3
ENSG00000134508	-2.93509	0.710481	-4.13112	3.60994e-05	0.00200481	-0.341941	0.734997	-0.465227	0.641769	0.963502	-3.22852	0.589315	-5.47843	4.29121e-08	3.30769e-06	CABLES1
ENSG00000244062	-4.1245	0.999157	-4.12798	3.65969e-05	0.00202663	0.711969	0.769838	0.92483	0.355054	0.883039	-3.38057	0.968849	-3.48926	0.000484357	0.00546625	AC080128.1
ENSG00000010379	-2.98626	0.723822	-4.12569	3.69627e-05	0.00204105	0.349549	0.667282	0.52384	0.60039	0.955559	-2.59461	0.653504	-3.9703	7.17824e-05	0.00128198	SLC6A13
ENSG00000113368	1.9799	0.480096	4.12396	3.72418e-05	0.00205062	0.637176	0.602976	1.05672	0.29064	0.853956	2.65812	0.56508	4.70397	2.55146e-06	9.13367e-05	LMNB1
ENSG00000067836	-1.96432	0.47695	-4.1185	3.81342e-05	0.00209382	0.112996	0.495554	0.22802	0.819631	0.984454	-1.80449	0.469223	-3.8457	0.000120209	0.00191129	ROGDI
ENSG00000274750	2.80196	0.681285	4.11275	3.90967e-05	0.00213457	0.907414	0.705066	1.28699	0.198097	0.788018	3.76294	0.761091	4.94413	7.64834e-07	3.62793e-05	HIST1H3E
ENSG00000112902	1.63996	0.398703	4.11324	3.90138e-05	0.00213457	-1.17118	0.563253	-2.07931	0.0375885	0.516281	0.514334	0.595343	0.863929	0.387627	0.618624	SEMA5A
ENSG00000287684	-3.59484	0.875029	-4.10825	3.98674e-05	0.00217053	0.734381	0.636418	1.15393	0.248529	0.833572	-2.8141	0.935039	-3.00961	0.00261587	0.019292	AL392172.2
ENSG00000267432	-6.44394	1.57091	-4.10204	4.09532e-05	0.00222143	1.4103	1.14231	1.2346	0.216979	0.807422	-4.88378	1.60569	-3.04155	0.00235363	NaN	DNAH17-AS1
ENSG00000180596	1.99048	0.485294	4.10159	4.10315e-05	0.00222143	-0.897916	0.623451	-1.44024	0.149801	0.74204	1.1442	0.540369	2.11744	0.0342225	0.125969	HIST1H2BC
ENSG00000070601	-1.91314	0.466561	-4.10052	4.12226e-05	0.00222556	-0.717191	0.525499	-1.36478	0.172322	0.765269	-2.57973	0.553392	-4.66167	3.13654e-06	0.000106877	FRMPD1
ENSG00000182704	2.17535	0.530873	4.09769	4.17298e-05	0.00224669	-0.0596077	0.628892	-0.094782	0.924488	0.993516	2.15844	0.616904	3.49882	0.000467326	0.00530802	TSKU
ENSG00000081479	-4.03428	0.984732	-4.09684	4.18834e-05	0.00224871	1.05607	0.858772	1.22974	0.218795	0.808188	-2.93406	0.917487	-3.19794	0.00138415	0.0120031	LRP2
ENSG00000276832	-4.28806	1.04812	-4.09118	4.29177e-05	0.00229787	0.813494	0.767729	1.05961	0.289321	0.853948	-3.4413	1.17039	-2.94029	0.00327908	NaN	AL354718.3
ENSG00000233058	-1.64776	0.402851	-4.09024	4.30928e-05	0.00230089	1.02933	0.818423	1.2577	0.208499	0.797036	-0.594868	0.867583	-0.685661	NaN	NaN	LINC00884
ENSG00000228903	-2.06577	0.505372	-4.08762	4.35827e-05	0.00232066	0.441785	0.562153	0.78588	0.431938	0.911931	-1.58188	0.378868	-4.17528	2.97626e-05	0.000632309	RASA4CP
ENSG00000106258	-4.91181	1.20261	-4.08429	4.42111e-05	0.00234767	2.27624	1.24366	1.83027	0.06721	0.615282	-2.61941	1.34069	-1.95378	0.0507277	0.16517	CYP3A5
ENSG00000100297	1.83378	0.449148	4.08281	4.4495e-05	0.00235629	-0.568433	0.605617	-0.938602	0.347935	0.881525	1.30573	0.529844	2.46436	0.0137258	0.0655136	MCM5
ENSG00000123485	3.21674	0.788287	4.08068	4.4905e-05	0.00237152	0.998143	0.955359	1.04478	0.296123	0.85608	4.25465	0.942484	4.51429	6.35289e-06	0.000184562	HJURP
ENSG00000134690	2.41115	0.591367	4.07725	4.55715e-05	0.00237437	1.71603	0.702259	2.44359	0.014542	0.349357	4.1649	0.707658	5.88548	3.969e-09	4.28652e-07	CDCA8
ENSG00000058453	-1.635	0.400871	-4.07863	4.53025e-05	0.00237437	1.30532	0.598743	2.1801	0.0292497	0.474348	-0.302448	0.58022	-0.521263	0.602183	0.78133	CROCC
ENSG00000206341	2.41908	0.593009	4.07934	4.51644e-05	0.00237437	-0.072218	0.606898	-0.118995	0.905279	0.991758	2.40107	0.75969	3.16059	0.00157448	0.0131604	HLA-H
ENSG00000177425	-3.00294	0.736313	-4.07835	4.53568e-05	0.00237437	1.82352	0.637119	2.86213	0.00420807	0.182768	-1.14118	0.85048	-1.34181	0.179659	0.386926	PAWR
ENSG00000169291	-2.38231	0.58423	-4.0777	4.54841e-05	0.00237437	-0.06356	0.600559	-0.105835	0.915714	0.992525	-2.39306	0.545408	-4.38765	1.14583e-05	0.000291273	SHE
ENSG00000188162	-5.81422	1.42678	-4.07505	4.60042e-05	0.00239049	2.44405	1.26165	1.93719	0.0527219	0.57029	-3.47059	1.51488	-2.291	0.0219635	NaN	OTOG
ENSG00000074706	-3.39627	0.833684	-4.0738	4.62517e-05	0.00239195	-0.043362	0.871316	-0.0497661	0.960309	0.995994	-3.38961	0.688464	-4.92344	8.50362e-07	3.92525e-05	IPCEF1
ENSG00000185634	2.00728	0.492745	4.07366	4.62791e-05	0.00239195	-1.15643	0.5844	-1.97884	0.0478346	0.554713	0.900693	0.670223	1.34387	0.17899	0.386052	SHC4
ENSG00000133657	1.28361	0.315343	4.07052	4.69078e-05	0.002418	-0.219304	0.336936	-0.650877	0.515126	0.937837	1.10783	0.364092	3.04272	0.00234451	0.0176795	ATP13A3
ENSG00000172350	-2.89072	0.710848	-4.06659	4.77068e-05	0.00245266	0.0640325	0.726944	0.0880846	0.929809	0.993516	-2.77921	0.744295	-3.73402	0.000188451	0.00270855	ABCG4
ENSG00000164972	-3.92601	0.96637	-4.06264	4.8521e-05	0.00248219	0.792144	0.924542	0.856796	0.391558	0.898741	-3.07916	1.07093	-2.87523	0.00403738	0.026598	C9orf24
ENSG00000160183	-4.34428	1.06935	-4.06256	4.85374e-05	0.00248219	1.57921	0.827866	1.90757	0.0564466	0.582273	-2.67254	1.32947	-2.01023	0.0444072	NaN	TMPRSS3
ENSG00000021300	-2.06527	0.509005	-4.05745	4.96109e-05	0.00253042	-0.656635	0.641155	-1.02414	0.305767	0.859896	-2.66384	0.543913	-4.89755	9.70377e-07	4.32394e-05	PLEKHB1
ENSG00000154262	-2.61702	0.645379	-4.05501	5.0132e-05	0.00255028	0.46299	0.777627	0.595388	0.551584	0.945972	-2.10927	0.753482	-2.79936	0.00512038	0.0314622	ABCA6
ENSG00000129038	2.8748	0.709563	4.0515	5.08895e-05	0.00258204	0.442495	0.629387	0.703057	0.48202	0.92808	3.35592	0.749772	4.47592	7.60836e-06	0.000212014	LOXL1
ENSG00000157782	-4.78992	1.18311	-4.04859	5.15266e-05	0.00259813	-0.420064	1.18896	-0.353303	0.723861	0.973789	-5.15782	0.901024	-5.7244	1.03799e-08	1.01236e-06	CABP1
ENSG00000170961	2.07416	0.512363	4.04822	5.16087e-05	0.00259813	0.489442	0.803569	0.609085	0.542468	0.943594	2.61573	0.67494	3.87549	0.00010641	0.00174304	HAS2
ENSG00000175287	-2.33522	0.576705	-4.04924	5.13837e-05	0.00259813	0.632446	0.491678	1.2863	0.198338	0.788018	-1.66232	0.678047	-2.45163	0.014221	0.0672558	PHYHD1
ENSG00000105894	1.47953	0.365772	4.04494	5.23359e-05	0.00262791	0.129795	0.434107	0.298994	0.764945	0.982232	1.64754	0.352172	4.67821	2.89383e-06	0.000100215	PTN
ENSG00000131771	-4.11621	1.01827	-4.04235	5.29175e-05	0.00265025	0.53829	0.95631	0.562882	0.573515	0.94808	-3.52414	0.810344	-4.34894	1.36799e-05	0.000335262	PPP1R1B
ENSG00000135549	3.41509	0.846191	4.03584	5.44069e-05	0.00270676	-0.00937448	0.961776	-0.00974705	0.992223	0.999574	3.45571	0.813149	4.24979	2.13972e-05	0.000485207	PKIB
ENSG00000109113	1.43613	0.355779	4.03659	5.42328e-05	0.00270676	1.57568	0.580626	2.71375	0.00665254	0.229932	3.04433	0.561621	5.42062	5.93934e-08	4.28439e-06	RAB34
ENSG00000179292	-3.16398	0.784019	-4.03559	5.44648e-05	0.00270676	-0.247537	0.78117	-0.31688	0.751335	0.979332	-3.36286	0.574284	-5.85575	4.74872e-09	5.07132e-07	TMEM151A
ENSG00000100105	1.09314	0.271205	4.0307	5.56107e-05	0.00275664	-1.33793	0.52713	-2.53814	0.0111445	0.305511	-0.192889	0.498193	-0.387176	0.698626	0.844077	PATZ1
ENSG00000267665	-3.91551	0.972517	-4.02617	5.66937e-05	0.00280316	0.434861	0.976419	0.445363	0.656057	0.965988	-3.30379	1.49335	-2.21233	0.0269435	NaN	AC021683.3
ENSG00000128805	-2.65283	0.659401	-4.02309	5.74404e-05	0.00281215	1.05957	0.697105	1.51996	0.128521	0.709617	-1.54628	0.408781	-3.78266	0.000155162	0.00234288	ARHGAP22
ENSG00000183317	-3.82805	0.95133	-4.02389	5.7244e-05	0.00281215	-0.43438	0.847147	-0.512756	0.608122	0.956144	-4.20785	0.827571	-5.08458	3.68438e-07	2.06541e-05	EPHA10
ENSG00000105438	1.56422	0.388817	4.02302	5.74559e-05	0.00281215	0.193959	0.400458	0.484344	0.628142	0.960017	1.80815	0.369369	4.89525	9.8183e-07	4.35457e-05	KDELR1
ENSG00000174599	-4.44272	1.10395	-4.02439	5.71242e-05	0.00281215	-0.401739	0.64926	-0.618764	0.536072	0.943157	-4.82938	1.08122	-4.4666	7.94709e-06	0.000219216	TRAM1L1
ENSG00000135476	2.38395	0.593024	4.01998	5.82024e-05	0.00284151	1.54613	0.864439	1.78859	0.0736803	0.629854	3.9763	0.864827	4.5978	4.26969e-06	0.000134908	ESPL1
ENSG00000066468	-2.55686	0.636618	-4.01632	5.91137e-05	0.00287875	1.33451	0.6277	2.12603	0.033501	0.500128	-1.18382	0.664095	-1.78261	0.0746491	0.216342	FGFR2
ENSG00000180929	-4.608	1.1484	-4.01253	6.00715e-05	0.00291806	0.71063	0.973066	0.7303	0.465207	0.925346	-3.86284	0.968043	-3.99036	6.59725e-05	0.00119879	GPR62
ENSG00000123080	1.80281	0.449744	4.00853	6.10989e-05	0.00295316	1.45283	0.519263	2.79786	0.00514419	0.204257	3.29759	0.484266	6.80947	9.79575e-12	2.56514e-09	CDKN2C
ENSG00000198901	2.32294	0.579434	4.00897	6.0983e-05	0.00295316	0.294573	0.524078	0.562078	0.574063	0.948337	2.66329	0.642519	4.14508	3.39692e-05	0.000702765	PRC1
ENSG00000215241	-1.52627	0.38089	-4.00713	6.14621e-05	0.00296333	-0.209859	0.508435	-0.412754	0.679787	0.967491	-1.69197	0.516616	-3.2751	0.00105625	0.00979208	LINC02449
ENSG00000154263	-3.12024	0.779783	-4.00142	6.29623e-05	0.00302593	0.329399	0.793514	0.415115	0.678058	0.967429	-2.75281	0.775193	-3.55112	0.000383591	0.00460093	ABCA10
ENSG00000155792	-2.74746	0.686691	-4.00101	6.30726e-05	0.00302593	-0.0324401	0.67661	-0.047945	0.96176	0.996417	-2.73061	0.536297	-5.0916	3.55054e-07	2.01401e-05	DEPTOR
ENSG00000120549	-1.48789	0.372057	-3.99908	6.35879e-05	0.00304301	0.307764	0.471724	0.652425	0.514127	0.937837	-1.13587	0.385632	-2.94546	0.00322472	0.0225142	KIAA1217
ENSG00000170892	1.72223	0.430718	3.99851	6.37427e-05	0.00304301	-0.493993	0.507909	-0.972601	0.330752	0.873104	1.27363	0.506301	2.51556	0.0118842	0.0583555	TSEN34
ENSG00000228408	-4.47968	1.12115	-3.99561	6.45289e-05	0.00307297	-0.901861	0.944265	-0.955093	0.339531	0.877867	-5.34032	1.15137	-4.63822	3.51418e-06	0.000116023	AL031056.1
ENSG00000169891	-4.11124	1.02923	-3.99449	6.48335e-05	0.00307991	-0.227912	0.793808	-0.287113	0.774026	0.982232	-4.28526	1.00484	-4.26462	2.0024e-05	0.000460071	REPS2
ENSG00000258472	-2.22553	0.557262	-3.99369	6.50522e-05	0.00308274	0.100457	0.652793	0.153888	0.877698	0.990789	-2.07958	0.639813	-3.25029	0.00115285	0.0104668	AC005726.1
ENSG00000140931	2.0386	0.510789	3.99108	6.57732e-05	0.00309421	-0.317073	0.710795	-0.446082	0.655538	0.965955	1.76421	0.614286	2.87197	0.00407918	0.0267907	CMTM3
ENSG00000144550	-4.01782	1.00666	-3.99124	6.57294e-05	0.00309421	-0.573343	0.937566	-0.611522	0.540854	0.943247	-4.57953	1.04389	-4.38698	1.14934e-05	0.000291777	CPNE9
ENSG00000168268	1.47074	0.368502	3.99114	6.57565e-05	0.00309421	-0.033695	0.568216	-0.0592997	0.952713	0.995221	1.48266	0.489286	3.03025	0.00244353	0.0182677	NT5DC2
ENSG00000251503	-3.73528	0.93784	-3.98285	6.80933e-05	0.00319561	-0.518779	0.771117	-0.672763	0.501098	0.932987	-4.17974	0.909312	-4.5966	4.29441e-06	0.000135465	CENPS-CORT
ENSG00000173281	2.55638	0.642065	3.98149	6.84834e-05	0.00320615	-0.0834653	0.755211	-0.110519	0.911998	0.992092	2.51693	0.745322	3.37697	0.000732891	0.00747197	PPP1R3B
ENSG00000120875	2.29123	0.5759	3.97852	6.93463e-05	0.00323094	0.118715	0.711492	0.166854	0.867485	0.990467	2.45207	0.537942	4.55825	5.15807e-06	0.000157259	DUSP4
ENSG00000232504	-2.69523	0.677395	-3.97882	6.92584e-05	0.00323094	0.808804	0.642733	1.25838	0.208254	0.797036	-1.8441	0.655519	-2.81319	0.00490532	0.0305381	ST3GAL5-AS1
ENSG00000075218	2.33861	0.587945	3.9776	6.96131e-05	0.00323559	1.17697	0.715266	1.64551	0.0998657	0.673996	3.56296	0.702652	5.07073	3.96301e-07	2.17692e-05	GTSE1
ENSG00000185130	2.62872	0.661649	3.97299	7.09772e-05	0.00324453	0.0642042	0.690535	0.0929775	0.925921	0.993516	2.7366	0.728736	3.75527	0.000173154	0.00254303	HIST1H2BL
ENSG00000183837	-3.7109	0.933481	-3.97533	7.02812e-05	0.00324453	0.0301426	0.964427	0.0312544	0.975067	0.997418	-3.63088	0.816214	-4.44843	8.64985e-06	0.000234208	PNMA3
ENSG00000184486	1.80826	0.455113	3.97322	7.0907e-05	0.00324453	-0.69606	0.520507	-1.33727	0.181134	0.774297	1.16783	0.533658	2.18835	0.0286438	0.111269	POU3F2
ENSG00000079337	-2.77658	0.698586	-3.97457	7.05064e-05	0.00324453	0.406211	0.568087	0.71505	0.474578	0.92619	-2.32885	0.66918	-3.48015	0.000501134	0.00558908	RAPGEF3
ENSG00000100784	-2.12916	0.535863	-3.97333	7.08744e-05	0.00324453	-0.425287	0.586313	-0.725358	0.468232	0.92574	-2.49611	0.362667	-6.88263	5.87576e-12	1.65178e-09	RPS6KA5
ENSG00000165480	2.47943	0.62358	3.97613	7.0046e-05	0.00324453	0.997241	0.697655	1.42942	0.152884	0.744896	3.52072	0.747047	4.71285	2.44279e-06	8.79404e-05	SKA3
ENSG00000112773	2.22537	0.559983	3.97399	7.06796e-05	0.00324453	1.38567	0.635228	2.18137	0.0291563	0.47335	3.64525	0.516574	7.0566	1.7063e-12	5.26092e-10	TENT5A
ENSG00000257803	3.73821	0.94165	3.96985	7.19193e-05	0.00327986	0.83688	1.82606	0.458299	0.646738	NaN	4.62283	1.16047	3.9836	6.78794e-05	0.00122641	AC010200.1
ENSG00000250067	-2.94325	0.742662	-3.9631	7.39822e-05	0.00336601	0.324617	0.880604	0.36863	0.712403	0.972443	-2.57448	0.701667	-3.6691	0.000243408	0.00328834	YJEFN3
ENSG00000214309	-1.83945	0.464375	-3.96114	7.45928e-05	0.00337828	0.453428	0.565397	0.801965	0.422573	0.90782	-1.34627	0.597516	-2.25311	0.0242519	0.0989329	MBLAC1
ENSG00000181322	-2.50878	0.633353	-3.96112	7.46003e-05	0.00337828	-0.0416706	0.589687	-0.0706656	0.943664	0.994659	-2.50686	0.686617	-3.65103	0.000261194	0.0034482	NME9
ENSG00000068400	-1.1814	0.298442	-3.95855	7.54072e-05	0.00340686	0.388845	0.433701	0.896574	0.369946	0.88995	-0.750777	0.424689	-1.76783	0.0770894	0.220704	GRIPAP1
ENSG00000158560	-3.48245	0.880504	-3.95507	7.65125e-05	0.00343936	0.222387	0.657995	0.337976	0.735381	0.976834	-3.21466	0.985259	-3.26276	0.00110333	0.0101012	DYNC1I1
ENSG00000254838	-1.95663	0.494705	-3.95514	7.649e-05	0.00343936	0.878381	0.69114	1.27092	0.203759	0.793223	-1.04998	0.754343	-1.39191	0.163949	0.365189	GVINP1
ENSG00000127083	-6.36401	1.60926	-3.95461	7.66589e-05	0.00343936	1.79952	1.19477	1.50617	0.132023	0.716387	-4.64253	1.69354	-2.74132	0.00611928	NaN	OMD
ENSG00000164398	-2.29957	0.582255	-3.94942	7.83421e-05	0.00347587	-1.07903	0.49131	-2.19622	0.0280762	0.46705	-3.32344	0.555425	-5.9836	2.18263e-09	2.6241e-07	ACSL6
ENSG00000231187	-2.40563	0.608931	-3.95058	7.79629e-05	0.00347587	-1.05448	0.662183	-1.59243	0.111289	0.686062	-3.4076	0.521932	-6.52882	6.62915e-11	1.34812e-08	AL356056.2
ENSG00000114790	1.49637	0.378887	3.94937	7.83563e-05	0.00347587	-1.00485	0.5505	-1.82533	0.0679505	0.616482	0.538058	0.524017	1.02679	0.304517	0.536462	ARHGEF26
ENSG00000116991	1.0716	0.271338	3.94933	7.83693e-05	0.00347587	-0.191763	0.401658	-0.477429	0.633057	0.961477	0.922477	0.375658	2.45563	0.0140638	0.0666502	SIPA1L2
ENSG00000119121	-4.20757	1.06536	-3.94944	7.83327e-05	0.00347587	-0.370325	0.960897	-0.385396	0.699944	0.971313	-4.53298	1.01933	-4.44701	8.70734e-06	0.000235431	TRPM6
ENSG00000213719	2.04334	0.517875	3.94562	7.95948e-05	0.00350615	1.58399	0.575486	2.75244	0.00591534	0.217911	3.66626	0.510614	7.1801	6.96623e-13	2.42121e-10	CLIC1
ENSG00000170370	-4.67485	1.18462	-3.94629	7.93718e-05	0.00350615	0.546624	1.01509	0.538499	0.590232	0.95188	-4.07751	0.938377	-4.34528	1.39097e-05	0.000338724	EMX2
ENSG00000164659	-3.0327	0.768589	-3.94581	7.95319e-05	0.00350615	0.505992	0.474913	1.06544	0.286676	0.853485	-2.48515	0.845423	-2.93953	0.00328706	0.0228161	KIAA1324L
ENSG00000278654	-3.90956	0.991956	-3.94126	8.10545e-05	0.00356236	0.6942	0.856376	0.810625	0.417581	0.904994	-3.17003	1.23767	-2.56128	0.0104287	NaN	AC007450.4
ENSG00000082175	-4.9538	1.25741	-3.93969	8.15865e-05	0.00357762	0.27942	1.03867	0.269016	0.787917	0.983129	-4.69452	1.12476	-4.17381	2.99549e-05	0.000634832	PGR
ENSG00000169031	-3.63311	0.922326	-3.93907	8.17964e-05	0.00357873	0.550162	0.870882	0.63173	0.527563	0.941886	-3.06598	0.937544	-3.27023	0.00107461	0.00991421	COL4A3
ENSG00000088882	2.72085	0.690842	3.93846	8.20075e-05	0.00357905	-0.893128	0.806844	-1.10694	0.268319	0.843552	1.86516	0.642062	2.90495	0.0036731	0.0246368	CPXM1
ENSG00000129562	1.36827	0.347455	3.93797	8.21729e-05	0.00357905	-1.29267	0.542491	-2.38284	0.0171798	0.376313	0.130584	0.52127	0.250512	0.802192	0.904783	DAD1
ENSG00000100926	1.48023	0.375945	3.93736	8.23834e-05	0.00358017	-0.53713	0.496572	-1.08168	0.279396	0.850255	0.993699	0.467205	2.1269	0.0334281	0.123746	TM9SF1
ENSG00000184350	-5.04402	1.28188	-3.93485	8.32474e-05	0.00360962	3.94075	1.05439	3.73746	0.000185885	0.0302434	-1.11512	2.06804	-0.539216	0.589738	NaN	MRGPRE
ENSG00000107902	-2.68382	0.682629	-3.93159	8.43854e-05	0.0036508	0.313116	0.715015	0.437915	0.661448	0.966563	-2.32477	0.498146	-4.66685	3.05857e-06	0.000105154	LHPP
ENSG00000166710	2.07563	0.528165	3.92989	8.49851e-05	0.00366638	-0.474103	0.558188	-0.849361	0.39568	0.899001	1.65874	0.678294	2.44545	0.014467	0.0680322	B2M
ENSG00000172716	-2.6627	0.677618	-3.9295	8.51238e-05	0.00366638	1.10858	0.730986	1.51655	0.129379	0.71091	-1.52759	0.535344	-2.85347	0.00432445	0.0278995	SLFN11
ENSG00000172965	1.37374	0.350081	3.92406	8.70684e-05	0.00373354	1.45116	0.558437	2.5986	0.00936047	0.277171	2.86015	0.579369	4.93666	7.94713e-07	3.73261e-05	MIR4435-2HG
ENSG00000226964	-2.9858	0.760814	-3.92448	8.6917e-05	0.00373354	0.651177	0.557155	1.16875	0.242503	0.828947	-2.28858	0.842452	-2.71658	0.0065961	0.0377631	RHEBP2
ENSG00000163479	1.50961	0.384834	3.92276	8.75385e-05	0.00374541	-0.492735	0.457772	-1.07638	0.281759	0.852157	1.06081	0.455436	2.32922	0.0198476	0.085936	SSR2
ENSG00000205959	-2.22982	0.568999	-3.91885	8.89732e-05	0.00379841	0.281455	0.802805	0.350589	0.725897	0.974158	-1.89523	0.864073	-2.19337	0.028281	0.110308	AC105345.1
ENSG00000170348	1.67646	0.428079	3.91624	8.99416e-05	0.00383131	-0.247789	0.524584	-0.472354	0.636674	0.962186	1.47848	0.492721	3.00065	0.00269403	0.0197192	TMED10
ENSG00000137812	3.10358	0.792627	3.91556	9.01949e-05	0.00383368	0.252663	0.914179	0.276383	0.782254	0.98269	3.39184	0.953401	3.55762	0.000374234	0.00452776	KNL1
ENSG00000175764	-1.3753	0.351535	-3.91229	9.14259e-05	0.0038775	0.368384	0.452034	0.814946	0.415103	0.904218	-0.962925	0.386666	-2.49033	0.0127625	0.0619042	TTLL11
ENSG00000196167	-2.45576	0.627852	-3.91137	9.17723e-05	0.00388369	-0.290926	0.513521	-0.566533	0.571032	0.94808	-2.70236	0.634779	-4.25716	2.07039e-05	0.000472849	COLCA1
ENSG00000175895	1.26169	0.322702	3.90978	9.23812e-05	0.00390094	-0.772356	0.451138	-1.71202	0.0868932	0.652463	0.539981	0.386547	1.39693	0.162433	0.363039	PLEKHF2
ENSG00000101665	-1.28155	0.32802	-3.90694	9.34727e-05	0.00393845	0.147964	0.331945	0.445747	0.65578	0.965955	-1.08666	0.346379	-3.1372	0.00170569	0.0139223	SMAD7
ENSG00000180340	1.54984	0.396983	3.90404	9.46008e-05	0.00397734	0.201949	0.575314	0.351025	0.72557	0.974158	1.79632	0.479929	3.74289	0.000181916	0.00263448	FZD2
ENSG00000231999	-1.81526	0.465287	-3.90139	9.56426e-05	0.00399861	0.772049	0.372672	2.07166	0.0382973	0.518769	-1.00025	0.522895	-1.9129	0.0557607	0.176331	LRRC8C-DT
ENSG00000205592	-5.31322	1.36178	-3.90168	9.55286e-05	0.00399861	1.18222	1.33379	0.886364	0.375421	0.891998	-4.07795	1.62068	-2.51619	0.0118632	0.0582864	MUC19
ENSG00000166741	2.89197	0.741308	3.90118	9.57256e-05	0.00399861	3.29363	0.838009	3.9303	8.48399e-05	0.0180619	6.21301	0.767108	8.09927	5.52898e-16	3.64455e-13	NNMT
ENSG00000198597	-3.42941	0.879788	-3.89799	9.69935e-05	0.00404285	0.698466	0.7876	0.886827	0.375172	0.891998	-2.68654	0.778067	-3.45284	0.000554723	0.00606641	ZNF536
ENSG00000132321	-3.84445	0.986553	-3.89685	9.74502e-05	0.00405317	0.484913	0.804638	0.602648	0.546743	0.943665	-3.33059	1.23754	-2.69131	0.00711725	0.0400275	IQCA1
ENSG00000255408	-4.90094	1.25788	-3.89618	9.77234e-05	0.00405583	1.88141	0.789891	2.38186	0.0172254	0.376534	-2.99788	1.41935	-2.11216	0.0346731	0.126951	PCDHA3
ENSG00000276180	2.74225	0.704349	3.89331	9.88841e-05	0.00407653	-0.491302	0.722831	-0.679692	0.496699	0.931575	2.28984	0.778484	2.94141	0.00326719	0.0227525	HIST1H4I
ENSG00000163083	1.76286	0.452843	3.89287	9.90633e-05	0.00407653	-0.565488	0.48819	-1.15834	0.246727	0.832144	1.24346	0.553261	2.24751	0.0246072	0.099892	INHBB
ENSG00000122861	2.66993	0.68569	3.89378	9.86937e-05	0.00407653	1.96282	0.800535	2.45189	0.0142108	0.344296	4.67093	0.628997	7.426	1.11929e-13	4.65137e-11	PLAU
ENSG00000188783	-2.29002	0.588234	-3.89305	9.89924e-05	0.00407653	0.530345	0.422629	1.25487	0.209526	0.797823	-1.70868	0.629092	-2.71611	0.00660544	0.0377939	PRELP
ENSG00000204065	-2.51173	0.645451	-3.89143	9.96537e-05	0.00409214	-0.387433	0.668666	-0.579413	0.562311	0.946089	-2.84729	0.683086	-4.16828	3.06908e-05	0.000648495	TCEAL5
ENSG00000198826	2.68443	0.690356	3.88847	0.000100878	0.00411509	0.609074	0.629105	0.96816	0.332965	0.874454	3.34144	0.853706	3.91404	9.07637e-05	0.00153679	ARHGAP11A
ENSG00000215769	-1.66345	0.427896	-3.88752	0.000101274	0.00411509	1.25384	0.629144	1.99294	0.0462684	0.55236	-0.375446	0.593313	-0.632796	0.526867	0.731002	ARHGAP27P1-BPTFP1-KPNA2P3
ENSG00000143228	2.48883	0.640174	3.88774	0.000101183	0.00411509	0.73923	0.794246	0.930733	0.351992	0.883039	3.26771	0.611534	5.34347	9.11845e-08	6.2253e-06	NUF2
ENSG00000257950	-4.26467	1.09658	-3.88907	0.000100629	0.00411509	0.3419	1.1307	0.30238	0.762362	0.982196	-3.88559	1.36155	-2.85381	0.00431985	0.0278886	P2RX5-TAX1BP3
ENSG00000165300	-2.68839	0.69144	-3.88809	0.000101035	0.00411509	-0.527841	0.544954	-0.968597	0.332746	0.874454	-3.16431	0.694716	-4.55482	5.24307e-06	0.00015909	SLITRK5
ENSG00000259954	-3.40775	0.877786	-3.88222	0.000103509	0.00419711	2.50303	0.959261	2.60933	0.00907198	0.274657	-0.882266	1.0722	-0.822859	0.410588	NaN	IL21R-AS1
ENSG00000235049	-4.30031	1.10803	-3.88104	0.00010401	0.0042086	1.78615	0.830259	2.15131	0.0314515	0.49054	-2.46721	1.40825	-1.75197	0.0797796	NaN	LINC00940
ENSG00000135525	-2.70773	0.697882	-3.87993	0.000104487	0.00421911	0.294157	0.696889	0.4221	0.672952	0.966632	-2.36648	0.560931	-4.21885	2.45553e-05	0.00053707	MAP7
ENSG00000163873	1.9156	0.493862	3.87881	0.000104967	0.00422965	-0.233055	0.485882	-0.479652	0.631475	0.960968	1.71832	0.444221	3.86817	0.000109656	0.00177794	GRIK3
ENSG00000168481	-4.22024	1.08825	-3.87801	0.000105315	0.00423384	0.303873	0.900615	0.337407	0.73581	0.976834	-3.86616	0.99524	-3.88466	0.000102475	0.00169274	LGI3
ENSG00000233452	-3.39572	0.875736	-3.87756	0.000105507	0.00423384	-0.463394	0.866972	-0.534497	0.592998	0.952251	-3.81338	0.756078	-5.04364	4.56758e-07	2.40534e-05	STXBP5-AS1
ENSG00000128253	-6.42207	1.65669	-3.87644	0.000105997	0.0042447	-0.613449	1.22226	-0.501898	0.615739	0.956834	-6.79023	1.53409	-4.42623	9.58932e-06	0.000252841	RFPL2
ENSG00000197238	2.87246	0.74133	3.87474	0.000106737	0.00426551	-0.705988	0.709826	-0.994594	0.319934	0.867382	2.22519	0.65932	3.37498	0.000738222	0.0075143	HIST1H4J
ENSG00000123975	2.34756	0.605952	3.87417	0.000106987	0.0042667	-0.699073	0.884911	-0.789992	0.429532	0.911465	1.70071	0.619002	2.7475	0.00600509	0.0352235	CKS2
ENSG00000255872	6.84963	1.76826	3.87366	0.000107215	0.00426702	-5.09961	2.33265	-2.18619	0.0288016	NaN	1.76737	1.51881	1.16366	0.244564	0.471897	AL138752.2
ENSG00000254919	2.39404	0.618354	3.87164	0.000108107	0.00428078	1.10803	0.921026	1.20304	0.228961	0.82026	3.53147	0.730687	4.83308	1.34438e-06	5.61119e-05	AC090692.1
ENSG00000260528	-1.85872	0.480091	-3.87159	0.000108128	0.00428078	0.511877	0.806542	0.634657	0.525652	0.941295	-1.3166	0.803166	-1.63927	0.101157	0.265076	FAM157C
ENSG00000196507	-1.76159	0.455089	-3.87088	0.000108444	0.00428078	0.323612	0.520993	0.621145	0.534504	0.943157	-1.39076	0.428962	-3.24216	0.00118628	0.0106866	TCEAL3
ENSG00000104833	-3.23459	0.83552	-3.87135	0.000108236	0.00428078	0.128512	0.726575	0.176874	0.859608	0.989471	-3.05623	0.771084	-3.96355	7.38421e-05	0.00130459	TUBB4A
ENSG00000249550	-3.33315	0.86139	-3.8695	0.00010906	0.00429632	-0.452975	0.732401	-0.61848	0.536259	0.943157	-3.73402	0.841269	-4.43855	9.05658e-06	0.000242221	LINC01234
ENSG00000152931	-4.48804	1.16044	-3.86753	0.000109944	0.0043224	-0.140289	1.10957	-0.126435	0.899387	0.991758	-4.57424	0.997122	-4.58744	4.4872e-06	0.000140849	PART1
ENSG00000184588	1.43379	0.37094	3.86528	0.000110962	0.00435359	-0.322773	0.492943	-0.654787	0.512605	0.937754	1.16278	0.390773	2.9756	0.0029242	0.0209753	PDE4B
ENSG00000277287	-3.76938	0.975564	-3.86379	0.00011164	0.00437133	0.505017	0.761816	0.662911	0.507387	0.935493	-3.22406	1.05331	-3.06088	0.00220687	NaN	AL109976.1
ENSG00000178722	-2.29498	0.594407	-3.86095	0.000112945	0.00440464	0.464538	0.646776	0.718237	0.472611	0.92574	-1.79575	0.591664	-3.03509	0.00240464	0.0180617	C5orf64
ENSG00000122779	1.53731	0.398152	3.8611	0.000112876	0.00440464	0.0165828	0.41842	0.0396319	0.968387	0.997155	1.59581	0.414593	3.8491	0.000118554	0.0018933	TRIM24
ENSG00000168994	1.33809	0.346696	3.85954	0.000113602	0.00442134	-0.711905	0.547136	-1.30115	0.193207	0.783283	0.678107	0.55969	1.21158	0.225675	0.447833	PXDC1
ENSG00000143171	-4.19655	1.08759	-3.85858	0.000114046	0.00442975	-0.409334	0.845292	-0.484251	0.628208	0.960017	-4.56039	0.761984	-5.9849	2.16527e-09	2.61971e-07	RXRG
ENSG00000203877	-3.15226	0.817091	-3.85791	0.000114359	0.00443302	-0.492053	0.707247	-0.695729	0.486599	0.929149	-3.63827	0.716629	-5.07692	3.83605e-07	2.11936e-05	RIPPLY2
ENSG00000106278	1.59789	0.414289	3.85695	0.000114812	0.00444169	-0.22887	0.553977	-0.41314	0.679504	0.967491	1.40973	0.505951	2.78631	0.0053312	0.0323425	PTPRZ1
ENSG00000229847	-4.06555	1.05476	-3.85447	0.000115981	0.00446119	0.495233	0.912459	0.542746	0.587305	0.950592	-3.52778	1.03846	-3.39712	0.000680993	0.00711359	EMX2OS
ENSG00000076344	-1.99658	0.517985	-3.85451	0.00011596	0.00446119	0.295376	0.568803	0.519294	0.603556	0.955795	-1.66281	0.371702	-4.47349	7.69522e-06	0.000213811	RGS11
ENSG00000276043	2.10192	0.545329	3.85442	0.000116007	0.00446119	-0.336483	0.688956	-0.488395	0.62527	0.959945	1.81427	0.770298	2.35529	0.0185084	0.0817295	UHRF1
ENSG00000270882	2.01578	0.523118	3.85339	0.000116492	0.00447098	-0.39907	0.638795	-0.624724	0.532152	0.943157	1.66151	0.709041	2.34332	0.0191132	0.0836466	HIST2H4A
ENSG00000259660	-3.7545	0.97537	-3.84931	0.000118451	0.00452866	3.32466	0.855001	3.88849	0.000100871	0.01986	-0.403959	0.966821	-0.417822	0.676077	0.829571	DNM1P47
ENSG00000130822	-2.93279	0.761905	-3.84929	0.000118462	0.00452866	0.0941582	0.781422	0.120496	0.90409	0.991758	-2.7935	0.797693	-3.50197	0.000461831	0.00526752	PNCK
ENSG00000263677	-3.49046	0.906943	-3.8486	0.000118794	0.00453241	0.0952226	0.769169	0.123799	0.901474	0.991758	-3.34999	0.98305	-3.40775	0.000655009	0.00691013	AC012588.1
ENSG00000167513	2.49219	0.647808	3.84711	0.00011952	0.00455117	-0.729958	0.779581	-0.936347	0.349095	0.881525	1.80435	0.849368	2.12435	0.0336412	0.124316	CDT1
ENSG00000204959	-3.81481	0.991985	-3.84563	0.000120241	0.0045567	3.32549	0.910428	3.65267	0.00025953	0.0358806	-0.414003	1.84402	-0.224512	0.822359	NaN	ARHGEF34P
ENSG00000148660	-2.21315	0.575535	-3.84537	0.000120371	0.0045567	-0.589373	0.571494	-1.03128	0.302408	0.859279	-2.74464	0.445871	-6.1557	7.4749e-10	1.0134e-07	CAMK2G
ENSG00000131398	-2.56833	0.667873	-3.84553	0.000120292	0.0045567	0.163638	0.656669	0.249194	0.803211	0.984287	-2.36152	0.686243	-3.44123	0.000579082	0.00626825	KCNC3
ENSG00000178409	1.50411	0.391256	3.84431	0.000120892	0.00456199	-0.648376	0.416156	-1.55801	0.11923	0.699052	0.9035	0.450066	2.00749	0.044698	0.151461	BEND3
ENSG00000115468	-2.55615	0.664949	-3.84413	0.000120981	0.00456199	-0.644515	0.547668	-1.17684	0.239261	0.827034	-3.14812	0.773011	-4.07254	4.65027e-05	0.000902482	EFHD1
ENSG00000136928	-3.28126	0.853786	-3.84319	0.000121445	0.00457058	-0.72961	0.793372	-0.919632	0.357765	0.883355	-3.96018	0.729711	-5.42705	5.72915e-08	4.1642e-06	GABBR2
ENSG00000115163	2.58736	0.673688	3.84059	0.000122738	0.00459643	0.732485	0.952995	0.768614	0.442122	NaN	3.35592	0.710116	4.72588	2.29125e-06	8.423e-05	CENPA
ENSG00000173253	-4.16249	1.08387	-3.84038	0.000122843	0.00459643	1.84841	0.790776	2.33746	0.0194151	0.395656	-2.21094	1.43659	-1.53902	0.1238	NaN	DMRT2
ENSG00000187775	-4.23905	1.10367	-3.84087	0.000122597	0.00459643	0.270408	1.02028	0.265032	0.790985	0.983319	-3.93962	0.954545	-4.12723	3.6716e-05	0.000748255	DNAH17
ENSG00000155189	1.42806	0.372533	3.83338	0.000126394	0.00472018	-0.732477	0.428744	-1.70843	0.0875572	0.654177	0.742837	0.474251	1.56634	0.11727	0.293036	AGPAT5
ENSG00000185823	-6.19938	1.6184	-3.83057	0.000127846	0.00476522	0.543957	1.38835	0.3918	0.695206	0.970341	-5.6325	1.87691	-3.00094	0.00269144	NaN	NPAP1
ENSG00000178568	-2.55353	0.666823	-3.82939	0.00012846	0.00477892	3.43079e-05	0.565774	6.06389e-05	0.999952	0.999989	-2.50858	0.805826	-3.11306	0.00185161	0.0148346	ERBB4
ENSG00000134215	1.91128	0.49975	3.82447	0.000131054	0.00486607	1.38187	0.621902	2.222	0.0262832	0.451804	3.34078	0.59744	5.59182	2.24707e-08	1.94366e-06	VAV3
ENSG00000271714	-2.03293	0.531644	-3.82385	0.000131386	0.00486908	-0.841371	0.49275	-1.7075	0.087729	0.654177	-2.82506	0.536244	-5.26824	1.37742e-07	8.86555e-06	AC010501.2
ENSG00000285331	-1.52744	0.399664	-3.82181	0.000132475	0.00489259	-0.0393744	0.471831	-0.0834501	0.933494	0.993739	-1.52665	0.449068	-3.39959	0.000674858	0.00707269	AC090517.5
ENSG00000155052	-3.4454	0.901531	-3.82172	0.000132526	0.00489259	-0.408694	0.90073	-0.453737	0.650018	0.964326	-3.80267	0.699114	-5.43927	5.34984e-08	3.94856e-06	CNTNAP5
ENSG00000088538	-2.44162	0.6394	-3.81861	0.000134205	0.00494516	-0.253048	0.608402	-0.415923	0.677466	0.967429	-2.64692	0.660038	-4.01025	6.06535e-05	0.00112024	DOCK3
ENSG00000250159	-2.85642	0.748276	-3.81734	0.000134899	0.00495963	0.656804	0.700321	0.937861	0.348316	0.881525	-2.16812	0.999446	-2.16932	0.0300586	0.115081	AC106791.1
ENSG00000169679	2.47184	0.647674	3.81649	0.000135365	0.00495963	1.30587	0.647562	2.01659	0.043738	0.542726	3.81855	0.682802	5.59247	2.23868e-08	1.94366e-06	BUB1
ENSG00000142156	1.91349	0.501321	3.8169	0.000135137	0.00495963	0.186556	0.405655	0.459887	0.645597	0.964326	2.14258	0.532712	4.02203	5.76988e-05	0.00107712	COL6A1
ENSG00000065308	1.80783	0.473766	3.81587	0.000135705	0.00496269	0.446644	0.52287	0.854217	0.392985	0.898741	2.29804	0.436353	5.26646	1.39082e-07	8.92181e-06	TRAM2
ENSG00000161896	-3.54586	0.929562	-3.81455	0.000136432	0.00497991	1.43836	0.808684	1.77865	0.0752979	0.633943	-2.07111	1.06425	-1.94607	0.0516461	0.167305	IP6K3
ENSG00000204655	-5.03902	1.32181	-3.81223	0.000137721	0.0050173	0.88565	1.05656	0.838241	0.401895	0.901978	-4.10596	1.15538	-3.55376	0.000379767	0.00457352	MOG
ENSG00000176658	-2.41769	0.634269	-3.81177	0.000137974	0.0050173	0.306271	0.601715	0.508997	0.610755	0.956567	-2.07007	0.596294	-3.47156	0.00051744	0.0057403	MYO1D
ENSG00000140470	-2.70226	0.709899	-3.80654	0.000140926	0.005077	0.0108094	0.612907	0.0176363	0.985929	0.999468	-2.64871	0.686566	-3.85792	0.000114358	0.00184095	ADAMTS17
ENSG00000167536	1.48516	0.390032	3.80778	0.000140219	0.005077	0.0416647	0.438117	0.0950996	0.924236	0.993516	1.57182	0.454352	3.45947	0.000541232	0.00596322	DHRS13
ENSG00000134201	-2.2642	0.59478	-3.80678	0.000140787	0.005077	1.2925	0.757536	1.70618	0.0879739	0.654177	-0.933187	0.841485	-1.10898	0.267441	0.49717	GSTM5
ENSG00000249307	-5.1026	1.33994	-3.80809	0.000140043	0.005077	-0.275087	1.04297	-0.263753	0.791971	0.983322	-5.33416	1.82403	-2.92439	0.00345136	0.0236069	LINC01088
ENSG00000088930	1.06468	0.279683	3.80674	0.000140813	0.005077	-0.190181	0.354094	-0.537093	0.591204	0.95188	0.922138	0.317211	2.90702	0.00364892	0.0245091	XRN2
ENSG00000134871	1.76092	0.463245	3.80128	0.000143953	0.00515728	1.78216	0.556733	3.2011	0.00136906	0.0978487	3.57306	0.365416	9.77806	1.39864e-22	5.34726e-19	COL4A2
ENSG00000138669	-4.80961	1.26501	-3.80204	0.000143512	0.00515728	-0.640326	0.935896	-0.684184	0.493859	0.930954	-5.44103	1.07479	-5.06242	4.13975e-07	2.2418e-05	PRKG2
ENSG00000176890	2.18902	0.575803	3.80168	0.00014372	0.00515728	0.512474	0.644124	0.795614	0.426256	0.909939	2.74558	0.666814	4.11745	3.83083e-05	0.000773286	TYMS
ENSG00000157445	-3.88155	1.02187	-3.79847	0.00014559	0.00518232	-0.0850159	0.779373	-0.109082	0.913137	0.992295	-3.9177	0.957738	-4.09058	4.303e-05	0.000849273	CACNA2D3
ENSG00000144278	-3.45889	0.910762	-3.7978	0.000145988	0.00518232	-1.79427	0.547818	-3.2753	0.00105549	0.0847119	-5.20862	1.04004	-5.0081	5.49695e-07	2.77255e-05	GALNT13
ENSG00000101367	0.941218	0.247817	3.79804	0.000145842	0.00518232	-0.710742	0.456589	-1.55663	0.119558	0.699052	0.283723	0.417357	0.679809	0.496626	0.708576	MAPRE1
ENSG00000188039	-2.59655	0.683623	-3.79821	0.000145742	0.00518232	-0.109224	0.520384	-0.20989	0.833753	0.985687	-2.65475	0.721382	-3.68009	0.000233152	0.00318126	NWD1
ENSG00000171940	1.72084	0.453075	3.79813	0.000145792	0.00518232	0.797017	0.502511	1.58607	0.112724	0.687858	2.55652	0.404023	6.32765	2.48921e-10	4.06699e-08	ZNF217
ENSG00000232528	-2.40381	0.633254	-3.79596	0.000147071	0.00519982	-0.213575	0.598838	-0.356649	0.721354	0.973495	-2.57338	0.752403	-3.42022	0.000625711	0.00666356	AL109809.1
ENSG00000230303	-2.77912	0.73225	-3.79532	0.000147456	0.00519982	-0.0181463	0.606591	-0.0299152	0.976135	0.997418	-2.75008	0.893814	-3.07679	0.0020924	0.0162199	AL353743.2
ENSG00000072163	-2.01539	0.531043	-3.79515	0.000147554	0.00519982	-0.330039	0.491463	-0.671544	0.501874	0.933248	-2.29908	0.499409	-4.6036	4.15245e-06	0.000131858	LIMS2
ENSG00000101057	2.7089	0.713703	3.79556	0.000147313	0.00519982	1.4138	0.968477	1.45982	0.14434	0.73697	4.16537	0.962017	4.32983	1.49226e-05	0.000358819	MYBL2
ENSG00000215559	-5.98541	1.5774	-3.79449	0.000147948	0.00520423	0.984513	1.24287	0.792127	0.428287	0.910365	-4.85224	1.67463	-2.89749	0.00376161	NaN	ANKRD20A11P
ENSG00000125991	1.07462	0.283262	3.79373	0.000148401	0.00520465	0.193828	0.334205	0.579967	0.561937	0.946089	1.31523	0.323032	4.07153	4.67063e-05	0.000904024	ERGIC3
ENSG00000262619	-3.32538	0.876584	-3.79357	0.000148497	0.00520465	-0.490159	0.733622	-0.668136	0.504047	0.933667	-3.78044	0.85587	-4.41708	1.00044e-05	0.000261621	LINC00621
ENSG00000281708	-3.0524	0.805067	-3.79148	0.00014975	0.00523908	-0.354801	0.85859	-0.413238	0.679433	0.967491	-3.36051	0.995411	-3.376	0.000735478	0.00749434	ERC2-IT1
ENSG00000205560	-2.06386	0.544553	-3.79	0.000150645	0.00526091	1.33605	0.522831	2.55541	0.0106063	0.298108	-0.687505	0.625842	-1.09853	0.271974	0.501984	CPT1B
ENSG00000168497	-2.42531	0.640261	-3.788	0.000151867	0.00528589	-0.209431	0.778307	-0.269086	0.787864	0.983129	-2.58954	0.712868	-3.63256	0.000280621	0.00365419	CAVIN2
ENSG00000179930	-3.63864	0.960586	-3.78793	0.000151906	0.00528589	2.4128	0.969998	2.48743	0.012867	0.329277	-1.19891	0.918883	-1.30474	0.19198	0.403772	ZNF648
ENSG00000160678	-3.82853	1.01161	-3.78458	0.000153966	0.00534798	1.00469	0.969671	1.03611	0.30015	0.857802	-2.77979	0.788371	-3.526	0.000421889	0.00492784	S100A1
ENSG00000165084	-3.17368	0.839555	-3.7802	0.000156704	0.00542661	1.60877	0.871992	1.84494	0.0650461	0.608769	-1.54288	0.828474	-1.86231	0.0625591	0.191494	C8orf34
ENSG00000179178	-4.99794	1.32219	-3.78006	0.00015679	0.00542661	0.751033	1.11697	0.672385	0.501339	0.933096	-4.23983	0.977247	-4.33855	1.43426e-05	0.000347056	TMEM125
ENSG00000117519	1.4791	0.391389	3.7791	0.000157398	0.00543678	0.320311	0.455608	0.703041	0.48203	0.92808	1.8406	0.391732	4.69862	2.61931e-06	9.30683e-05	CNN3
ENSG00000213376	-3.07582	0.814234	-3.77756	0.000158372	0.00543678	2.73201	0.889473	3.0715	0.00212988	0.125362	-0.316204	1.04144	-0.303623	0.761415	NaN	GAPDHP71
ENSG00000279685	-1.8809	0.497939	-3.77738	0.000158486	0.00543678	0.0189169	0.588685	0.0321342	0.974365	0.997418	-1.81685	0.667964	-2.71998	0.00652857	0.0375564	MAPT-IT1
ENSG00000168411	1.43371	0.379464	3.77826	0.00015793	0.00543678	-0.100721	0.494727	-0.20359	0.838674	0.986361	1.37394	0.380964	3.60649	0.000310363	0.00395001	RFWD3
ENSG00000172671	-2.39007	0.63272	-3.77746	0.000158437	0.00543678	0.523985	0.646399	0.810622	0.417583	0.904994	-1.83158	0.563419	-3.25084	0.00115066	0.0104544	ZFAND4
ENSG00000153982	-1.24711	0.33032	-3.77548	0.000159703	0.00546883	-0.261998	0.34754	-0.753863	0.450932	0.917872	-1.46389	0.357279	-4.09732	4.1796e-05	0.00082967	GDPD1
ENSG00000141934	-3.12811	0.828649	-3.77495	0.000160037	0.00547061	0.675556	0.831175	0.812772	0.416349	0.904273	-2.40499	0.545507	-4.40872	1.03982e-05	0.000270374	PLPP2
ENSG00000149972	-5.07447	1.34503	-3.77276	0.000161453	0.0055093	0.349844	1.80988	0.193297	0.846726	0.987761	-4.68387	1.06254	-4.40819	1.0424e-05	0.000270374	CNTN5
ENSG00000105784	-3.48979	0.925301	-3.77151	0.000162259	0.00552709	0.012221	0.915518	0.0133487	0.98935	0.999574	-3.43041	0.808303	-4.24396	2.19607e-05	0.000494465	RUNDC3B
ENSG00000100307	-2.20489	0.584794	-3.77038	0.000163	0.00554258	0.0223716	0.649151	0.0344629	0.972508	0.997418	-2.13049	0.435763	-4.8891	1.013e-06	4.45161e-05	CBX7
ENSG00000184305	-4.07669	1.08161	-3.76908	0.000163849	0.00556167	0.0423694	1.06994	0.0395997	0.968412	0.997155	-3.989	0.860462	-4.63589	3.55413e-06	0.000116537	CCSER1
ENSG00000184481	-1.92676	0.511288	-3.76845	0.000164267	0.00556614	-0.324326	0.667484	-0.485893	0.627043	0.959945	-2.19252	0.628431	-3.48888	0.000485046	0.00547029	FOXO4
ENSG00000266714	-1.61409	0.428449	-3.76729	0.000165032	0.00557455	1.26109	0.612264	2.05972	0.0394251	0.521586	-0.322928	0.534531	-0.604133	0.545755	0.744658	MYO15B
ENSG00000101346	1.73164	0.459663	3.7672	0.000165091	0.00557455	-0.204666	0.510833	-0.400652	0.688677	0.968594	1.56788	0.446716	3.50979	0.000448463	0.00514575	POFUT1
ENSG00000198932	-2.06233	0.547519	-3.76668	0.000165435	0.00557645	0.425062	0.791727	0.536879	0.591351	0.95188	-1.59512	0.697746	-2.2861	0.0222485	0.0934115	GPRASP1
ENSG00000224184	3.4491	0.916142	3.76481	0.000166675	0.0056085	-0.000717924	1.02602	-0.000699718	0.999442	NaN	3.48365	0.981739	3.54844	0.000387513	0.00463271	MIR3681HG
ENSG00000136122	1.98911	0.529015	3.76002	0.000169899	0.00564427	-0.37065	0.707165	-0.524136	0.600184	0.955559	1.67067	0.509241	3.2807	0.00103549	0.00965769	BORA
ENSG00000006377	-4.95139	1.31616	-3.762	0.000168563	0.00564427	1.15617	1.18891	0.972464	0.33082	0.873169	-3.79918	1.03185	-3.68193	0.000231476	0.00316065	DLX6
ENSG00000124313	-2.04639	0.544137	-3.7608	0.000169372	0.00564427	-0.245709	0.528075	-0.465292	0.641722	0.963502	-2.24751	0.604379	-3.71871	0.000200244	0.00282415	IQSEC2
ENSG00000171517	-6.94323	1.84628	-3.76067	0.000169462	0.00564427	2.08114	2.74489	0.758185	0.44834	0.916837	-5.34695	3.03843	-1.75977	0.078446	NaN	LPAR3
ENSG00000105695	-4.58788	1.2202	-3.75993	0.000169963	0.00564427	0.488925	1.06574	0.458766	0.646402	0.964326	-4.0547	1.07342	-3.77735	0.000158504	0.0023858	MAG
ENSG00000227906	-2.51677	0.669028	-3.76183	0.000168672	0.00564427	-0.573214	0.702662	-0.815774	0.414629	0.904218	-3.05016	0.577069	-5.2856	1.25293e-07	8.23059e-06	SNAP25-AS1
ENSG00000204071	-3.93411	1.04637	-3.75977	0.000170068	0.00564427	-0.0128097	0.981935	-0.0130453	0.989592	0.999574	-3.90176	1.07164	-3.64094	0.000271647	0.0035616	TCEAL6
ENSG00000214652	-3.80049	1.01058	-3.76069	0.000169448	0.00564427	-1.71504	0.596113	-2.87703	0.00401434	0.177426	-5.45994	1.03567	-5.2719	1.35018e-07	8.78367e-06	ZNF727
ENSG00000120341	-2.55767	0.680443	-3.75883	0.000170707	0.0056558	1.38086	0.635218	2.17384	0.0297174	0.479213	-1.13198	0.899891	-1.25791	0.208423	0.425665	SEC16B
ENSG00000282936	-1.23018	0.327362	-3.75787	0.000171369	0.00565838	0.497718	0.649386	0.766444	0.443412	0.91661	-0.697589	0.665352	-1.04845	0.294431	0.526294	AC004706.3
ENSG00000163644	-1.56554	0.416561	-3.75825	0.000171107	0.00565838	-0.365445	0.480283	-0.760894	0.44672	0.916837	-1.87682	0.328631	-5.71103	1.12292e-08	1.07868e-06	PPM1K
ENSG00000184613	-3.15821	0.840728	-3.75652	0.000172293	0.00567921	0.0056539	0.895396	0.00631442	0.994962	0.999574	-3.10324	0.71245	-4.35573	1.32621e-05	0.000327967	NELL2
ENSG00000172995	-2.75369	0.733428	-3.75455	0.000173656	0.00571442	-0.618431	0.737234	-0.838853	0.401552	0.901978	-3.32301	0.698698	-4.75601	1.97461e-06	7.57964e-05	ARPP21
ENSG00000101746	-1.60083	0.426725	-3.75143	0.000175832	0.00577622	0.178973	0.500753	0.357408	0.720787	0.973495	-1.38399	0.435527	-3.17774	0.00148427	0.0125996	NOL4
ENSG00000176624	1.30421	0.34788	3.74902	0.000177527	0.00582204	-0.538441	0.479981	-1.1218	0.261949	0.841922	0.810834	0.40897	1.98262	0.0474097	0.157847	MEX3C
ENSG00000148541	-2.17985	0.58164	-3.74776	0.000178419	0.00582336	-0.760867	0.49102	-1.54957	0.121246	0.701005	-2.88443	0.630021	-4.5783	4.68762e-06	0.000144998	FAM13C
ENSG00000107957	-2.41846	0.645319	-3.74769	0.000178468	0.00582336	0.325642	0.577874	0.563517	0.573083	0.94808	-2.05079	0.640067	-3.20402	0.00135521	0.0118131	SH3PXD2A
ENSG00000108106	2.02817	0.541133	3.748	0.000178247	0.00582336	0.110489	0.459273	0.240573	0.809886	0.984422	2.18179	0.586146	3.72226	0.000197445	0.00280205	UBE2S
ENSG00000142627	2.6051	0.695223	3.74714	0.000178859	0.0058263	-0.224184	0.66891	-0.335148	0.737513	0.976909	2.43709	0.774255	3.14765	0.00164586	0.0135614	EPHA2
ENSG00000077312	1.26954	0.339021	3.74473	0.000180591	0.00587283	-0.137267	0.42838	-0.320433	0.74864	0.97856	1.17754	0.384785	3.06024	0.00221157	0.0169377	SNRPA
ENSG00000235314	-2.43071	0.649656	-3.74153	0.000182903	0.00593807	0.184041	0.741122	0.248327	0.803881	0.984287	-2.20297	0.683066	-3.22512	0.00125921	0.0111854	LINC00957
ENSG00000169607	2.93935	0.785986	3.7397	0.000184243	0.00595167	1.18499	0.854039	1.38751	0.165285	0.759269	4.16031	0.788679	5.27504	1.3273e-07	8.68929e-06	CKAP2L
ENSG00000258429	1.49839	0.400648	3.73992	0.000184078	0.00595167	-1.38882	0.446631	-3.10955	0.00187371	0.115138	0.161808	0.438263	0.369203	0.711977	0.85327	PDF
ENSG00000206633	3.07267	0.821562	3.74003	0.000183995	0.00595167	-1.66028	1.21935	-1.36161	0.173321	NaN	1.45577	0.837607	1.73801	0.0822082	0.230422	SNORA80B
ENSG00000130988	-2.51995	0.674064	-3.73845	0.00018516	0.00597135	1.76334	0.610979	2.88609	0.00390061	0.174928	-0.724671	0.891178	-0.813161	0.416126	0.643517	RGN
ENSG00000280604	-3.55563	0.951478	-3.73695	0.000186266	0.00598706	-0.179051	0.79111	-0.226328	0.820946	0.984454	-3.6911	0.997107	-3.70181	0.000214071	0.00298046	AJ239328.1
ENSG00000069998	1.11005	0.297027	3.7372	0.000186081	0.00598706	-0.711216	0.462114	-1.53905	0.123792	0.702589	0.448164	0.426884	1.04985	0.293787	0.525447	HDHD5
ENSG00000284977	-2.47163	0.662007	-3.73354	0.000188805	0.00603866	-0.451639	0.519593	-0.869217	0.384729	0.89638	-2.87971	0.665879	-4.32467	1.52759e-05	0.000366619	AL160272.1
ENSG00000153558	-2.03856	0.545987	-3.73372	0.000188671	0.00603866	-0.117853	0.530927	-0.221976	0.824332	0.984811	-2.12064	0.686038	-3.09114	0.00199386	0.0157174	FBXL2
ENSG00000273703	3.32407	0.89013	3.73437	0.000188187	0.00603866	-0.580215	1.10616	-0.524529	0.599911	NaN	2.78068	0.981508	2.83307	0.00461037	0.0292117	HIST1H2BM
ENSG00000131473	1.5363	0.411534	3.7331	0.000189136	0.00603927	-0.868638	0.520626	-1.66845	0.0952264	0.666663	0.713974	0.555616	1.28501	0.198788	0.413191	ACLY
ENSG00000153933	-3.28099	0.880054	-3.72818	0.000192871	0.00612823	-0.144414	1.01352	-0.142487	0.886696	0.990789	-3.37363	0.824592	-4.09127	4.29014e-05	0.00084809	DGKE
ENSG00000180573	1.44047	0.386314	3.72876	0.000192426	0.00612823	-0.671198	0.581797	-1.15366	0.248638	0.833572	0.815117	0.528878	1.54122	0.123263	0.302756	HIST1H2AC
ENSG00000164620	-1.49264	0.400332	-3.72852	0.00019261	0.00612823	-0.0706474	0.52429	-0.134749	0.892811	0.990938	-1.52272	0.536182	-2.83993	0.00451228	0.0288098	RELL2
ENSG00000137673	4.81474	1.29201	3.72656	0.000194114	0.00613754	-0.363318	1.79772	-0.202099	0.839839	NaN	4.48157	1.15111	3.89325	9.89118e-05	0.00165135	MMP7
ENSG00000051180	2.60049	0.697769	3.72686	0.00019388	0.00613754	-0.500179	1.08802	-0.459714	0.645721	NaN	2.19576	0.678546	3.23597	0.0012123	0.0108641	RAD51
ENSG00000145832	-2.73513	0.733923	-3.72673	0.000193981	0.00613754	-1.8485	0.748113	-2.47088	0.0134782	0.338095	-4.52814	0.603689	-7.50078	6.34398e-14	2.95784e-11	SLC25A48
ENSG00000117650	2.46124	0.66058	3.72588	0.000194636	0.00614403	0.301186	0.841945	0.357727	0.720548	NaN	2.80096	0.763737	3.66743	0.000244997	0.00330513	NEK2
ENSG00000189419	-3.03663	0.815217	-3.72493	0.000195368	0.0061571	0.15558	0.709544	0.219268	0.826441	0.985059	-2.83469	0.905403	-3.13087	0.00174292	0.0141777	SPATA41
ENSG00000099822	-2.57502	0.691578	-3.72339	0.000196562	0.00618467	-0.329541	0.691845	-0.476322	0.633845	0.961569	-2.85337	0.522174	-5.4644	4.64476e-08	3.55157e-06	HCN2
ENSG00000287067	-3.11498	0.836694	-3.72297	0.000196897	0.00618517	0.63976	0.688856	0.928727	0.35303	0.883039	-2.43354	1.086	-2.24084	0.0250367	0.100971	AC106791.3
ENSG00000157554	-1.78043	0.478334	-3.72214	0.000197542	0.00619539	-0.514743	0.594867	-0.865308	0.38687	0.896776	-2.23878	0.604408	-3.70409	0.000212152	0.00296021	ERG
ENSG00000109084	1.16585	0.313333	3.7208	0.00019859	0.00621822	-1.66321	0.570607	-2.91481	0.00355906	0.165253	-0.445157	0.537405	-0.828345	0.407475	0.636689	TMEM97
ENSG00000078295	-2.57956	0.693491	-3.71967	0.000199486	0.00622615	-1.26204	0.553049	-2.28197	0.0224912	0.419806	-3.78291	0.71199	-5.31315	1.07746e-07	7.17654e-06	ADCY2
ENSG00000197977	2.86118	0.769191	3.71972	0.000199443	0.00622615	-0.894803	0.846296	-1.05732	0.290367	0.853948	2.03522	0.336631	6.04584	1.48629e-09	1.94603e-07	ELOVL2
ENSG00000237517	-2.42955	0.653556	-3.71743	0.000201262	0.00627148	-0.806743	0.777233	-1.03797	0.299285	0.857696	-3.18665	0.642095	-4.96289	6.94527e-07	3.35267e-05	DGCR5
ENSG00000146151	-4.18073	1.12492	-3.71646	0.000202031	0.00628535	-0.451412	0.715672	-0.630753	0.528202	0.942077	-4.58183	1.08054	-4.24032	2.23199e-05	0.000500118	HMGCLL1
ENSG00000131043	1.13405	0.305218	3.71555	0.00020276	0.00629382	-0.617243	0.489448	-1.2611	0.207273	0.796279	0.564367	0.459307	1.22874	0.219171	0.439528	AAR2
ENSG00000180447	2.69173	0.724559	3.71498	0.000203217	0.00629382	-0.00798537	0.76999	-0.0103707	0.991725	0.999574	2.74151	0.726003	3.77617	0.000159257	0.00238773	GAS1
ENSG00000177426	1.58849	0.427599	3.71491	0.000203278	0.00629382	0.814332	0.661211	1.23158	0.218107	0.80803	2.44977	0.574819	4.26181	2.0278e-05	0.000465345	TGIF1
ENSG00000107937	-1.20333	0.323985	-3.71416	0.000203877	0.0063023	-0.0916926	0.346694	-0.264477	0.791412	0.983319	-1.25104	0.352795	-3.54608	0.000391003	0.00466276	GTPBP4
ENSG00000131153	2.04213	0.54994	3.71337	0.000204519	0.00631208	0.446866	0.584933	0.763961	0.44489	0.916837	2.52233	0.648279	3.8908	9.99127e-05	0.0016637	GINS2
ENSG00000256235	1.89066	0.509706	3.70931	0.000207824	0.00640389	0.909223	0.526432	1.72714	0.0841423	0.64434	2.8385	0.561985	5.05084	4.39874e-07	2.35536e-05	SMIM3
ENSG00000205710	-2.37517	0.640601	-3.70772	0.000209135	0.00641368	0.435474	0.698006	0.623884	0.532704	0.943157	-1.90513	0.842114	-2.26232	0.0236775	0.0973166	C17orf107
ENSG00000166923	-4.24253	1.14411	-3.70816	0.000208772	0.00641368	1.63314	1.00622	1.62305	0.104579	0.679761	-2.57502	1.01723	-2.5314	0.0113607	0.0564386	GREM1
ENSG00000162244	1.2535	0.338074	3.70777	0.000209092	0.00641368	-0.635584	0.44092	-1.4415	0.149444	0.74204	0.664542	0.339115	1.95964	0.0500382	0.16343	RPL29
ENSG00000144671	-3.53748	0.954572	-3.70582	0.000210704	0.00645161	0.365539	0.839824	0.435257	0.663376	0.966563	-3.10792	1.26684	-2.45329	0.0141556	NaN	SLC22A14
ENSG00000230417	-2.34378	0.632623	-3.70486	0.000211505	0.0064659	0.214618	0.404678	0.530344	0.595874	0.954134	-2.08709	0.705842	-2.95688	0.00310766	0.0218888	LINC00595
ENSG00000075223	-2.66694	0.719972	-3.70423	0.000212031	0.00647178	1.00633	0.719773	1.39813	0.162075	0.758728	-1.59642	0.567487	-2.81314	0.00490598	0.0305381	SEMA3C
ENSG00000204264	1.73772	0.4696	3.70042	0.00021524	0.00655941	-0.271046	0.573372	-0.472723	0.636411	0.962186	1.52291	0.655303	2.32398	0.0201268	0.0867711	PSMB8
ENSG00000236107	-2.89588	0.782906	-3.69889	0.000216541	0.00658871	0.567774	0.531988	1.06727	0.285851	0.853195	-2.25321	0.928764	-2.42603	0.0152649	NaN	SCN1A-AS1
ENSG00000280038	-2.00462	0.542062	-3.69814	0.000217189	0.00659804	0.259916	0.52347	0.496524	0.619524	0.957565	-1.6983	0.616958	-2.75269	0.00591076	0.0347928	DNM1P41
ENSG00000198835	-3.64111	0.984781	-3.69738	0.000217837	0.00660739	0.754763	0.911287	0.828239	0.407535	0.903228	-2.85187	0.844286	-3.37785	0.000730546	0.00745659	GJC2
ENSG00000143869	-3.84648	1.04099	-3.69502	0.00021987	0.00665861	0.243564	0.961906	0.25321	0.800106	0.984287	-3.56118	0.919631	-3.8724	0.000107768	0.00175926	GDF7
ENSG00000107864	-2.43983	0.66039	-3.69453	0.000220293	0.00666104	-0.423241	0.685546	-0.617378	0.536985	0.943157	-2.80722	0.504627	-5.56296	2.65231e-08	2.20442e-06	CPEB3
ENSG00000283674	-2.95001	0.79902	-3.69204	0.000222462	0.00669912	1.25097	0.772675	1.61901	0.105445	0.679761	-1.68267	0.834839	-2.01556	0.0438457	0.149191	AC068587.4
ENSG00000172824	-3.33699	0.903884	-3.69183	0.000222644	0.00669912	0.113979	1.08767	0.104791	0.916541	0.992525	-3.17976	0.960145	-3.31175	NaN	NaN	CES4A
ENSG00000236438	-1.97331	0.534555	-3.6915	0.000222935	0.00669912	0.353343	0.545948	0.647209	0.517496	0.939343	-1.58937	0.485521	-3.27353	0.00106213	0.00983707	FAM157A
ENSG00000105202	1.08444	0.293729	3.69197	0.000222526	0.00669912	-0.241217	0.389457	-0.619369	0.535674	0.943157	0.892427	0.333879	2.6729	0.00751976	0.0417573	FBL
ENSG00000110063	1.45465	0.394252	3.68965	0.000224567	0.00672431	-0.566026	0.426812	-1.32617	0.184783	0.776642	0.937184	0.448393	2.09009	0.0366093	0.13162	DCPS
ENSG00000276975	-1.88025	0.509586	-3.68975	0.000224471	0.00672431	1.00378	0.630724	1.59148	0.111503	0.686062	-0.852439	0.644757	-1.32211	0.186131	0.395763	HYDIN2
ENSG00000188211	-2.0118	0.545296	-3.68937	0.000224814	0.00672431	-0.850507	0.45551	-1.86715	0.0618803	0.598877	-2.81246	0.561083	-5.01255	5.37144e-07	2.72531e-05	NCR3LG1
ENSG00000152292	-2.65442	0.719557	-3.68897	0.000225166	0.00672446	1.1685	0.782227	1.49382	0.135224	0.722783	-1.42716	1.04986	-1.35937	0.174028	NaN	SH2D6
ENSG00000244306	-2.7785	0.753313	-3.68838	0.000225689	0.00672971	-0.0603131	0.924723	-0.0652229	0.947997	0.994869	-2.80293	0.927349	-3.02252	0.00250681	0.018617	DUXAP10
ENSG00000188738	-4.04922	1.09868	-3.68553	0.000228226	0.00679489	3.56336	1.13177	3.14848	0.0016412	0.105822	-0.457561	0.975182	-0.469205	0.638923	NaN	FSIP2
ENSG00000173210	-2.28238	0.619359	-3.68507	0.000228644	0.00679689	-1.08986	0.48707	-2.23758	0.0252482	0.443064	-3.31619	0.691169	-4.79794	1.60308e-06	6.39758e-05	ABLIM3
ENSG00000173918	2.38805	0.648308	3.68351	0.000230047	0.00682812	-0.915168	0.666195	-1.37372	0.169528	0.765119	1.52264	0.840737	1.81108	0.0701285	0.207091	C1QTNF1
ENSG00000280073	-3.26323	0.88614	-3.68252	0.000230941	0.00683374	0.863267	0.727068	1.18733	0.235099	0.823548	-2.33555	1.21116	-1.92835	0.0538115	NaN	AL157996.1
ENSG00000233098	-4.27521	1.16083	-3.68288	0.00023061	0.00683374	0.272359	1.04315	0.261092	0.794021	0.983494	-3.97757	1.28998	-3.08344	0.00204623	0.0160244	CCDC144NL-AS1
ENSG00000249958	-6.28202	1.70611	-3.68208	0.000231342	0.00683516	-0.247125	1.25199	-0.197385	0.843526	0.986985	-6.52669	1.43868	-4.53658	5.71733e-06	0.000170868	CCT7P2
ENSG00000273618	-2.06716	0.561565	-3.68108	0.000232252	0.00685162	-0.309606	0.708493	-0.436992	0.662117	0.966563	-2.3226	0.859771	-2.70142	0.00690437	0.039176	AL135999.2
ENSG00000285756	-3.19345	0.86839	-3.67744	0.00023559	0.00691593	-0.446805	0.802931	-0.556467	0.577892	0.949006	-3.57599	0.658054	-5.43419	5.50473e-08	4.04724e-06	BX890604.2
ENSG00000169105	1.55964	0.424217	3.67652	0.000236436	0.00691593	-0.288905	0.614717	-0.46998	0.638369	0.962186	1.31519	0.512926	2.56409	0.0103447	0.0528881	CHST14
ENSG00000122966	-2.12588	0.578172	-3.6769	0.000236082	0.00691593	-0.225345	0.50808	-0.443522	0.657388	0.966215	-2.30706	0.585894	-3.93768	8.22731e-05	0.00142682	CIT
ENSG00000277157	2.43757	0.663037	3.67637	0.000236573	0.00691593	-0.394891	0.745128	-0.529964	0.596137	0.954162	2.10556	0.630783	3.33801	0.000843821	0.00829408	HIST1H4D
ENSG00000196951	-3.0659	0.833712	-3.67741	0.000235612	0.00691593	0.100261	0.644979	0.155448	0.876468	0.990789	-2.9285	0.847623	-3.45496	0.000550376	0.00602922	SCOC-AS1
ENSG00000279255	-1.9899	0.541154	-3.67714	0.000235866	0.00691593	1.17172	0.607599	1.92845	0.0537997	0.572261	-0.783035	0.625773	-1.25131	0.210822	0.428565	Z97653.2
ENSG00000175832	2.68329	0.730263	3.67442	0.000238387	0.00695846	-2.70837	1.1575	-2.33984	NaN	NaN	0.0403456	1.13361	0.0355904	0.971609	0.987477	ETV4
ENSG00000182481	1.67795	0.4568	3.67328	0.000239456	0.00697916	-0.142666	0.420505	-0.339272	0.734405	0.976663	1.57837	0.488696	3.22975	0.00123898	0.0110313	KPNA2
ENSG00000164930	-2.42545	0.660441	-3.67248	0.000240212	0.00698897	1.00539	0.628277	1.60023	0.109548	0.685127	-1.37605	0.733158	-1.87689	0.0605336	0.186729	FZD6
ENSG00000004939	-6.00231	1.63455	-3.67215	0.000240514	0.00698897	3.13695	1.27717	2.45617	0.0140426	0.343499	-2.94038	2.09044	-1.40658	0.159551	NaN	SLC4A1
ENSG00000175548	1.06044	0.288882	3.67082	0.000241773	0.00701098	-1.12849	0.483621	-2.33343	0.0196257	0.396964	-0.017073	0.437722	-0.0390043	0.968887	0.986695	ALG10B
ENSG00000133740	1.7164	0.467656	3.67023	0.000242335	0.00701098	-0.631544	0.58552	-1.0786	0.280764	0.851599	1.12828	0.47657	2.3675	0.0179088	0.0799715	E2F5
ENSG00000163393	-2.56769	0.699603	-3.6702	0.000242357	0.00701098	0.652142	0.647084	1.00782	0.313542	0.866147	-1.87487	0.886206	-2.11561	0.0343776	0.12636	SLC22A15
ENSG00000283709	-2.96016	0.806991	-3.66814	0.000244322	0.0070573	0.889168	0.954023	0.932019	0.351327	0.88296	-2.02841	0.948179	-2.13927	NaN	NaN	FAM238C
ENSG00000158008	-2.31772	0.632201	-3.66612	0.000246261	0.00710271	-0.314766	0.677758	-0.464423	0.642345	0.96361	-2.58885	0.690324	-3.75019	0.0001767	0.00258438	EXTL1
ENSG00000163531	-2.12522	0.580269	-3.66247	0.000249795	0.00719285	0.710657	0.634492	1.12004	0.262696	0.841922	-1.35842	0.296509	-4.58136	4.61952e-06	0.000143588	NFASC
ENSG00000176406	-3.98789	1.08899	-3.66201	0.000250239	0.00719285	-0.325137	0.982319	-0.330989	0.740653	0.977694	-4.2518	0.917987	-4.63166	3.62743e-06	0.000118331	RIMS2
ENSG00000160460	-2.40091	0.655674	-3.66175	0.000250499	0.00719285	-0.0352814	0.743952	-0.0474243	0.962175	0.996417	-2.38713	0.582745	-4.09636	4.19693e-05	0.000832246	SPTBN4
ENSG00000164082	-3.20327	0.87534	-3.65946	0.000252752	0.00724679	-0.643155	0.817156	-0.787065	0.431244	0.911878	-3.80003	0.816905	-4.65174	3.2914e-06	0.00011019	GRM2
ENSG00000279619	-3.65421	0.999674	-3.6554	0.000256783	0.00735151	1.15456	1.10759	1.0424	0.297227	0.856212	-2.45353	1.1653	-2.10548	0.0352494	0.128416	AC020907.5
ENSG00000186481	-3.54928	0.971238	-3.65438	0.000257802	0.00736979	0.0908723	1.06826	0.0850657	0.932209	0.993675	-3.42019	0.986758	-3.46609	0.000528086	0.00584195	ANKRD20A5P
ENSG00000111247	2.60159	0.712617	3.65075	0.000261476	0.00745282	-0.460485	0.768531	-0.599176	0.549055	0.944826	2.17903	0.714909	3.04799	0.0023038	0.0174621	RAD51AP1
ENSG00000166900	-1.93397	0.529698	-3.65108	0.000261143	0.00745282	0.496413	0.646079	0.768347	0.442281	0.916115	-1.39899	0.726438	-1.92582	0.0541263	0.173055	STX3
ENSG00000267317	1.74204	0.477359	3.64934	0.000262913	0.00747198	0.833966	0.621407	1.34206	0.179576	0.774166	2.61783	0.548992	4.76842	1.85675e-06	7.22884e-05	AC027307.2
ENSG00000251442	-2.20518	0.604269	-3.64934	0.000262919	0.00747198	-0.157653	0.733993	-0.214788	0.829933	0.985231	-2.31771	0.70552	-3.28511	0.00101942	0.00956027	LINC01094
ENSG00000188486	1.4466	0.396758	3.64605	0.000266298	0.00752266	-0.135136	0.521521	-0.259118	0.795544	0.984062	1.35448	0.492756	2.74879	0.00598163	0.0351182	H2AFX
ENSG00000206503	2.04858	0.561883	3.64592	0.000266437	0.00752266	0.278116	0.521822	0.532971	0.594054	0.952991	2.38026	0.682291	3.48862	0.000485516	0.00547093	HLA-A
ENSG00000174516	-1.86076	0.510304	-3.64638	0.000265963	0.00752266	-0.101777	0.527483	-0.192948	0.847	0.987761	-1.9127	0.420146	-4.55247	5.30197e-06	0.000160198	PELI3
ENSG00000134533	-3.57012	0.979263	-3.64572	0.000266643	0.00752266	0.00800624	0.842307	0.00950514	0.992416	0.999574	-3.51026	0.991603	-3.53998	0.000400153	0.00473936	RERG
ENSG00000156299	-1.19214	0.326907	-3.64672	0.000265608	0.00752266	-0.193172	0.36879	-0.5238	0.600418	0.955559	-1.33893	0.316685	-4.22796	2.35818e-05	0.000520542	TIAM1
ENSG00000178115	-3.28126	0.900231	-3.64491	0.000267483	0.00752352	2.45045	1.03586	2.36562	0.0179999	0.381536	-0.776345	1.38756	-0.559505	0.575817	NaN	GOLGA8Q
ENSG00000095015	1.48656	0.407882	3.64457	0.000267838	0.00752352	0.277938	0.368505	0.754232	0.45071	0.917839	1.81012	0.427113	4.23804	2.25476e-05	0.000503528	MAP3K1
ENSG00000186868	-1.42897	0.392074	-3.64463	0.000267776	0.00752352	-0.743548	0.437106	-1.70107	0.0889297	0.656783	-2.12166	0.32262	-6.57635	4.82142e-11	1.03558e-08	MAPT
ENSG00000128595	1.39771	0.38387	3.6411	0.000271476	0.00761467	0.182844	0.33991	0.537918	0.590634	0.95188	1.62506	0.419387	3.87484	0.000106696	0.00174624	CALU
ENSG00000244038	1.3335	0.366286	3.64058	0.000272022	0.00761494	0.171567	0.322553	0.531903	0.594793	0.953524	1.55199	0.401171	3.86864	0.000109443	0.00177745	DDOST
ENSG00000126003	0.980073	0.269225	3.64035	0.000272271	0.00761494	0.226973	0.345661	0.656635	0.511415	0.937754	1.25155	0.265174	4.71974	2.36148e-06	8.5985e-05	PLAGL2
ENSG00000189195	-3.39373	0.932662	-3.63876	0.000273955	0.00764658	-0.169818	0.889941	-0.19082	0.848667	0.987761	-3.51393	0.923607	-3.80457	0.000142051	0.00217933	BTBD8
ENSG00000108370	-1.67667	0.46081	-3.63854	0.000274191	0.00764658	-0.544898	0.58356	-0.933747	0.350434	0.882278	-2.16991	0.594733	-3.64854	0.000263738	0.00347697	RGS9
ENSG00000249335	-3.60456	0.992796	-3.63071	0.000282639	0.00787083	1.27517	0.660907	1.92942	0.0536783	0.572261	-2.2824	1.28063	-1.78224	0.0747097	0.216476	AC093523.1
ENSG00000213983	-1.30161	0.35864	-3.62929	0.000284198	0.00789158	0.927442	0.602483	1.53936	0.123715	0.702589	-0.335475	0.590668	-0.56796	0.570062	0.760932	AP1G2
ENSG00000198885	1.65987	0.457327	3.62952	0.000283953	0.00789158	1.74808	0.66569	2.62597	0.00864032	0.267663	3.44207	0.497045	6.92507	4.35754e-12	1.24327e-09	ITPRIPL1
ENSG00000106123	-3.61734	0.997529	-3.6263	0.000287511	0.00797217	-0.0917263	0.989222	-0.0927257	0.926121	0.993516	-3.65215	0.81086	-4.50405	6.66718e-06	0.000191943	EPHB6
ENSG00000267750	-2.58271	0.712432	-3.6252	0.00028874	0.00799479	-0.102277	0.583483	-0.175287	0.860854	0.989921	-2.64293	0.723474	-3.65311	0.000259085	0.0034322	RUNDC3A-AS1
ENSG00000243156	-0.931948	0.257133	-3.62439	0.000289649	0.00799711	0.058929	0.387875	0.151928	0.879244	0.990789	-0.830022	0.351249	-2.36306	0.0181247	0.0806874	MICAL3
ENSG00000166402	-1.49726	0.413092	-3.62451	0.000289504	0.00799711	-1.2327	0.449234	-2.744	0.00606958	0.220044	-2.67808	0.446365	-5.99976	1.97615e-09	2.45299e-07	TUB
ENSG00000177098	-2.89074	0.797935	-3.62278	0.000291459	0.00802423	0.618193	0.668594	0.924616	0.355165	0.883039	-2.23014	0.803726	-2.77475	0.00552443	0.0331154	SCN4B
ENSG00000099282	-1.71951	0.4746	-3.62308	0.000291117	0.00802423	-0.122008	0.527213	-0.231421	0.816988	0.984454	-1.79166	0.487722	-3.67353	0.00023922	0.00323862	TSPAN15
ENSG00000097096	-2.73705	0.755595	-3.62237	0.000291911	0.00802529	-0.034634	0.659351	-0.0525274	0.958108	0.995876	-2.71325	0.701859	-3.86581	0.00011072	0.00179064	SYDE2
ENSG00000153446	-2.44659	0.676027	-3.61907	0.00029566	0.00811683	0.792284	0.535809	1.47867	0.139229	0.728086	-1.63004	0.861697	-1.89166	0.0585363	0.182393	C16orf89
ENSG00000140254	-3.61112	0.998106	-3.61797	0.000296918	0.00813545	1.61361	1.0633	1.51755	0.129128	0.710896	-1.97133	1.1268	-1.74949	0.0802057	NaN	DUOXA1
ENSG00000138600	1.22038	0.33733	3.61775	0.000297178	0.00813545	-1.00134	0.412067	-2.43003	0.0150976	0.355902	0.270191	0.40383	0.66907	0.503451	0.713045	SPPL2A
ENSG00000251322	-2.4011	0.664132	-3.61539	0.000299897	0.00819831	0.0556538	0.746236	0.0745794	0.940549	0.994037	-2.29924	0.660937	-3.47875	0.000503758	0.00561179	SHANK3
ENSG00000101138	1.07778	0.298206	3.61422	0.000301251	0.00821216	-0.554393	0.404004	-1.37225	0.169987	0.765119	0.571468	0.353471	1.61673	0.105936	0.273188	CSTF1
ENSG00000162458	2.80522	0.776086	3.61458	0.000300838	0.00821216	1.97453	0.647273	3.05054	0.00228432	0.130611	4.81702	0.799333	6.0263	1.67758e-09	2.18154e-07	FBLIM1
ENSG00000055732	-4.91751	1.36223	-3.60989	0.000306324	0.00833872	5.38493	1.47182	3.6587	0.000253502	0.0358806	0.579241	3.66181	0.158185	0.874311	NaN	MCOLN3
ENSG00000233251	-2.65705	0.736152	-3.60937	0.000306937	0.00834369	-0.386655	0.60496	-0.639142	0.522731	0.94059	-2.99118	0.688053	-4.3473	1.37823e-05	0.000336908	AC007743.1
ENSG00000144791	1.55609	0.43125	3.60833	0.000308179	0.00836573	0.785661	0.62068	1.26581	0.205582	0.79497	2.38063	0.558737	4.26073	2.03757e-05	0.00046613	LIMD1
ENSG00000232855	-2.52016	0.69877	-3.60656	0.000310284	0.00841109	0.032961	0.825785	0.0399147	0.968161	0.997155	-2.44246	0.87067	-2.80526	0.00502755	0.0310422	AF165147.1
ENSG00000158286	-3.1398	0.871009	-3.60479	0.00031241	0.00845689	0.251409	0.873548	0.287802	0.773498	0.982232	-2.84292	1.06106	-2.67932	0.00737727	0.0411729	RNF207
ENSG00000272720	-2.04126	0.566442	-3.60365	0.000313785	0.00848225	0.61187	0.908535	0.673469	0.500649	0.932687	-1.4107	1.03337	-1.36515	0.172206	0.37738	AL022322.1
ENSG00000123374	1.6568	0.459972	3.60195	0.000315838	0.00851402	0.558315	0.581164	0.960684	0.336711	0.877202	2.2533	0.424416	5.30919	1.10115e-07	7.30886e-06	CDK2
ENSG00000133067	-3.87359	1.07534	-3.60221	0.000315529	0.00851402	4.10326	1.13238	3.62358	0.000290554	0.0391306	0.290589	1.14205	0.254445	0.799152	0.903192	LGR6
ENSG00000172375	-1.68579	0.468292	-3.59987	0.000318376	0.00853836	-0.191996	0.559635	-0.343073	0.731543	0.975846	-1.83245	0.433115	-4.23085	2.32806e-05	0.000515681	C2CD2L
ENSG00000173064	-1.03236	0.286704	-3.60079	0.000317256	0.00853836	0.0606478	0.373927	0.162191	0.871155	0.990467	-0.927443	0.281776	-3.29142	0.000996833	0.00940546	HECTD4
ENSG00000137804	2.54779	0.707765	3.59977	0.000318503	0.00853836	2.00816	0.989377	2.02972	0.0423853	0.533997	4.59948	1.01041	4.55207	5.31214e-06	0.000160198	NUSAP1
ENSG00000067840	-2.10477	0.584681	-3.59987	0.000318381	0.00853836	-0.386053	0.641229	-0.602053	0.547139	0.943665	-2.43646	0.336525	-7.24006	4.48495e-13	1.74968e-10	PDZD4
ENSG00000278867	-1.4691	0.408631	-3.59517	0.000324174	0.00865448	0.497516	0.537994	0.924761	0.35509	0.883039	-0.926999	0.576383	-1.6083	0.107769	0.276416	AC090616.6
ENSG00000120278	1.25064	0.347839	3.59544	0.000323838	0.00865448	-0.313773	0.415892	-0.754459	0.450574	0.917692	0.98682	0.438374	2.25109	0.0243798	0.0992216	PLEKHG1
ENSG00000185088	1.54969	0.43103	3.59532	0.000323991	0.00865448	-1.09826	0.559464	-1.96306	0.0496395	0.560601	0.505504	0.574916	0.879265	0.379258	0.610414	RPS27L
ENSG00000260750	-3.74406	1.04163	-3.59442	0.000325112	0.00866527	0.986773	0.981954	1.00491	0.314942	0.867106	-2.72469	1.14574	-2.3781	0.017402	0.0781619	AC092720.1
ENSG00000175077	-4.43751	1.23465	-3.59413	0.000325473	0.00866527	1.38228	1.04725	1.31991	0.186864	0.777302	-3.0442	1.41301	-2.15441	0.0312082	NaN	RTP1
ENSG00000059122	-0.979521	0.272656	-3.59252	0.000327494	0.00870712	0.379909	0.354543	1.07155	0.283923	0.852978	-0.558599	0.275393	-2.02837	0.0425222	0.145987	FLYWCH1
ENSG00000188313	1.31276	0.365625	3.59047	0.000330088	0.00876406	1.16933	0.465926	2.5097	0.0120835	0.317341	2.53337	0.437737	5.78742	7.14754e-09	7.26768e-07	PLSCR1
ENSG00000255639	1.93379	0.538738	3.58948	0.000331344	0.00877144	-0.754202	0.618783	-1.21885	0.222902	0.813109	1.21538	0.46383	2.62031	0.00878502	0.0470273	AC005833.1
ENSG00000165566	-1.49868	0.417556	-3.58918	0.000331724	0.00877144	-0.867877	0.468956	-1.85066	0.064219	0.607062	-2.31292	0.451028	-5.1281	2.92681e-07	1.72007e-05	AMER2
ENSG00000153094	1.47701	0.411498	3.58935	0.000331502	0.00877144	-1.12238	0.577608	-1.94316	0.0519974	0.567056	0.401664	0.548485	0.732314	0.463977	0.683807	BCL2L11
ENSG00000188483	2.15607	0.60124	3.58604	0.000335731	0.00886532	-0.0184623	0.602012	-0.0306676	0.975535	0.997418	2.18322	0.486101	4.4913	7.07888e-06	0.000200177	IER5L
ENSG00000174145	-4.73135	1.3197	-3.58518	0.000336849	0.00888274	-0.661528	1.87522	-0.352774	0.724258	0.973789	-5.35145	0.932491	-5.73887	9.53113e-09	9.34439e-07	NWD2
ENSG00000240972	1.52034	0.424289	3.58325	0.000339341	0.00892416	-0.359067	0.419497	-0.855948	0.392027	0.898741	1.21104	0.4558	2.65696	0.00788493	0.0431515	MIF
ENSG00000152078	-2.73342	0.762796	-3.58343	0.000339112	0.00892416	0.290103	0.799157	0.363011	0.716597	0.973099	-2.39119	0.639946	-3.73654	0.000186566	0.0026896	TLCD4
ENSG00000203709	-1.81902	0.508203	-3.57932	0.000344486	0.00904719	0.552868	0.67596	0.8179	0.413414	0.904165	-1.22594	0.685627	-1.78806	0.0737668	0.214435	MIR29B2CHG
ENSG00000138413	1.75517	0.490529	3.57812	0.000346077	0.00906996	-0.232249	0.509382	-0.455943	0.648431	0.964326	1.56842	0.499012	3.14305	0.00167196	0.0136996	IDH1
ENSG00000248383	-2.06217	0.576364	-3.5779	0.000346369	0.00906996	-0.0842194	0.606977	-0.138752	0.889646	0.990938	-2.11961	0.441736	-4.79836	1.59968e-06	6.39737e-05	PCDHAC1
ENSG00000113319	-3.44597	0.963246	-3.57746	0.000346955	0.00906996	0.0716444	0.994399	0.072048	0.942564	0.99439	-3.32779	0.939442	-3.5423	0.00039665	0.00471781	RASGRF2
ENSG00000115616	-3.84892	1.07594	-3.57725	0.000347225	0.00906996	-0.186922	0.904288	-0.206706	0.83624	0.985687	-4.02	0.750362	-5.35741	8.44214e-08	5.8471e-06	SLC9A2
ENSG00000167123	-2.29349	0.641508	-3.57515	0.000350024	0.00912072	1.55219	0.79167	1.96066	0.0499187	0.561536	-0.709999	0.568197	-1.24957	0.211458	0.429662	CERCAM
ENSG00000225345	-4.01954	1.12432	-3.57509	0.000350109	0.00912072	1.05192	0.926777	1.13503	0.256364	0.838529	-2.93129	1.33738	-2.19182	0.0283926	0.110631	SNX18P3
ENSG00000267426	-4.96797	1.38997	-3.57415	0.00035137	0.00914128	2.41823	1.22108	1.9804	0.0476591	0.554713	-2.56891	2.11795	-1.21292	0.225159	NaN	AC087289.3
ENSG00000128050	1.06375	0.29769	3.57334	0.000352451	0.00914485	-0.677851	0.514583	-1.31728	0.187744	0.778069	0.433379	0.499275	0.868017	0.385385	0.61673	PAICS
ENSG00000152784	-3.98226	1.11442	-3.57339	0.000352386	0.00914485	-0.0382756	0.779937	-0.0490753	0.960859	0.996198	-3.96932	1.11876	-3.54795	0.000388243	0.00463853	PRDM8
ENSG00000153531	-1.96381	0.549706	-3.57246	0.000353637	0.00916336	0.518883	0.621385	0.835043	0.403693	0.90265	-1.39758	0.505779	-2.76322	0.00572335	0.0339923	ADPRHL1
ENSG00000146122	-2.98635	0.836195	-3.57135	0.000355141	0.0091778	-1.97708	0.703021	-2.81226	0.00491944	0.199691	-4.91728	0.985203	-4.99113	6.00256e-07	2.97656e-05	DAAM2
ENSG00000176076	-3.06385	0.857845	-3.57156	0.000354859	0.0091778	2.49498	0.877698	2.84265	0.00447408	0.188639	-0.549054	0.809685	-0.678108	0.497703	0.709266	KCNE5
ENSG00000284624	-3.10856	0.87087	-3.56949	0.000357683	0.00918291	1.2394	0.779278	1.59044	0.111735	0.686062	-1.84566	0.979875	-1.88357	0.0596238	0.184656	AC092902.4
ENSG00000101003	1.91158	0.535588	3.56912	0.000358182	0.00918291	0.31363	0.484974	0.646696	0.517829	0.939343	2.26736	0.593994	3.81714	0.000135006	0.00209649	GINS1
ENSG00000160801	-2.32789	0.652218	-3.5692	0.000358075	0.00918291	0.280821	0.672037	0.417865	0.676045	0.967176	-1.99202	0.421431	-4.72681	2.28079e-06	8.4122e-05	PTH1R
ENSG00000131242	-2.85982	0.801157	-3.56961	0.000357513	0.00918291	-0.313231	0.612215	-0.511636	0.608906	0.956144	-3.12559	0.844557	-3.70087	0.000214862	0.0029893	RAB11FIP4
ENSG00000117016	-3.42733	0.959922	-3.57042	0.000356406	0.00918291	-0.03745	0.948865	-0.0394682	0.968517	0.997155	-3.40975	0.798914	-4.26798	1.97247e-05	0.000453739	RIMS3
ENSG00000255073	-6.79455	1.90285	-3.57073	0.000355989	0.00918291	1.34037	1.54691	0.866482	0.386226	0.896776	-5.45136	2.30434	-2.36569	0.0179963	NaN	ZFP91-CNTF
ENSG00000167695	1.68499	0.472189	3.56846	0.00035908	0.00919377	-0.459674	0.608265	-0.755713	0.449821	0.917662	1.26744	0.500265	2.53353	0.011292	0.056206	TLCD3A
ENSG00000168615	1.2981	0.363932	3.56688	0.000361262	0.00922548	0.290793	0.403367	0.720913	0.470963	0.92574	1.63311	0.352929	4.6273	3.70462e-06	0.000120136	ADAM9
ENSG00000083444	1.69098	0.47408	3.56687	0.00036127	0.00922548	0.418401	0.433394	0.965406	0.334341	0.874505	2.14828	0.493831	4.35024	1.35988e-05	0.000335262	PLOD1
ENSG00000144199	-1.32797	0.372485	-3.56515	0.000363644	0.00926168	0.508856	0.540611	0.941262	0.346571	0.880887	-0.782425	0.529833	-1.47674	0.139746	0.328714	FAHD2B
ENSG00000179314	1.73264	0.485976	3.56528	0.000363472	0.00926168	-0.677737	0.578118	-1.17232	0.24107	0.828351	1.10223	0.510647	2.15849	0.03089	0.117115	WSCD1
ENSG00000107331	-1.97276	0.553536	-3.56393	0.000365348	0.00926854	0.734108	0.626606	1.17156	0.241373	0.82843	-1.19877	0.347269	-3.45199	0.000556464	0.00607503	ABCA2
ENSG00000261329	-3.18631	0.893954	-3.56429	0.000364848	0.00926854	1.14575	0.725091	1.58015	0.114072	0.688425	-1.99724	0.945236	-2.11295	0.0346052	0.126809	AC016597.1
ENSG00000187498	1.99538	0.559844	3.56417	0.000365012	0.00926854	2.56362	0.669646	3.82832	0.000129022	0.0226491	4.58818	0.511574	8.96875	2.99903e-19	4.09497e-16	COL4A1
ENSG00000232233	-3.31063	0.929024	-3.56355	0.000365868	0.00926961	0.891948	0.8904	1.00174	0.31647	0.867382	-2.39988	1.14156	-2.10227	0.0355296	NaN	LINC02043
ENSG00000186529	-4.64994	1.30505	-3.56302	0.000366608	0.00927624	1.20476	1.07614	1.11951	0.262921	0.841922	-3.39811	1.19338	-2.84747	0.00440678	0.028316	CYP4F3
ENSG00000248994	-4.45088	1.24945	-3.56226	0.000367672	0.0092904	0.0426795	1.07326	0.0397664	0.968279	0.997155	-4.35958	1.35821	-3.20979	0.00132832	0.0116424	AC124852.1
ENSG00000099284	-2.96328	0.831928	-3.56194	0.000368126	0.0092904	-1.58484	0.789533	-2.00731	0.0447166	0.546152	-4.49881	0.665591	-6.75913	1.38824e-11	3.44645e-09	H2AFY2
ENSG00000254413	-2.49179	0.699676	-3.56134	0.000368965	0.00929945	1.80402	0.716933	2.5163	0.0118593	0.315884	-0.664955	0.736489	-0.902871	0.366594	0.599468	CHKB-CPT1B
ENSG00000148842	-1.25907	0.353572	-3.561	0.000369451	0.00929962	-0.528466	0.399833	-1.32172	0.186263	0.777302	-1.73786	0.338232	-5.13808	2.77555e-07	1.64265e-05	CNNM2
ENSG00000104064	1.20808	0.339423	3.55922	0.000371961	0.00934068	0.0408299	0.438856	0.0930372	0.925874	0.993516	1.2885	0.351896	3.66159	0.000250652	0.00335777	GABPB1
ENSG00000005059	1.91926	0.539245	3.55916	0.000372046	0.00934068	2.63069	0.578666	4.54613	5.46405e-06	0.00273366	4.58278	0.595596	7.69444	1.42113e-14	7.76181e-12	MCUB
ENSG00000260807	-2.0993	0.590214	-3.55685	0.000375329	0.00939355	0.34053	0.666032	0.511282	0.609154	0.956144	-1.72215	0.390652	-4.4084	1.04138e-05	0.000270374	AC009041.2
ENSG00000274253	-4.40333	1.23805	-3.55668	0.000375574	0.00939355	-0.232842	0.975471	-0.238698	0.81134	0.984422	-4.58812	1.16614	-3.93444	8.33905e-05	0.00144001	AC138649.1
ENSG00000237238	2.46382	0.692827	3.55619	0.000376278	0.00939355	1.63719	0.97085	1.68635	0.0917289	0.663464	4.11356	0.898166	4.57995	4.65081e-06	0.000144326	BMS1P10
ENSG00000165891	2.41176	0.678228	3.55598	0.000376576	0.00939355	0.856566	0.856113	1.00053	0.317055	0.867382	3.31111	0.922775	3.58821	0.000332955	0.00418191	E2F7
ENSG00000172987	-4.36372	1.22705	-3.55626	0.000376169	0.00939355	-3.37291	1.02888	-3.27822	NaN	NaN	-7.64831	1.15974	-6.59485	NaN	NaN	HPSE2
ENSG00000102445	1.51137	0.425195	3.55453	0.000378649	0.00943314	1.32822	0.551717	2.40743	0.016065	0.36327	2.87855	0.429311	6.70504	2.01351e-11	4.81127e-09	RUBCNL
ENSG00000151067	-2.32733	0.654814	-3.55418	0.000379153	0.00943355	-0.0335365	0.635214	-0.0527956	0.957895	0.995876	-2.31651	0.730354	-3.17176	0.00151519	0.0127765	CACNA1C
ENSG00000139190	-2.60389	0.732921	-3.55276	0.000381218	0.00947277	0.218743	0.761287	0.287334	0.773857	0.982232	-2.3289	0.494833	-4.70644	2.52077e-06	9.04072e-05	VAMP1
ENSG00000154839	2.51626	0.708364	3.55221	0.000382012	0.00948036	1.12557	0.828348	1.35881	0.174207	0.768042	3.6764	0.766835	4.79425	1.63281e-06	6.48915e-05	SKA1
ENSG00000159216	1.956	0.550713	3.55175	0.000382674	0.00948464	1.79014	0.613145	2.91961	0.00350469	0.164638	3.78544	0.55501	6.82049	9.07323e-12	2.40894e-09	RUNX1
ENSG00000172348	-3.08467	0.868741	-3.55074	0.000384154	0.00950916	0.0291012	0.932881	0.0311949	0.975114	0.997418	-3.00544	0.803409	-3.74086	0.000183393	0.00265254	RCAN2
ENSG00000259895	-2.6004	0.732806	-3.54856	0.000387349	0.00956634	1.18395	0.777399	1.52296	0.127769	0.708113	-1.37252	1.02503	-1.33901	0.180568	NaN	AC106820.2
ENSG00000107317	-3.32817	0.937911	-3.54849	0.000387451	0.00956634	-0.444003	0.915468	-0.485001	0.627675	0.960017	-3.71492	0.664883	-5.58733	2.30593e-08	1.97669e-06	PTGDS
ENSG00000155760	2.39667	0.675707	3.54691	0.000389771	0.00961138	0.35249	0.808	0.43625	0.662655	0.966563	2.80397	0.928345	3.0204	0.00252442	0.0187332	FZD7
ENSG00000177602	2.46415	0.695006	3.5455	0.000391863	0.00965069	1.48832	1.09928	1.35391	0.175764	0.769757	3.98948	0.884589	4.50998	6.48326e-06	0.000187211	HASPIN
ENSG00000226581	-4.6557	1.31331	-3.54501	0.000392604	0.00965666	-0.290611	0.76603	-0.379373	0.704411	0.971503	-4.94877	1.20983	-4.09047	4.30501e-05	0.000849273	LINC02848
ENSG00000196639	1.44525	0.407922	3.54295	0.000395677	0.00971991	-0.0129017	0.398518	-0.0323743	0.974174	0.997418	1.47445	0.438073	3.36575	0.000763363	0.00772087	HRH1
ENSG00000253284	-2.50778	0.708065	-3.54173	0.000397505	0.00974454	0.394387	0.600853	0.656378	0.511581	0.937754	-2.0786	0.894845	-2.32286	0.0201865	0.0869109	AC092828.1
ENSG00000135740	-1.67927	0.474153	-3.54162	0.000397685	0.00974454	0.25375	0.590034	0.430059	0.667152	0.966563	-1.38168	0.569539	-2.42596	0.015268	0.0708921	SLC9A5
ENSG00000284299	-2.59148	0.732239	-3.53912	0.000401463	0.00982468	-0.613926	0.756914	-0.811091	0.417313	0.904994	-3.16185	0.866215	-3.65018	0.000262053	0.00345714	AL590132.1
ENSG00000167434	-3.65237	1.03249	-3.53744	0.000404024	0.00986246	-0.788305	0.933608	-0.844363	0.398467	0.900444	-4.40372	0.795698	-5.53441	3.12282e-08	2.53773e-06	CA4
ENSG00000276410	2.93924	0.830888	3.53746	0.00040399	0.00986246	-0.00823126	0.945216	-0.00870834	0.993052	0.999574	2.97401	0.821047	3.62221	0.000292096	0.00374746	HIST1H2BB
ENSG00000223944	-4.1296	1.16808	-3.53539	0.000407178	0.00990961	-0.308381	0.938109	-0.328726	0.742363	0.977694	-4.38451	1.22752	-3.57185	0.000354474	0.00434685	AL353604.1
ENSG00000134030	-1.42684	0.40361	-3.53519	0.00040749	0.00990961	-0.161443	0.336508	-0.479759	0.631399	0.960968	-1.54195	0.43254	-3.56487	0.000364033	0.00443204	CTIF
ENSG00000143870	1.39828	0.395523	3.53527	0.000407365	0.00990961	-0.60082	0.442373	-1.35817	0.174408	0.768271	0.849104	0.490532	1.73098	0.0834547	0.232623	PDIA6
ENSG00000053702	-3.34906	0.947854	-3.53331	0.000410397	0.0099678	0.495081	0.859208	0.576207	0.564475	0.947219	-2.80958	0.689589	-4.07428	4.61575e-05	0.000899048	NRIP2
ENSG00000179593	-2.64179	0.747943	-3.53207	0.000412313	0.0100018	2.22924	0.907991	2.45513	0.0140833	0.343499	-0.381897	1.03081	-0.370481	0.711024	NaN	ALOX15B
ENSG00000267121	-2.38944	0.676906	-3.52995	0.000415644	0.0100327	0.663377	0.989724	0.670265	0.502689	0.933667	-1.69605	0.994023	-1.70624	0.0879626	0.241698	AC008105.3
ENSG00000113361	1.76029	0.498683	3.52989	0.000415735	0.0100327	-0.194034	0.554904	-0.349672	0.726585	0.974473	1.61925	0.435329	3.71959	0.000199545	0.00282347	CDH6
ENSG00000181104	2.2203	0.628974	3.53003	0.000415508	0.0100327	-1.26976	0.864493	-1.46879	0.141889	0.731986	0.990199	0.709236	1.39615	0.16267	0.363314	F2R
ENSG00000168280	-2.08055	0.589246	-3.53088	0.000414186	0.0100327	-0.0503476	0.651144	-0.0773217	0.938368	0.994037	-2.07972	0.461076	-4.51058	6.46501e-06	0.000186967	KIF5C
ENSG00000233639	1.24121	0.351691	3.52928	0.000416693	0.0100327	-0.166661	0.402295	-0.414274	0.678673	0.967429	1.12432	0.396939	2.83248	0.00461891	0.0292464	PANTR1
ENSG00000184205	-2.54093	0.719919	-3.52946	0.000416401	0.0100327	0.243367	0.777144	0.313155	0.754163	0.980534	-2.24786	0.653067	-3.44201	0.000577409	0.00625723	TSPYL2
ENSG00000251429	-2.64483	0.749635	-3.52816	0.000418461	0.0100503	1.02171	0.749403	1.36336	0.172769	0.765269	-1.58004	0.595076	-2.6552	0.0079262	0.0433198	AC098679.2
ENSG00000115602	-3.55543	1.00765	-3.52843	0.000418033	0.0100503	2.20926	1.27432	1.73368	0.0829756	0.643608	-1.31362	1.72492	-0.761556	0.446325	NaN	IL1RL1
ENSG00000196230	1.44731	0.410276	3.52765	0.000419269	0.0100573	-0.202086	0.419176	-0.482103	0.629733	0.960126	1.29047	0.445357	2.8976	0.00376025	0.0250456	TUBB
ENSG00000250490	-2.75958	0.78243	-3.52693	0.000420403	0.010072	1.00303	0.701226	1.4304	0.152602	0.744896	-1.65548	1.00424	-1.64848	0.0992545	NaN	LINC02145
ENSG00000164669	-2.87305	0.81484	-3.52591	0.000422031	0.0100985	0.386381	0.657743	0.587434	0.556912	0.946089	-2.44837	0.93297	-2.62428	0.00868325	0.0466655	INTS4P1
ENSG00000204209	0.923833	0.262178	3.52369	0.000425581	0.0101584	-0.377855	0.421216	-0.897058	0.369688	0.88995	0.595213	0.3837	1.55124	0.120843	0.298704	DAXX
ENSG00000119408	1.60682	0.45599	3.5238	0.000425413	0.0101584	0.0653815	0.498014	0.131285	0.89555	0.991461	1.71418	0.435369	3.9373	8.24026e-05	0.00142682	NEK6
ENSG00000164181	-2.09586	0.594942	-3.5228	0.000427021	0.0101802	-0.191539	0.598798	-0.319872	0.749066	0.97856	-2.2399	0.510127	-4.39087	1.12898e-05	0.000288138	ELOVL7
ENSG00000120992	1.35583	0.384997	3.52166	0.000428852	0.0102113	-0.486271	0.471785	-1.0307	0.302679	0.859297	0.916423	0.424085	2.16094	0.0306997	0.116648	LYPLA1
ENSG00000066279	2.5694	0.730832	3.51571	0.000438572	0.0104088	2.23409	0.796014	2.8066	0.00500677	0.2016	4.8389	0.807165	5.99493	2.03571e-09	2.51062e-07	ASPM
ENSG00000132681	-2.39433	0.68105	-3.51565	0.00043868	0.0104088	1.94864	0.705664	2.76143	0.00575488	0.216542	-0.401267	0.741402	-0.541227	0.588351	0.77309	ATP1A4
ENSG00000167363	-1.63252	0.464365	-3.5156	0.000438757	0.0104088	-0.0540258	0.487948	-0.11072	0.911838	0.992092	-1.6332	0.346201	-4.7175	2.38763e-06	8.66073e-05	FN3K
ENSG00000235655	1.97624	0.562379	3.51407	0.00044129	0.0104561	-1.23003	0.658489	-1.86797	0.0617668	0.598877	0.791707	0.51373	1.5411	0.123293	0.302756	H3F3AP4
ENSG00000188933	-2.21089	0.630326	-3.50754	0.000452276	0.0107033	0.177575	0.760657	0.233449	0.815413	0.984454	-2.00235	0.9342	-2.14339	0.0320822	0.120251	USP32P1
ENSG00000173402	1.52676	0.4354	3.50658	0.000453899	0.0107286	-0.888153	0.503982	-1.76227	0.0780234	0.636565	0.689611	0.583435	1.18198	0.237212	0.462445	DAG1
ENSG00000213199	-2.04236	0.582534	-3.50599	0.000454913	0.0107314	1.05904	0.667732	1.58603	0.112733	0.687858	-0.9513	0.645877	-1.47288	0.140783	0.330209	ASIC3
ENSG00000162975	2.69366	0.768329	3.50587	0.000455125	0.0107314	-1.70141	0.683341	-2.48984	0.01278	0.328861	1.05037	0.660581	1.59007	0.111819	0.283155	KCNF1
ENSG00000163517	-1.67356	0.477463	-3.50511	0.000456421	0.0107359	-0.655405	0.528726	-1.23959	0.215126	0.805073	-2.27983	0.380887	-5.98559	2.15601e-09	2.61971e-07	HDAC11
ENSG00000100181	-3.17596	0.906047	-3.50529	0.000456102	0.0107359	1.3488	0.76651	1.75967	0.078464	0.636754	-1.83362	0.84895	-2.15986	0.0307833	0.116896	TPTEP1
ENSG00000227544	-2.10589	0.601224	-3.50267	0.000460622	0.0108215	-0.271383	0.562429	-0.48252	0.629437	0.960017	-2.33164	0.499317	-4.66967	3.0169e-06	0.000103925	AC018647.1
ENSG00000102452	-2.31314	0.660506	-3.50207	0.000461663	0.0108329	-0.321231	0.623933	-0.514849	0.606659	0.956144	-2.57847	0.573375	-4.497	6.89177e-06	0.000196642	NALCN
ENSG00000111275	-1.50872	0.431043	-3.50017	0.000464968	0.0108972	-1.59303	0.503971	-3.16095	0.00157254	0.103861	-3.04966	0.459504	-6.63685	3.20462e-11	7.29281e-09	ALDH2
ENSG00000067842	-4.30844	1.23188	-3.49745	0.000469734	0.0109889	-0.126694	1.21396	-0.104364	0.916881	0.992525	-4.36224	0.834125	-5.22972	1.69767e-07	1.06752e-05	ATP2B3
ENSG00000047936	-4.40626	1.25997	-3.49711	0.00047033	0.0109889	1.63358	2.32057	0.703958	0.481459	0.92808	-2.72097	1.37209	-1.98309	0.0473574	0.157794	ROS1
ENSG00000157103	-1.88458	0.538919	-3.49697	0.00047058	0.0109889	-0.758321	0.5417	-1.39989	0.161546	0.757462	-2.58777	0.504668	-5.12768	2.93337e-07	1.72007e-05	SLC6A1
ENSG00000250575	-2.00066	0.572184	-3.49653	0.000471349	0.0109936	0.901333	1.07737	0.836605	0.402815	0.90265	-1.06748	1.19074	-0.896486	0.369993	0.602247	AL732372.3
ENSG00000139292	-3.00388	0.859195	-3.49615	0.000472023	0.0109961	-0.141742	0.792404	-0.178876	0.858035	0.989147	-3.10098	0.812846	-3.81496	0.000136204	0.00210787	LGR5
ENSG00000166888	-1.66068	0.475064	-3.4957	0.000472826	0.0110016	0.890895	0.544094	1.63739	0.101549	0.675303	-0.731733	0.53647	-1.36398	0.172575	0.378058	STAT6
ENSG00000108829	0.985409	0.281948	3.495	0.000474059	0.0110038	-0.563988	0.421985	-1.33651	0.181382	0.77438	0.468519	0.408057	1.14817	0.250899	0.478903	LRRC59
ENSG00000144290	-3.61466	1.03417	-3.49524	0.000473637	0.0110038	0.118511	0.995845	0.119006	0.905271	0.991758	-3.44549	0.923495	-3.73093	0.000190774	0.00272762	SLC4A10
ENSG00000143476	2.47912	0.709652	3.49343	0.000476865	0.0110557	0.470278	0.932884	0.504112	0.614183	0.956567	2.99264	0.901938	3.31801	0.000906626	0.00877967	DTL
ENSG00000244405	1.68325	0.48207	3.4917	0.000479953	0.011114	-1.11191	0.703358	-1.58086	0.11391	0.688425	0.622017	0.629613	0.987935	0.323184	0.55578	ETV5
ENSG00000287609	-2.87584	0.823802	-3.49094	0.000481319	0.0111324	1.87092	0.973435	1.92198	0.0546088	0.57312	-0.972712	1.12804	-0.862304	0.38852	NaN	AL589787.2
ENSG00000181418	-4.39714	1.25975	-3.49049	0.000482129	0.0111378	-0.573345	1.70668	-0.335941	0.736915	0.976906	-4.92345	0.985198	-4.99742	NaN	NaN	DDN
ENSG00000251079	-1.55311	0.445197	-3.4886	0.000485554	0.0111903	0.169023	0.47314	0.357237	0.720915	0.973495	-1.3416	0.479996	-2.79502	0.00518969	0.0317867	BMS1P2
ENSG00000196972	-3.20366	0.918312	-3.48864	0.000485482	0.0111903	-0.367931	0.892497	-0.412249	0.680157	0.967505	-3.52263	0.82661	-4.26154	2.03022e-05	0.000465345	SMIM10L2B
ENSG00000186417	-2.83074	0.811639	-3.48769	0.00048722	0.0112153	2.44143	0.767962	3.1791	0.00147734	0.102944	-0.359322	0.681085	-0.527573	0.597796	0.778552	GLDN
ENSG00000174951	-3.65938	1.04941	-3.48706	0.000488354	0.0112274	0.458897	0.886997	0.51736	0.604905	0.955868	-3.15953	0.977894	-3.23095	0.00123378	0.0110107	FUT1
ENSG00000123240	-1.91006	0.547802	-3.48676	0.000488904	0.0112274	-0.172506	0.500062	-0.344968	0.730118	0.975436	-2.03521	0.557374	-3.65142	0.000260792	0.00344527	OPTN
ENSG00000101361	0.807034	0.23149	3.48626	0.000489822	0.0112352	-0.00191111	0.320042	-0.00597143	0.995236	0.999574	0.849009	0.254359	3.33784	0.000844326	0.00829408	NOP56
ENSG00000287900	-4.25098	1.21961	-3.48553	0.000491159	0.0112392	0.0388598	1.09291	0.0355563	0.971636	0.997418	-4.22572	1.47992	-2.85537	NaN	NaN	AC061961.1
ENSG00000101464	1.1195	0.321165	3.48575	0.000490765	0.0112392	-0.40217	0.401037	-1.00282	0.315946	0.867382	0.766046	0.367166	2.08638	0.0369444	0.132492	PIGU
ENSG00000253642	-5.86979	1.68578	-3.48194	0.000497798	0.0113777	3.51954	1.37467	2.56028	0.0104588	0.296462	-2.28173	2.04211	-1.11734	0.26385	NaN	AF279873.3
ENSG00000234807	-1.88285	0.540932	-3.48075	0.000500014	0.0113881	1.25131	0.663381	1.88626	0.0592603	0.589634	-0.608674	0.757419	-0.803616	0.421619	0.64877	LINC01135
ENSG00000233828	3.34806	0.961721	3.48132	0.000498955	0.0113881	1.17145	0.975512	1.20086	0.229807	0.820644	4.55168	1.10757	4.10961	3.96331e-05	0.000795827	LINC01949
ENSG00000151692	-0.922155	0.26491	-3.48101	0.000499521	0.0113881	-0.256898	0.338563	-0.758789	0.447979	0.916837	-1.13418	0.278113	-4.07811	4.54026e-05	0.000885629	RNF144A
ENSG00000286364	-3.53687	1.01628	-3.4802	0.000501046	0.0113982	-1.95874	0.680567	-2.8781	0.00400077	0.177426	-5.47321	0.969914	-5.64299	1.67127e-08	1.51412e-06	AL512308.1
ENSG00000287225	-4.53488	1.30319	-3.47984	0.000501713	0.0114	-0.144751	0.829165	-0.174575	0.861414	0.990159	-4.67221	1.24593	-3.74998	0.000176845	0.00258454	Z84468.2
ENSG00000276600	1.91153	0.549473	3.47885	0.000503571	0.0114288	0.722693	0.685003	1.05502	0.291415	0.854351	2.677	0.598408	4.47353	7.69374e-06	0.000213811	RAB7B
ENSG00000150551	1.46567	0.421381	3.47825	0.000504701	0.0114411	-1.80653	0.719104	-2.51219	0.0119983	0.316769	-0.290122	0.753948	-0.384804	0.700383	0.845126	LYPD1
ENSG00000143340	-4.67738	1.34489	-3.4779	0.000505363	0.0114427	0.984371	1.00399	0.98046	0.326859	0.87092	-3.67644	1.56337	-2.35161	0.0186925	NaN	FAM163A
ENSG00000141510	1.67831	0.48284	3.4759	0.000509137	0.0115147	-0.867129	0.705245	-1.22954	0.218868	0.808188	0.851705	0.604061	1.40996	0.15855	0.357287	TP53
ENSG00000274642	-3.1485	0.90618	-3.47447	0.000511857	0.0115572	1.35354	0.64266	2.10616	0.0351908	0.509052	-1.75289	1.08898	-1.60965	0.107474	0.275879	AC244669.2
ENSG00000105711	-2.90804	0.837017	-3.47429	0.000512208	0.0115572	0.0013916	0.900782	0.00154488	0.998767	0.999836	-2.85164	0.606514	-4.70169	2.58017e-06	9.21916e-05	SCN1B
ENSG00000163075	-1.67808	0.483169	-3.47308	0.000514523	0.0115959	0.287675	0.500987	0.574217	0.565821	0.947219	-1.34956	0.64004	-2.10855	0.0349834	0.127671	CFAP221
ENSG00000073670	-2.87415	0.828871	-3.46755	0.000525221	0.0118107	-0.170832	0.919599	-0.185768	0.852627	0.98813	-2.99326	0.698233	-4.2869	1.81181e-05	0.000422373	ADAM11
ENSG00000215374	-1.19665	0.345102	-3.46753	0.000525274	0.0118107	1.04127	0.534363	1.94862	0.0513414	0.564529	-0.124508	0.561156	-0.221878	0.824409	0.915499	FAM66B
ENSG00000105559	2.25181	0.649554	3.4667	0.00052688	0.0118331	2.42821	0.697407	3.48176	0.000498127	0.0519193	4.7207	0.564282	8.36586	5.96795e-17	4.96015e-14	PLEKHA4
ENSG00000105643	-1.94706	0.561866	-3.46534	0.000529562	0.0118796	0.656778	0.654157	1.00401	0.315376	0.867106	-1.25476	0.512341	-2.44907	0.0143226	0.0676195	ARRDC2
ENSG00000101445	-3.58774	1.03563	-3.46431	0.0005316	0.0119115	0.0722271	0.949838	0.0760416	0.939386	0.994037	-3.46532	0.93678	-3.69918	0.000216295	0.00300268	PPP1R16B
ENSG00000171368	-3.51254	1.01416	-3.46351	0.000533185	0.0119332	0.146712	1.04469	0.140436	0.888316	0.990789	-3.32058	0.689594	-4.81527	1.47e-06	6.03014e-05	TPPP
ENSG00000239264	1.76653	0.510139	3.46283	0.000534524	0.0119494	-0.275976	0.448634	-0.615147	0.538458	0.943157	1.54218	0.567238	2.71876	0.00655277	0.0376165	TXNDC5
ENSG00000066248	-3.09252	0.893231	-3.46218	0.000535821	0.0119646	-0.132521	0.977636	-0.135552	0.892175	0.990938	-3.17536	0.682164	-4.65483	3.24256e-06	0.000109146	NGEF
ENSG00000215217	-3.03784	0.877929	-3.46023	0.000539709	0.0120376	1.64504	0.750549	2.19178	0.0283954	0.468465	-1.36041	1.15355	-1.17933	0.238267	0.46382	C5orf49
ENSG00000236824	-3.67168	1.06163	-3.45852	0.000543149	0.0120965	-0.217585	0.867923	-0.250696	0.802049	0.984287	-3.8378	1.00881	-3.80427	0.000142223	0.00218023	BCYRN1
ENSG00000176142	1.48214	0.428575	3.4583	0.000543601	0.0120965	-0.157602	0.521811	-0.302028	0.762631	0.982196	1.36581	0.36955	3.69588	0.000219126	0.00303099	TMEM39A
ENSG00000179542	-4.46545	1.2925	-3.4549	0.000550493	0.0122358	0.14979	1.11165	0.134746	0.892813	0.990938	-4.26814	1.25212	-3.40875	NaN	NaN	SLITRK4
ENSG00000089157	1.38203	0.400143	3.45383	0.000552692	0.0122707	-0.547853	0.553073	-0.990563	0.321899	0.868824	0.881033	0.473053	1.86244	0.0625413	0.191494	RPLP0
ENSG00000149527	-3.28585	0.951918	-3.45183	0.000556807	0.0123479	-0.0197872	0.897967	-0.0220356	0.98242	0.998985	-3.26741	0.911309	-3.5854	0.000336557	0.00421033	PLCH2
ENSG00000184661	2.58188	0.748399	3.44987	0.000560854	0.0124225	1.0709	0.852822	1.25571	0.209221	0.797823	3.69303	0.824333	4.48002	7.46354e-06	0.000209198	CDCA2
ENSG00000113083	3.74375	1.08528	3.44958	0.000561453	0.0124225	4.97019	1.16625	4.26168	2.02892e-05	0.00672227	8.73973	1.09326	7.99421	1.30411e-15	8.04172e-13	LOX
ENSG00000175352	-3.24335	0.940447	-3.44873	0.000563223	0.0124474	-0.0566088	0.97256	-0.058206	0.953585	0.995354	-3.24772	0.732418	-4.43424	9.2396e-06	0.000246338	NRIP3
ENSG00000145708	-4.66937	1.35442	-3.44751	0.000565777	0.0124701	-0.637262	0.878709	-0.725226	0.468314	0.92574	-5.34587	1.15742	-4.61878	3.86003e-06	0.000123598	CRHBP
ENSG00000214595	-1.2124	0.351695	-3.44732	0.000566178	0.0124701	-0.0724886	0.39936	-0.181512	0.855966	0.988701	-1.24477	0.37446	-3.32417	0.000886822	0.00861845	EML6
ENSG00000121743	4.24505	1.23128	3.44766	0.000565467	0.0124701	2.70295	2.6709	1.012	0.311538	NaN	6.96764	1.55814	4.47178	7.75717e-06	0.000214907	GJA3
ENSG00000165406	-1.26868	0.368062	-3.44692	0.000567019	0.0124744	-0.308006	0.419566	-0.734106	0.462884	0.924505	-1.53027	0.442945	-3.45477	0.000550767	0.00603005	MARCH8
ENSG00000174343	3.05392	0.886291	3.44573	0.000569518	0.0125152	5.38471	1.5321	3.5146	0.000440422	NaN	8.6373	1.53454	5.6286	1.81678e-08	1.63655e-06	CHRNA9
ENSG00000101447	2.25404	0.65426	3.44518	0.000570684	0.0125266	0.610477	0.756976	0.806468	0.419973	0.906315	2.91001	0.720961	4.0363	5.43008e-05	0.00102267	FAM83D
ENSG00000168298	1.48013	0.429693	3.44461	0.000571879	0.0125386	-0.570459	0.562396	-1.01434	0.310422	0.863162	0.960372	0.578862	1.65907	0.0971015	0.258343	HIST1H1E
ENSG00000205488	-6.10469	1.77241	-3.44429	0.000572559	0.0125394	1.55854	1.45666	1.06994	0.284648	0.853195	-4.60668	1.53106	-3.00882	0.00262266	NaN	CALML3-AS1
ENSG00000154258	-2.1521	0.625149	-3.44255	0.000576264	0.0126034	0.549672	0.627163	0.876442	0.38079	0.894829	-1.55486	0.710181	-2.18938	0.0285691	0.111092	ABCA9
ENSG00000165816	-2.52024	0.732137	-3.4423	0.000576784	0.0126034	-0.586489	0.639385	-0.91727	0.359001	0.883766	-3.05195	0.876383	-3.48244	0.000496869	0.00555772	VWA2
ENSG00000249661	-2.55823	0.743607	-3.4403	0.000581078	0.0126829	0.522668	0.704306	0.742103	0.458025	0.922572	-1.9987	0.987302	-2.02441	0.0429281	0.146958	TNRC18P1
ENSG00000140534	2.47115	0.718541	3.43913	0.000583591	0.0127235	1.10298	0.796993	1.38393	0.16638	0.760609	3.61365	0.788496	4.58297	4.58413e-06	0.00014272	TICRR
ENSG00000066044	1.0239	0.297842	3.43775	0.000586578	0.0127742	-0.414675	0.367014	-1.12986	0.258534	0.840032	0.654055	0.346016	1.89024	0.0587256	0.182715	ELAVL1
ENSG00000136379	1.49983	0.436665	3.43474	0.000593132	0.012888	-1.08964	0.471752	-2.30977	0.0209009	0.404906	0.460675	0.462227	0.996643	0.318938	0.55115	ABHD17C
ENSG00000143768	3.16221	0.920623	3.43486	0.000592861	0.012888	1.87782	1.4426	1.30169	0.193022	NaN	5.06197	1.35212	3.74374	0.000181301	0.00263265	LEFTY2
ENSG00000224812	-1.67839	0.48883	-3.43348	0.000595889	0.0129334	-0.121957	0.468519	-0.260304	0.794629	0.983738	-1.75952	0.59013	-2.98157	0.00286774	0.0206244	TMEM72-AS1
ENSG00000169562	-3.57955	1.04272	-3.4329	0.000597163	0.0129465	0.907514	1.02577	0.884717	0.376309	0.892397	-2.61689	0.771878	-3.39029	0.000698186	0.00721824	GJB1
ENSG00000276710	-1.818	0.529711	-3.43206	0.000599014	0.0129675	-0.142921	0.594	-0.240608	0.809859	0.984422	-1.92399	0.627357	-3.06682	0.00216347	0.0166368	CSPG4P10
ENSG00000089902	1.13577	0.33095	3.43186	0.000599466	0.0129675	-0.669224	0.378548	-1.76787	0.0770825	0.63464	0.515447	0.304216	1.69435	0.0901997	0.245936	RCOR1
ENSG00000169851	-2.52648	0.736306	-3.43129	0.000600715	0.01298	-0.871742	0.597999	-1.45777	0.144905	0.737506	-3.34527	0.694549	-4.81646	1.46124e-06	6.00712e-05	PCDH7
ENSG00000288075	-1.67715	0.489022	-3.42959	0.000604492	0.0130181	-0.314119	0.564156	-0.556795	0.577668	0.949006	-1.94639	0.570518	-3.41161	0.000645793	0.00683426	AC108519.1
ENSG00000167968	-2.31925	0.676207	-3.42979	0.000604052	0.0130181	1.65957	0.731528	2.26863	0.0232908	0.428516	-0.628141	0.466494	-1.34652	0.178136	0.384992	DNASE1L2
ENSG00000178235	-2.82047	0.822271	-3.4301	0.000603357	0.0130181	-0.479093	0.670813	-0.714198	0.475105	0.92619	-3.25003	0.84514	-3.84555	0.000120281	0.00191129	SLITRK1
ENSG00000118193	2.41066	0.703043	3.42889	0.00060606	0.0130374	1.16869	0.825689	1.41541	0.156949	0.752241	3.61875	0.766001	4.72421	2.31007e-06	8.44346e-05	KIF14
ENSG00000165124	-1.80362	0.526191	-3.42769	0.000608735	0.0130774	0.358613	0.608573	0.589269	0.555681	0.946089	-1.40615	0.674103	-2.08596	0.0369821	0.132524	SVEP1
ENSG00000265763	-3.53089	1.03018	-3.42745	0.00060927	0.0130774	-0.511619	0.622631	-0.821705	0.411245	0.903607	-3.99506	1.0476	-3.81355	0.000136985	0.0021169	ZNF488
ENSG00000135862	1.77033	0.51658	3.42701	0.000610256	0.013084	0.798672	0.527182	1.51498	0.129777	0.712311	2.60998	0.549934	4.74598	2.07496e-06	7.88569e-05	LAMC1
ENSG00000011304	1.47868	0.431528	3.4266	0.000611183	0.0130894	0.163033	0.547714	0.297661	0.765962	0.982232	1.68463	0.478486	3.52074	0.000430339	0.00500768	PTBP1
ENSG00000196876	-2.12929	0.621457	-3.42629	0.000611879	0.0130899	-0.273332	0.704482	-0.387991	0.698023	0.971293	-2.35163	0.4944	-4.75654	1.96944e-06	7.575e-05	SCN8A
ENSG00000169684	2.45762	0.71746	3.42544	0.000613799	0.0131165	-1.62904	1.21324	-1.34272	0.179362	NaN	0.923627	0.972506	0.949739	0.342245	0.575354	CHRNA5
ENSG00000111077	-1.12043	0.327143	-3.42491	0.000615011	0.0131279	0.154769	0.39892	0.38797	0.698038	0.971293	-0.918627	0.409051	-2.24575	0.02472	0.10018	TNS2
ENSG00000108509	-1.38821	0.405492	-3.42352	0.000618167	0.0131663	-0.121815	0.548068	-0.222263	0.824109	0.984811	-1.46664	0.504308	-2.90822	0.00363494	0.0244323	CAMTA2
ENSG00000211829	4.22646	1.23449	3.42364	0.000617873	0.0131663	2.28219	2.15532	1.05886	0.289663	NaN	6.58302	1.78116	3.69591	0.000219098	0.00303099	TRDC
ENSG00000198780	-1.5789	0.461391	-3.42204	0.000621528	0.0132233	-0.405569	0.485493	-0.835375	0.403506	0.90265	-1.93186	0.384868	-5.01954	5.17955e-07	2.647e-05	FAM169A
ENSG00000170681	-2.00486	0.586145	-3.42041	0.000625257	0.0132735	1.00733	0.604308	1.66692	0.0955311	0.666663	-0.965674	0.631387	-1.52945	0.126153	0.307595	CAVIN4
ENSG00000148053	-1.53348	0.448313	-3.42057	0.000624908	0.0132735	-0.914253	0.429298	-2.12964	0.0332009	0.499543	-2.39674	0.492636	-4.86513	1.14384e-06	4.86983e-05	NTRK2
ENSG00000237949	-2.74736	0.803552	-3.41902	0.000628475	0.0133272	-1.6481	0.691322	-2.38398	0.0171265	0.376313	-4.33131	0.93056	-4.65452	3.24738e-06	0.000109146	LINC00844
ENSG00000165757	-2.71985	0.795775	-3.41787	0.000631136	0.013369	-0.679774	0.702085	-0.968221	0.332934	0.874454	-3.34234	0.694825	-4.81033	1.50683e-06	6.11562e-05	JCAD
ENSG00000187135	-3.3483	0.979866	-3.4171	0.000632911	0.013392	-0.208739	0.733744	-0.284485	0.776039	0.982232	-3.5084	0.983331	-3.56788	0.000359887	0.0043903	VSTM2B
ENSG00000217555	1.73635	0.50825	3.41634	0.000634701	0.0134069	-0.24559	0.596774	-0.411529	0.680685	0.967505	1.53835	0.540672	2.84525	0.00443766	0.0284696	CKLF
ENSG00000101049	-2.18375	0.639231	-3.41621	0.000635	0.0134069	1.29782	0.675166	1.92222	0.054578	0.57312	-0.857031	0.641061	-1.33689	0.181257	0.389377	SGK2
ENSG00000122359	-2.07438	0.607497	-3.41464	0.000638669	0.0134571	0.214129	0.660499	0.324192	0.745792	0.977778	-1.80438	0.595125	-3.03193	0.00242997	0.0182019	ANXA11
ENSG00000197847	-3.11482	0.912206	-3.4146	0.000638764	0.0134571	3.08989	1.04579	2.95459	0.00313081	0.156781	-0.0054071	1.01771	-0.00531301	0.995761	NaN	SLC22A20P
ENSG00000228544	-1.66982	0.489483	-3.41139	0.000646319	0.0136015	0.614043	0.517787	1.1859	0.235663	0.823626	-1.02173	0.481003	-2.12417	0.0336557	0.124324	CCDC183-AS1
ENSG00000279712	-4.96538	1.4558	-3.41075	0.000647842	0.0136187	0.809686	1.18437	0.683644	0.4942	0.930954	-4.136	1.35621	-3.04967	0.00229097	0.0173924	FP325330.3
ENSG00000200488	1.62918	0.477715	3.41036	0.00064877	0.0136235	-0.341019	0.519883	-0.655952	0.511855	0.937754	1.3351	0.553706	2.41121	0.0158996	0.0733438	RN7SKP203
ENSG00000247121	-1.79931	0.527682	-3.40984	0.000650021	0.013635	-0.202596	0.488794	-0.414481	0.678522	0.967429	-1.95604	0.575855	-3.39676	0.000681888	0.00711905	AC009126.1
ENSG00000216937	-2.20508	0.646989	-3.40822	0.000653872	0.0137009	0.338445	0.507616	0.666735	0.504942	0.933749	-1.82153	0.653365	-2.78792	0.00530484	0.0322338	CCDC7
ENSG00000285684	3.6959	1.08465	3.40747	0.00065567	0.013722	2.81024	1.10044	2.55374	0.0106573	NaN	6.55968	1.34907	4.86237	1.15987e-06	4.92713e-05	AL137781.1
ENSG00000150051	-3.57081	1.04801	-3.40722	0.000656293	0.013722	-1.8288	0.909597	-2.01056	0.0443714	0.545456	-5.35102	0.854266	-6.26387	3.75529e-10	5.65245e-08	MKX
ENSG00000198824	1.0548	0.309757	3.40525	0.000661044	0.0138048	-0.552466	0.380407	-1.4523	0.146417	0.739841	0.551922	0.294819	1.87207	0.0611965	0.188409	CHAMP1
ENSG00000155849	-1.62489	0.477244	-3.40473	0.000662296	0.0138048	-0.117016	0.462275	-0.253132	0.800167	0.984287	-1.69613	0.502549	-3.37505	0.000738031	0.0075143	ELMO1
ENSG00000189221	-1.73618	0.509938	-3.40469	0.000662392	0.0138048	-1.59443	0.685955	-2.3244	0.0201043	0.399777	-3.27548	0.680785	-4.81133	1.49927e-06	6.09789e-05	MAOA
ENSG00000150672	-2.58168	0.759061	-3.40114	0.000671045	0.0139627	0.227862	0.717196	0.317713	0.750703	0.978956	-2.31079	0.838781	-2.75494	0.00587029	0.0346739	DLG2
ENSG00000159579	1.14958	0.338014	3.401	0.000671409	0.0139627	-0.598255	0.414465	-1.44344	0.148897	0.74204	0.597068	0.412978	1.44576	0.148244	0.342126	RSPRY1
ENSG00000164434	2.57966	0.758586	3.40062	0.000672336	0.013967	0.0241615	0.759473	0.0318136	0.974621	0.997418	2.66287	0.561751	4.74031	2.13391e-06	8.06833e-05	FABP7
ENSG00000105143	-3.61379	1.06286	-3.40006	0.000673712	0.0139806	-0.466325	0.63875	-0.730059	0.465354	0.925346	-4.07839	1.07193	-3.80472	0.000141966	0.00217933	SLC1A6
ENSG00000237649	2.24536	0.660474	3.39962	0.00067479	0.013988	0.703516	0.879189	0.800188	0.423602	0.908296	2.98615	0.790772	3.77625	0.000159205	0.00238773	KIFC1
ENSG00000133460	-1.18256	0.347911	-3.39903	0.000676263	0.0140036	0.195439	0.430723	0.453746	0.650012	0.964326	-0.941032	0.371729	-2.5315	0.0113577	0.0564386	SLC2A11
ENSG00000215788	-1.83014	0.538533	-3.39838	0.000677857	0.0140216	0.645457	0.774576	0.833303	0.404674	0.902897	-1.15056	0.814228	-1.41306	0.157637	0.356067	TNFRSF25
ENSG00000086666	1.04049	0.306294	3.39703	0.000681218	0.0140761	-0.593974	0.391769	-1.51614	0.129485	0.711298	0.491867	0.380316	1.29331	0.195904	0.409458	ZFAND6
ENSG00000275340	-3.30004	0.972519	-3.39329	0.000690588	0.0142545	0.0445045	0.844838	0.0526782	0.957988	0.995876	-3.20664	1.1308	-2.83573	0.00457211	0.0290446	FGD5P1
ENSG00000241163	-2.26164	0.666598	-3.39281	0.000691799	0.0142643	1.64383	0.725786	2.2649	0.0235191	0.428516	-0.588345	0.71046	-0.828118	0.407604	0.636689	LINC00877
ENSG00000118307	-2.28892	0.674978	-3.3911	0.000696122	0.014323	1.24489	0.686684	1.8129	0.0698471	0.621961	-1.00621	0.566876	-1.77501	0.0758964	0.218664	CASC1
ENSG00000204622	2.41891	0.713295	3.39118	0.000695914	0.014323	0.166382	0.759683	0.219015	0.826638	0.985059	2.64514	0.893556	2.96024	0.00307395	0.0217331	HLA-J
ENSG00000084623	1.13202	0.334067	3.3886	0.000702493	0.0144387	-0.205448	0.358692	-0.572771	0.5668	0.947219	0.969758	0.342832	2.82867	0.00467424	0.0294602	EIF3I
ENSG00000186642	-3.29126	0.97174	-3.38698	0.00070667	0.0145092	-0.560936	0.971746	-0.577245	0.563774	0.946894	-3.80024	0.819465	-4.63746	3.52713e-06	0.000116143	PDE2A
ENSG00000109906	-1.84631	0.545491	-3.38468	0.000712609	0.0146157	0.824663	0.443797	1.8582	0.0631407	0.602519	-0.987787	0.570099	-1.73266	0.0831563	0.232162	ZBTB16
ENSG00000126453	1.80636	0.53394	3.38308	0.000716786	0.0146858	1.77727	0.751649	2.3645	0.0180545	0.381931	3.63677	0.566914	6.41502	1.40803e-10	2.51551e-08	BCL2L12
ENSG00000242600	-3.17458	0.938582	-3.38231	0.000718788	0.0147113	1.51334	0.696459	2.17291	0.0297868	0.479579	-1.61155	1.42234	-1.13302	0.257205	NaN	MBL1P
ENSG00000159842	-1.375	0.406735	-3.38058	0.000723337	0.0147732	-0.0345927	0.433514	-0.0797961	0.936399	0.994037	-1.36651	0.408527	-3.34498	0.00082289	0.00814201	ABR
ENSG00000125398	1.40734	0.416273	3.38082	0.000722697	0.0147732	-0.162966	0.522104	-0.312133	0.754939	0.980534	1.29157	0.533634	2.42033	0.0155063	0.0718066	SOX9
ENSG00000145287	3.31468	0.980601	3.38025	0.000724191	0.014775	-0.566128	1.29714	-0.436443	0.662516	NaN	2.85106	1.00677	2.83189	0.00462739	0.0292808	PLAC8
ENSG00000089050	1.38062	0.408491	3.3798	0.000725393	0.014784	-0.87029	0.475833	-1.82898	0.0674023	0.615545	0.559297	0.499426	1.11988	0.262765	0.49149	RBBP9
ENSG00000218582	2.03569	0.602491	3.37879	0.000728065	0.0148228	-1.43787	0.691067	-2.08066	0.0374655	0.516281	0.649173	0.50975	1.27351	0.202836	0.418059	GAPDHP63
ENSG00000135451	2.60763	0.77209	3.37736	0.000731849	0.0148843	1.20185	1.04267	1.15267	0.249045	0.833572	3.84706	1.02763	3.74364	0.000181377	0.00263265	TROAP
ENSG00000102678	-3.47343	1.02863	-3.37675	0.000733469	0.0149016	-0.519553	0.918747	-0.565502	0.571733	0.94808	-3.94703	1.04464	-3.77838	0.000157855	0.0023779	FGF9
ENSG00000144815	-1.53343	0.454191	-3.37619	0.000734978	0.0149166	0.400554	0.486229	0.823797	0.410055	0.903464	-1.08537	0.396488	-2.73746	0.00619157	0.0360801	NXPE3
ENSG00000205726	-1.3048	0.386701	-3.37418	0.000740369	0.0150067	0.109294	0.41933	0.26064	0.79437	0.98355	-1.14889	0.361552	-3.17765	0.00148472	0.0125996	ITSN1
ENSG00000140612	1.07202	0.317734	3.37395	0.000740965	0.0150067	-0.329172	0.465242	-0.707529	0.479238	0.926798	0.790988	0.427732	1.84926	0.0644202	0.195267	SEC11A
ENSG00000227392	-4.42813	1.31266	-3.3734	0.000742472	0.0150215	0.926019	1.09322	0.847055	0.396965	0.899639	-3.51478	1.13791	-3.0888	0.00200965	NaN	HPN-AS1
ENSG00000134910	1.47581	0.437882	3.37034	0.000750749	0.0151731	-0.515363	0.440663	-1.16952	0.242195	0.828682	1.00727	0.511886	1.96777	0.0490947	0.161607	STT3A
ENSG00000261534	-1.45248	0.431149	-3.36886	0.000754794	0.015239	0.124144	0.488296	0.254239	0.799311	0.984287	-1.28227	0.465597	-2.75403	0.00588664	0.0347205	AL596244.1
ENSG00000111206	2.29417	0.681537	3.36617	0.000762191	0.0153723	0.44502	0.862032	0.516245	0.605683	0.955868	2.77843	0.92217	3.01293	0.00258738	0.0191246	FOXM1
ENSG00000161021	0.873367	0.259493	3.36567	0.000763593	0.0153846	-0.320284	0.357704	-0.895388	0.37058	0.890155	0.602134	0.319186	1.88647	0.0592321	0.183722	MAML1
ENSG00000233221	-2.30277	0.684289	-3.3652	0.000764892	0.0153947	1.75642	0.756569	2.32156	0.0202566	0.399777	-0.465583	0.951896	-0.489112	0.624762	NaN	AC133785.1
ENSG00000107829	-1.28822	0.382842	-3.36489	0.00076574	0.0153954	-0.169476	0.401813	-0.421778	0.673187	0.966692	-1.41203	0.397084	-3.55601	0.000376535	0.0045441	FBXW4
ENSG00000276045	1.7258	0.512962	3.36437	0.000767174	0.0153954	-0.318031	0.5529	-0.575205	0.565153	0.947219	1.45293	0.635038	2.28794	0.022141	0.0930417	ORAI1
ENSG00000038382	1.64342	0.488484	3.36433	0.000767307	0.0153954	0.748909	0.399746	1.87346	0.0610046	0.596688	2.43044	0.550064	4.41846	9.94072e-06	0.000261026	TRIO
ENSG00000180801	2.50864	0.746133	3.36219	0.000773272	0.0154782	0.538995	0.688876	0.782426	0.433964	0.912524	3.10077	0.721455	4.29793	1.72397e-05	0.00040736	ARSJ
ENSG00000204130	-1.20672	0.358888	-3.36239	0.0007727	0.0154782	0.189256	0.477324	0.396495	0.69174	0.968795	-0.97716	0.493838	-1.97871	0.0478491	0.158857	RUFY2
ENSG00000075826	-1.90389	0.566299	-3.36199	0.00077383	0.0154782	0.329379	0.578439	0.569426	0.569067	0.948066	-1.53432	0.69893	-2.19524	0.0281463	0.110009	SEC31B
ENSG00000230454	-2.161	0.64307	-3.36044	0.000778191	0.0155494	1.06756	0.713013	1.49726	0.134326	0.721661	-1.0595	0.504496	-2.10012	0.0357185	0.129538	U73166.1
ENSG00000170439	2.79296	0.831396	3.35937	0.000781207	0.0155936	2.85121	0.965608	2.95277	0.00314942	0.156781	5.6828	0.84303	6.74092	1.57383e-11	3.80828e-09	METTL7B
ENSG00000234423	-5.61031	1.67047	-3.35851	0.000783639	0.015626	0.590551	1.35089	0.437158	0.661997	0.966563	-5.33681	1.75212	-3.04592	NaN	NaN	LINC01250
ENSG00000075420	1.03575	0.308594	3.35636	0.000789771	0.0157321	0.581166	0.38097	1.52549	0.127137	0.708113	1.66041	0.323091	5.13913	2.76018e-07	1.64049e-05	FNDC3B
ENSG00000146070	-2.90716	0.866276	-3.35592	0.000791007	0.0157405	0.204601	0.763228	0.268074	0.788643	0.983129	-2.66096	0.794343	-3.34989	0.000808451	0.00804051	PLA2G7
ENSG00000187672	-2.81502	0.839023	-3.35512	0.000793305	0.0157701	-0.337402	0.814983	-0.413998	0.678875	0.967429	-3.1111	0.962775	-3.23139	0.00123189	0.0110042	ERC2
ENSG00000274461	-2.18864	0.652425	-3.35462	0.000794748	0.0157826	0.0863444	0.599057	0.144134	0.885395	0.990789	-2.04937	0.768093	-2.66812	0.00762763	0.0421659	AC023282.1
ENSG00000175471	-2.55332	0.761303	-3.35388	0.000796862	0.0157922	0.234611	0.862968	0.271865	0.785726	0.983129	-2.27027	0.71207	-3.18827	0.00143128	0.0122913	MCTP1
ENSG00000176381	-2.18354	0.651014	-3.35405	0.000796366	0.0157922	-0.15313	0.719702	-0.212768	0.831508	0.985381	-2.28681	0.557526	-4.10171	4.10103e-05	0.00081492	PRR18
ENSG00000277947	3.11948	0.930197	3.35357	0.000797772	0.0157941	0.502358	0.854983	0.587565	0.556824	0.946089	3.65704	0.956064	3.82511	0.000130716	0.00204482	SNORD3D
ENSG00000177679	-2.53931	0.757391	-3.3527	0.000800264	0.0158273	-0.776603	0.650516	-1.19383	0.232546	0.823548	-3.25953	0.715742	-4.55406	5.26206e-06	0.000159413	SRRM3
ENSG00000180139	-3.4296	1.02342	-3.35113	0.000804825	0.0159012	0.46708	0.796678	0.586284	0.557685	0.946089	-2.91874	1.10352	-2.64493	0.00817087	0.0444365	ACTA2-AS1
ENSG00000214575	-2.2515	0.67207	-3.35009	0.000807839	0.0159283	-0.271034	0.632697	-0.428379	0.668375	0.966563	-2.4702	0.564809	-4.37351	1.22267e-05	0.00030713	CPEB1
ENSG00000224924	-3.85881	1.15182	-3.35019	0.000807564	0.0159283	-0.0898374	0.583348	-0.154003	0.877607	0.990789	-3.90096	1.29173	-3.01995	0.00252816	0.0187537	LINC00320
ENSG00000146592	2.59822	0.775693	3.34955	0.000809434	0.0159435	1.29195	0.381985	3.38219	0.000719111	0.0660131	3.92937	0.849874	4.62348	3.77363e-06	0.000121449	CREB5
ENSG00000253973	-4.68452	1.39931	-3.34773	0.000814757	0.0160321	-0.619877	0.9897	-0.626328	0.5311	0.943157	-5.04313	1.32959	-3.79299	0.000148846	0.00225642	AC079296.1
ENSG00000229474	-2.24114	0.669593	-3.34702	0.000816856	0.0160571	1.12732	0.753757	1.4956	0.134758	0.721804	-1.07038	0.76369	-1.40159	0.161037	0.360847	PATL2
ENSG00000068383	-1.74548	0.521668	-3.34597	0.000819958	0.0161017	-0.11489	0.576294	-0.199359	0.841982	0.986557	-1.81147	0.373631	-4.84829	1.24533e-06	5.25513e-05	INPP5A
ENSG00000272549	3.58093	1.07054	3.34497	0.000822929	0.0161281	-1.56175	1.36382	-1.14513	0.252157	NaN	2.05108	1.03538	1.981	0.0475913	0.158321	LINC02538
ENSG00000215475	-3.54608	1.06013	-3.34495	0.000822963	0.0161281	-0.143359	0.949447	-0.150992	0.879982	0.990789	-3.64659	1.10567	-3.29809	0.000973462	0.00925346	SIAH3
ENSG00000126778	1.99229	0.596294	3.34112	0.000834411	0.0163359	0.382883	1.04857	0.365146	0.715002	0.973099	2.41192	1.0008	2.40999	0.015953	0.0735194	SIX1
ENSG00000100767	-1.53718	0.460129	-3.34076	0.000835503	0.0163408	0.33164	0.428557	0.773852	0.439018	0.914766	-1.16311	0.540334	-2.15258	0.0313519	0.118256	PAPLN
ENSG00000163840	1.3118	0.392882	3.33892	0.000841061	0.0164329	0.262003	0.557856	0.46966	0.638598	0.962186	1.62537	0.565018	2.87667	0.00401893	0.02651	DTX3L
ENSG00000227248	-4.10672	1.23018	-3.33829	0.000842947	0.0164532	-0.33186	0.900255	-0.368629	0.712405	0.972443	-4.41485	1.18803	-3.7161	0.00020232	0.00284797	FAM155A-IT1
ENSG00000213793	1.28539	0.385199	3.33694	0.000847076	0.0165171	0.975146	0.719079	1.3561	0.175066	0.769239	2.28701	0.635378	3.59945	0.000318891	0.0040426	ZNF888
ENSG00000120088	-3.44414	1.03226	-3.33652	0.00084834	0.0165252	-0.0897999	1.10314	-0.0814037	0.935121	0.994037	-3.46354	0.749121	-4.62346	3.77384e-06	0.000121449	CRHR1
ENSG00000163808	2.31416	0.693679	3.33607	0.000849721	0.0165354	1.00621	0.590654	1.70356	0.0884636	0.655057	3.35904	0.720632	4.66124	3.14304e-06	0.000106908	KIF15
ENSG00000288033	-2.02306	0.606709	-3.33448	0.000854581	0.0165635	1.4874	0.713563	2.08447	0.0371176	0.516281	-0.500061	0.812255	-0.615646	0.538128	NaN	AC137894.3
ENSG00000134057	1.97778	0.593006	3.33518	0.000852435	0.0165635	0.911615	0.525783	1.73382	0.0829493	0.643608	2.92957	0.612667	4.78167	1.73847e-06	6.83796e-05	CCNB1
ENSG00000151474	-1.47886	0.443495	-3.33456	0.000854352	0.0165635	-0.151975	0.44148	-0.344241	0.730665	0.975436	-1.58995	0.542466	-2.93097	0.00337902	0.023235	FRMD4A
ENSG00000141744	-3.78651	1.13546	-3.33478	0.000853682	0.0165635	1.12755	0.957787	1.17725	0.239096	0.827034	-2.63907	1.3923	-1.89547	0.0580296	0.181405	PNMT
ENSG00000225449	-4.70484	1.41139	-3.33349	0.000857641	0.0166062	-1.47173	0.829803	-1.77359	0.0761304	0.63463	-6.02253	1.11509	-5.40095	6.62883e-08	4.74594e-06	RAB6C-AS1
ENSG00000159131	0.974991	0.292555	3.33268	0.000860129	0.0166377	-0.68958	0.435171	-1.58462	0.113053	0.68835	0.333962	0.396058	0.843214	0.399109	0.629453	GART
ENSG00000006634	1.86666	0.560168	3.33233	0.000861234	0.0166425	0.130074	0.502382	0.258915	0.795701	0.984062	2.03863	0.662478	3.07728	0.00208897	0.0162131	DBF4
ENSG00000276085	-3.03034	0.909586	-3.33156	0.000863599	0.0166463	-0.384459	0.907425	-0.423682	0.671798	0.966563	-3.35799	0.869106	-3.86373	0.00011167	0.00180294	CCL3L1
ENSG00000100982	1.16504	0.349705	3.33149	0.000863813	0.0166463	-0.438687	0.422114	-1.03926	0.298683	0.85683	0.776009	0.381134	2.03605	0.041745	0.144164	PCIF1
ENSG00000173898	-2.50242	0.751154	-3.33143	0.000864009	0.0166463	-0.117988	0.814702	-0.144824	0.88485	0.990789	-2.56844	0.614986	-4.17642	2.96128e-05	0.000631784	SPTBN2
ENSG00000182218	-1.84614	0.554295	-3.33061	0.000866561	0.0166789	0.0294971	0.569647	0.0517814	0.958703	0.995876	-1.76431	0.486524	-3.62635	0.000287451	0.00371278	HHIPL1
ENSG00000107020	1.54968	0.46533	3.33028	0.000867573	0.0166818	-0.897869	0.609049	-1.47421	0.140424	0.729493	0.691536	0.4723	1.46419	0.143143	0.333656	PLGRKT
ENSG00000162490	2.0145	0.605192	3.3287	0.000872509	0.0167435	2.06011	0.642584	3.20598	0.00134603	0.0965473	4.11788	0.644911	6.3852	1.71175e-10	3.002e-08	DRAXIN
ENSG00000015171	-1.422	0.427177	-3.32884	0.000872099	0.0167435	-0.425955	0.439111	-0.97004	0.332027	0.87392	-1.80109	0.363651	-4.95279	7.31557e-07	3.48739e-05	ZMYND11
ENSG00000187690	-2.93164	0.88094	-3.32785	0.000875176	0.0167781	0.515216	0.697387	0.738781	0.46004	0.92331	-2.3933	1.06728	-2.24243	0.0249336	NaN	EZHIP
ENSG00000105642	-2.59063	0.778787	-3.3265	0.000879455	0.0168268	-0.739365	0.649504	-1.13835	0.254973	0.838011	-3.27992	0.699068	-4.69185	2.70745e-06	9.53621e-05	KCNN1
ENSG00000196104	-4.28574	1.28827	-3.32675	0.00087865	0.0168268	0.641713	0.897678	0.714859	0.474696	0.92619	-3.59306	1.28156	-2.80366	0.0050526	0.0311183	SPOCK3
ENSG00000112137	-2.51346	0.756384	-3.323	0.000890546	0.0170223	-0.500014	0.608306	-0.821979	0.411089	0.903492	-2.96252	0.748688	-3.95695	7.59127e-05	0.00133378	PHACTR1
ENSG00000136531	-2.97699	0.896785	-3.31963	0.000901374	0.0172122	-0.0693251	0.859689	-0.0806397	0.935729	0.994037	-2.9954	0.866074	-3.4586	0.000542986	0.00597657	SCN2A
ENSG00000089847	-2.34336	0.706079	-3.31883	0.000903958	0.0172177	-0.03637	0.735381	-0.0494574	0.960555	0.996016	-2.33742	0.753474	-3.1022	0.00192091	0.0152936	ANKRD24
ENSG00000213578	-3.37697	1.01754	-3.31877	0.000904139	0.0172177	-0.913053	0.769413	-1.18669	0.235351	0.823548	-4.2428	1.09095	-3.8891	0.000100615	0.00167103	CPLX3
ENSG00000122012	-3.69062	1.11206	-3.31872	0.000904322	0.0172177	0.0337415	1.07051	0.0315192	0.974855	0.997418	-3.58899	0.839625	-4.27451	1.91555e-05	0.000441709	SV2C
ENSG00000149927	-2.95318	0.890164	-3.31756	0.000908061	0.0172719	-0.0984183	0.856039	-0.114969	0.908469	0.992092	-3.00747	0.845427	-3.55733	0.000374637	0.00452916	DOC2A
ENSG00000247627	-2.4323	0.733474	-3.31613	0.000912728	0.0173436	0.569991	0.587441	0.970294	0.3319	0.87392	-1.81192	0.734232	-2.46778	0.0135953	0.065037	MTND4P12
ENSG00000173546	1.83714	0.554149	3.31525	0.000915603	0.0173721	0.117152	0.632901	0.185103	0.853148	0.98813	2.00269	0.642835	3.1154	0.00183694	0.0147356	CSPG4
ENSG00000225465	-3.52875	1.06444	-3.31513	0.000916021	0.0173721	-0.709397	0.931002	-0.761972	0.446076	0.916837	-4.17988	0.929613	-4.49636	6.91271e-06	0.000196834	RFPL1S
ENSG00000114626	-1.37263	0.414095	-3.31477	0.00091718	0.0173771	0.4644	0.574671	0.808115	0.419025	0.905661	-0.870718	0.588311	-1.48003	0.138865	0.327415	ABTB1
ENSG00000117245	-2.42352	0.731505	-3.31307	0.000922791	0.0174663	0.110992	0.785782	0.141251	0.887672	0.990789	-2.26546	0.78808	-2.87466	0.0040446	0.026615	KIF17
ENSG00000183010	1.3448	0.406106	3.31146	0.000928116	0.0175404	-1.36671	0.684644	-1.99624	0.0459081	0.55236	0.025258	0.630822	0.0400399	0.968061	0.986169	PYCR1
ENSG00000198242	0.933311	0.281853	3.31134	0.000928512	0.0175404	-0.538785	0.39493	-1.36426	0.172487	0.765269	0.444618	0.346351	1.28372	0.19924	0.413762	RPL23A
ENSG00000241764	-2.18261	0.659247	-3.31077	0.0009304	0.0175409	0.431833	0.666986	0.647439	0.517348	0.939343	-1.69862	0.734245	-2.31342	0.0206996	0.088552	AC002467.1
ENSG00000126583	-4.06526	1.22798	-3.31051	0.000931253	0.0175409	-0.395692	1.20714	-0.327794	0.743067	0.977694	-4.4141	1.03299	-4.27312	1.9276e-05	0.000443952	PRKCG
ENSG00000037042	-0.91901	0.277593	-3.31063	0.000930856	0.0175409	-0.243761	0.334762	-0.728164	0.466513	0.925697	-1.11866	0.313074	-3.57314	0.000352729	0.00434176	TUBG2
ENSG00000101266	0.880884	0.266337	3.3074	0.000941673	0.0177027	-0.407366	0.318044	-1.28085	0.200247	0.789936	0.518486	0.289621	1.79022	0.0734182	0.213682	CSNK2A1
ENSG00000073584	1.12804	0.34105	3.30755	0.000941167	0.0177027	-0.0477371	0.446805	-0.106841	0.914915	0.992525	1.12369	0.33971	3.30779	0.000940355	0.00900233	SMARCE1
ENSG00000101255	2.04623	0.618965	3.30589	0.000946753	0.017781	-1.05501	0.594802	-1.77372	0.0761097	0.63463	1.04494	0.692185	1.50963	0.131137	0.315307	TRIB3
ENSG00000164176	-3.34364	1.01165	-3.30514	0.000949297	0.0177862	-0.0665594	0.849517	-0.0783497	0.93755	0.994037	-3.35863	0.925756	-3.62798	0.000285643	0.00370193	EDIL3
ENSG00000052126	-2.34121	0.70843	-3.30478	0.000950495	0.0177862	-0.0377612	0.552899	-0.0682967	0.945549	0.994738	-2.33256	0.817654	-2.85275	0.00433426	0.0279345	PLEKHA5
ENSG00000100504	1.78149	0.538966	3.30537	0.000948496	0.0177862	1.90832	0.602788	3.16583	0.00154644	0.103861	3.71974	0.497144	7.48222	7.30788e-14	3.24878e-11	PYGL
ENSG00000224596	-2.07225	0.627058	-3.30472	0.0009507	0.0177862	-0.0365467	0.803561	-0.0454809	0.963724	0.996873	-2.07858	0.886623	-2.34438	0.0190587	0.0834656	ZMIZ1-AS1
ENSG00000077782	1.56734	0.474426	3.30365	0.000954345	0.0178371	0.0897635	0.516651	0.173741	0.862069	0.990232	1.70161	0.469407	3.62502	0.000288937	0.00372192	FGFR1
ENSG00000162543	-3.14611	0.952681	-3.30238	0.000958675	0.0179008	1.08324	0.899803	1.20387	0.22864	0.820131	-2.02669	1.00203	-2.02258	0.0431161	0.147364	UBXN10
ENSG00000144481	3.765	1.14063	3.3008	0.000964083	0.0179845	0.291232	1.55104	0.187766	0.85106	NaN	4.09494	1.27562	3.21015	0.00132664	0.01164	TRPM8
ENSG00000145907	1.06178	0.321941	3.29806	0.000973542	0.0181435	-0.467019	0.439243	-1.06324	0.287675	0.853948	0.642201	0.421866	1.52229	0.127937	0.310172	G3BP1
ENSG00000183856	2.1427	0.649849	3.29723	0.000976434	0.018176	2.07508	0.713839	2.90693	0.00364998	0.167916	4.26208	0.769185	5.54104	3.00687e-08	2.46692e-06	IQGAP3
ENSG00000147854	0.842164	0.255432	3.29702	0.000977163	0.018176	0.198045	0.351486	0.563452	0.573127	0.94808	1.08387	0.286963	3.77706	0.00015869	0.00238672	UHRF2
ENSG00000114480	1.54154	0.467657	3.29631	0.000979622	0.0182042	0.262509	0.500338	0.524664	0.599817	0.955468	1.8429	0.461115	3.99662	6.42533e-05	0.00117425	GBE1
ENSG00000204314	-2.6185	0.794563	-3.29552	0.000982404	0.0182385	-0.216437	0.868243	-0.249282	0.803143	0.984287	-2.78288	0.588655	-4.72751	2.27285e-06	8.40382e-05	PRRT1
ENSG00000275830	1.69077	0.513243	3.2943	0.000986685	0.0182655	2.32726	0.680578	3.41954	0.000627271	0.0606423	4.06074	0.526592	7.71135	1.24493e-14	6.99941e-12	AL390755.1
ENSG00000036530	-2.53878	0.770576	-3.29465	0.000985445	0.0182655	-0.441812	0.802032	-0.550866	0.581725	0.949322	-2.93125	0.629777	-4.65443	3.24879e-06	0.000109146	CYP46A1
ENSG00000140090	-3.05706	0.927922	-3.29452	0.000985882	0.0182655	-1.30297	0.549297	-2.37208	0.0176885	0.37945	-4.31037	1.01682	-4.23908	2.24437e-05	0.000501794	SLC24A4
ENSG00000010278	1.9916	0.605147	3.2911	0.000997959	0.0183882	-0.609769	0.598198	-1.01934	0.30804	0.8622	1.42698	0.676683	2.10879	0.0349631	0.127622	CD9
ENSG00000231672	-1.98438	0.602959	-3.29107	0.000998058	0.0183882	2.06482	0.62724	3.29191	0.000995099	0.082065	0.108293	0.655963	0.16509	0.868873	0.938446	DIRC3
ENSG00000171766	1.2553	0.381344	3.29179	0.000995529	0.0183882	0.914219	0.510118	1.79217	0.0731051	0.628309	2.21142	0.452049	4.89199	9.98228e-07	4.3968e-05	GATM
ENSG00000136295	1.21307	0.368551	3.29146	0.000996691	0.0183882	-0.1342	0.413745	-0.324354	0.74567	0.977694	1.11857	0.397826	2.81171	0.00492788	0.0306147	TTYH3
ENSG00000166348	-1.50874	0.458388	-3.2914	0.000996895	0.0183882	-0.181777	0.399796	-0.454675	0.649343	0.964326	-1.64228	0.53502	-3.06957	0.00214368	0.0165437	USP54
ENSG00000237493	2.00387	0.609165	3.28953	0.00100353	0.01843	-0.876247	0.811673	-1.07956	0.28034	0.851573	1.17087	0.588795	1.98859	0.0467469	0.156333	AC034102.1
ENSG00000111665	1.88753	0.573701	3.29009	0.00100154	0.01843	1.06546	0.53714	1.98358	0.0473024	0.554713	2.99077	0.603528	4.95547	7.21553e-07	3.45694e-05	CDCA3
ENSG00000213397	-1.07484	0.326781	-3.28917	0.00100482	0.01843	1.257	0.416533	3.01777	0.0025464	0.14077	0.22155	0.370228	0.598413	0.549564	0.746923	HAUS7
ENSG00000231367	-3.90018	1.18579	-3.2891	0.00100508	0.01843	0.908079	1.05053	0.864399	0.387369	0.896914	-2.95284	1.21806	-2.42421	0.0153415	NaN	LINC02613
ENSG00000018408	1.96524	0.597411	3.2896	0.0010033	0.01843	0.974275	0.607404	1.604	0.108715	0.683936	2.97639	0.530487	5.61068	2.01529e-08	1.7809e-06	WWTR1
ENSG00000183960	-2.72999	0.830259	-3.28812	0.00100858	0.0184767	0.557926	0.559497	0.997191	0.318672	0.867382	-2.13362	0.858385	-2.48562	0.0129327	0.0625088	KCNH8
ENSG00000168490	-3.64175	1.10797	-3.28688	0.00101306	0.0185412	-0.0139059	1.03676	-0.0134128	0.989298	0.999574	-3.60326	0.959345	-3.75596	0.000172677	0.00254303	PHYHIP
ENSG00000260231	-1.76336	0.536838	-3.28471	0.00102086	0.0186464	-0.147645	0.628186	-0.235034	0.814183	0.984454	-1.86857	0.609269	-3.06691	0.00216284	0.0166368	KDM7A-DT
ENSG00000155980	-3.21739	0.979572	-3.28448	0.0010217	0.0186464	0.302079	1.0272	0.29408	0.768697	0.982232	-2.85919	0.685954	-4.1682	3.07014e-05	0.000648495	KIF5A
ENSG00000254101	-3.28682	1.00063	-3.28475	0.00102072	0.0186464	1.16615	0.964376	1.20922	0.226577	0.817771	-2.07331	1.01095	-2.05085	0.0402813	NaN	LINC02055
ENSG00000262903	-2.41653	0.73591	-3.28373	0.00102442	0.0186611	2.30971	0.800441	2.88555	0.0039073	0.174928	-0.0728438	0.734124	-0.0992255	0.920959	0.963365	AC027796.4
ENSG00000036672	-1.6835	0.512654	-3.28388	0.00102389	0.0186611	0.275072	0.506291	0.543308	0.586918	0.950592	-1.37029	0.436453	-3.1396	0.00169177	0.0138263	USP2
ENSG00000243708	-1.59896	0.487065	-3.28285	0.00102762	0.0187017	1.04383	0.535966	1.94757	0.0514665	0.564903	-0.520426	0.558918	-0.931131	0.351786	0.584607	PLA2G4B
ENSG00000134013	1.949	0.594084	3.28067	0.0010356	0.0188293	1.19471	0.652295	1.83155	0.067018	0.614368	3.16943	0.500278	6.33534	2.3682e-10	3.9711e-08	LOXL2
ENSG00000277758	-3.54786	1.08173	-3.2798	0.00103879	0.0188696	-1.58313	0.920972	-1.71898	0.0856182	0.647439	-5.08525	0.987124	-5.15158	2.58296e-07	1.55676e-05	FO681492.1
ENSG00000234929	-4.0299	1.22889	-3.2793	0.00104065	0.0188857	-0.291345	1.2081	-0.241159	0.809432	0.984422	-4.28353	1.17028	-3.66026	0.000251957	0.00336812	AC018685.2
ENSG00000169247	-2.76355	0.842894	-3.27864	0.00104308	0.0189121	1.16579	0.87473	1.33275	0.182615	0.775029	-1.5477	0.577925	-2.67803	0.00740572	0.0412734	SH3TC2
ENSG00000184925	-3.88997	1.1868	-3.27768	0.00104662	0.0189585	0.435442	0.658898	0.660864	0.5087	0.935717	-3.40482	1.33062	-2.55882	0.0105028	0.0535248	LCN12
ENSG00000197934	-2.94867	0.899947	-3.27649	0.00105105	0.0190033	1.36365	0.803351	1.69745	0.0896108	0.65833	-1.5396	1.05327	-1.46174	0.143814	NaN	CYYR1-AS1
ENSG00000145198	-3.47514	1.06059	-3.27661	0.0010506	0.0190033	-0.182332	0.995883	-0.183086	0.854731	0.988481	-3.58866	0.895669	-4.00668	6.15793e-05	0.00113406	VWA5B2
ENSG00000256654	-3.5984	1.0984	-3.27604	0.00105275	0.0190162	-0.125854	1.1711	-0.107467	0.914419	0.992525	-3.68578	1.10415	-3.33811	NaN	NaN	AC005906.2
ENSG00000231607	1.13946	0.347898	3.27527	0.00105562	0.0190382	0.729335	0.356645	2.04499	0.0408561	0.528174	1.90921	0.378935	5.03836	4.69547e-07	2.45242e-05	DLEU2
ENSG00000011677	-3.50455	1.07009	-3.27501	0.00105659	0.0190382	-0.735024	0.691018	-1.06368	0.287473	0.853948	-4.18548	1.10891	-3.77441	0.000160388	0.0023987	GABRA3
ENSG00000101298	-2.41569	0.737632	-3.27492	0.00105692	0.0190382	-0.00910496	0.778552	-0.0116947	0.990669	0.999574	-2.37273	0.563347	-4.21185	2.53291e-05	0.000553361	SNPH
ENSG00000159840	1.37747	0.420647	3.27464	0.00105797	0.0190396	0.774933	0.440085	1.76087	0.0782599	0.636565	2.19556	0.370943	5.91886	3.24189e-09	3.62409e-07	ZYX
ENSG00000234810	-3.83228	1.17085	-3.27308	0.00106382	0.019127	0.507831	1.0948	0.463859	0.642749	0.96361	-3.26983	1.19414	-2.73823	0.00617709	NaN	AL603840.1
ENSG00000243753	1.62701	0.497183	3.27245	0.00106618	0.0191517	0.605601	0.506481	1.1957	0.231812	0.822985	2.27637	0.478921	4.75311	2.0031e-06	7.66511e-05	HLA-L
ENSG00000133119	2.17692	0.665346	3.27186	0.00106843	0.0191744	-0.142955	0.656746	-0.217671	0.827685	0.985231	2.07874	0.56765	3.662	0.00025025	0.00335777	RFC3
ENSG00000247317	-2.8195	0.862439	-3.26922	0.00107844	0.0193362	-0.270832	0.843027	-0.321261	0.748012	0.978426	-3.04404	0.916388	-3.32178	0.000894445	0.00868717	LY6E-DT
ENSG00000279058	-2.1798	0.667179	-3.26719	0.0010862	0.0194573	0.599617	1.03735	0.578025	0.563247	0.946564	-1.55289	1.27124	-1.22156	0.221875	0.442615	AGAP14P
ENSG00000111859	1.54451	0.4728	3.26673	0.00108797	0.0194709	0.584026	0.484221	1.20611	0.227774	0.819098	2.16998	0.548281	3.95779	7.56476e-05	0.00133034	NEDD9
ENSG00000168539	-3.60005	1.10249	-3.26539	0.00109313	0.0195093	-0.562608	1.04109	-0.540404	0.588918	0.951359	-4.11101	0.945186	-4.34942	1.36497e-05	0.000335262	CHRM1
ENSG00000288235	-2.0531	0.628713	-3.26555	0.0010925	0.0195093	-0.546704	0.680095	-0.803863	0.421476	0.90772	-2.55889	0.814819	-3.14044	0.00168697	0.0138048	FAM106C
ENSG00000161405	-2.42019	0.741079	-3.26576	0.0010917	0.0195093	1.38233	0.674191	2.05036	0.0403294	0.524962	-0.997165	0.866084	-1.15135	0.249589	0.477209	IKZF3
ENSG00000177674	1.03174	0.316052	3.26447	0.0010967	0.0195545	0.694516	0.467281	1.48629	0.137201	0.724469	1.77238	0.393894	4.49963	6.80714e-06	0.000195383	AGTRAP
ENSG00000095203	-2.46649	0.755623	-3.26418	0.00109782	0.0195545	-0.373672	0.905276	-0.412771	0.679774	0.967491	-2.79344	0.719056	-3.88487	0.000102384	0.00169274	EPB41L4B
ENSG00000164112	-4.60224	1.41002	-3.26395	0.00109869	0.0195545	-0.792224	1.91571	-0.41354	0.679211	0.967465	-5.36089	0.861221	-6.22476	4.82303e-10	6.88037e-08	TMEM155
ENSG00000006016	-3.70372	1.13493	-3.2634	0.00110083	0.0195745	-1.63522	1.07808	-1.51679	0.12932	0.71091	-5.25946	1.06611	-4.93332	8.08451e-07	3.77857e-05	CRLF1
ENSG00000138795	1.65141	0.506119	3.26289	0.00110282	0.0195921	-0.0988263	0.594415	-0.166258	0.867954	0.990467	1.60163	0.570931	2.8053	0.00502704	0.0310422	LEF1
ENSG00000241697	-1.68332	0.515996	-3.26227	0.00110523	0.0196168	-0.498978	0.404041	-1.23497	0.216843	0.807384	-2.13952	0.598415	-3.57531	0.000349808	0.00432104	TMEFF1
ENSG00000105963	-2.83863	0.870386	-3.26134	0.00110886	0.0196633	0.110518	0.809215	0.136575	0.891367	0.990938	-2.68029	0.81576	-3.28563	0.00101753	0.00955262	ADAP1
ENSG00000131269	1.2133	0.372172	3.26004	0.00111395	0.0197354	-0.47939	0.468223	-1.02385	0.305907	0.859925	0.782351	0.451705	1.73199	0.0832746	0.232357	ABCB7
ENSG00000196139	-2.20997	0.678246	-3.25836	0.00112059	0.0197477	-2.50284	0.625742	-3.9998	6.33952e-05	0.0149616	-4.65879	0.816431	-5.70628	1.15472e-08	1.09819e-06	AKR1C3
ENSG00000124155	1.02962	0.315947	3.25884	0.00111867	0.0197477	0.0786822	0.376355	0.209064	0.834399	0.985687	1.15752	0.379138	3.05303	0.00226542	0.0172464	PIGT
ENSG00000184489	1.62885	0.499847	3.2587	0.00111923	0.0197477	-0.0863509	0.443966	-0.194499	0.845785	0.987591	1.58818	0.594601	2.67101	0.00756241	0.0419423	PTP4A3
ENSG00000072041	-4.05043	1.24303	-3.25851	0.00111999	0.0197477	0.110913	1.02766	0.107927	0.914053	0.992525	-3.88261	1.15279	-3.36801	0.000757133	0.00767096	SLC6A15
ENSG00000184905	-2.57971	0.791538	-3.25911	0.00111761	0.0197477	-0.282958	0.633192	-0.446875	0.654965	0.965759	-2.81051	0.799476	-3.51544	0.00043902	0.00506782	TCEAL2
ENSG00000162341	-1.31652	0.404048	-3.25832	0.00112075	0.0197477	0.994335	0.562462	1.76782	0.0770902	0.63464	-0.290923	0.50576	-0.575219	0.565143	0.757879	TPCN2
ENSG00000239389	-2.05861	0.632328	-3.2556	0.00113151	0.0199191	0.4448	0.5877	0.756849	0.44914	0.916894	-1.57712	0.690281	-2.28475	0.0223276	0.0936408	PCDHA13
ENSG00000227733	-1.49363	0.458842	-3.25521	0.00113308	0.0199287	0.605433	0.644516	0.939361	0.347545	0.881525	-0.858677	0.698623	-1.2291	0.219034	0.439448	AC239809.3
ENSG00000125931	2.34035	0.719189	3.25415	0.00113734	0.0199854	0.556821	0.681443	0.81712	0.41386	0.904165	2.93226	0.801197	3.65985	0.000252365	0.00337085	CITED1
ENSG00000260417	-1.50444	0.462565	-3.25239	0.00114438	0.0200371	0.611263	0.738648	0.827542	0.40793	0.903228	-0.855278	0.769479	-1.1115	0.266352	0.495932	AC092127.1
ENSG00000063854	-1.35163	0.41558	-3.25238	0.00114441	0.0200371	-0.101501	0.394916	-0.25702	0.797164	0.984062	-1.406	0.432409	-3.25154	0.00114781	0.0104399	HAGH
ENSG00000204176	-2.3586	0.725185	-3.25241	0.00114431	0.0200371	-0.532383	0.60365	-0.881941	0.377809	0.893403	-2.83853	0.712076	-3.98627	6.71203e-05	0.00121503	SYT15
ENSG00000005379	-1.94199	0.597095	-3.2524	0.00114435	0.0200371	-0.0549939	0.640223	-0.085898	0.931547	0.993673	-1.95334	0.634786	-3.07716	0.00208982	0.0162131	TSPOAP1
ENSG00000158856	-3.11078	0.95665	-3.25174	0.00114702	0.0200645	0.0332565	0.979265	0.0339606	0.972909	0.997418	-3.02636	0.791427	-3.82393	0.000131341	0.00204956	DMTN
ENSG00000112769	1.89765	0.583882	3.25005	0.00115384	0.0201515	-0.167573	0.561372	-0.298506	0.765317	0.982232	1.77695	0.632377	2.80994	0.00495502	0.0307433	LAMA4
ENSG00000111110	-2.8222	0.86837	-3.24999	0.00115407	0.0201515	-0.242793	0.781525	-0.310666	0.756054	0.980534	-3.01133	0.775677	-3.8822	0.000103516	0.00170558	PPM1H
ENSG00000272449	-3.10422	0.955501	-3.24879	0.00115898	0.0201827	-0.514375	0.841988	-0.610905	0.541263	0.943247	-3.58173	1.01877	-3.51573	0.000438547	0.00506542	AL139246.5
ENSG00000183111	-1.69702	0.522275	-3.24929	0.00115694	0.0201827	1.1078	0.517069	2.14247	0.0321559	0.493241	-0.552171	0.470739	-1.17299	0.240801	0.467684	ARHGEF37
ENSG00000135736	1.56959	0.483108	3.24894	0.00115837	0.0201827	-0.00366676	0.601354	-0.00609751	0.995135	0.999574	1.61426	0.567945	2.84228	0.00447917	0.0287026	CCDC102A
ENSG00000158470	1.34118	0.412896	3.24823	0.00116124	0.0202039	-0.0374389	0.391033	-0.0957436	0.923724	0.993516	1.35111	0.43749	3.08831	0.00201295	0.0158222	B4GALT5
ENSG00000104415	2.24324	0.690683	3.24786	0.00116275	0.0202121	1.92673	0.795132	2.42315	0.0153864	0.357622	4.21864	0.793378	5.31731	1.05311e-07	7.06361e-06	CCN4
ENSG00000154265	-1.60712	0.494889	-3.24743	0.00116451	0.0202135	0.883036	0.693315	1.27364	0.20279	0.792485	-0.688042	0.722897	-0.951784	0.341206	0.574187	ABCA5
ENSG00000287306	-2.34355	0.721686	-3.24733	0.00116492	0.0202135	0.324396	0.728623	0.445217	0.656163	0.965991	-1.96393	0.839529	-2.33933	0.0193186	NaN	AC016821.1
ENSG00000178297	-4.02081	1.23872	-3.24595	0.00117061	0.0202941	6.41208	1.33978	4.78593	1.70197e-06	0.00112798	2.40635	1.48612	1.61922	0.1054	NaN	TMPRSS9
ENSG00000230606	-1.47961	0.455987	-3.24484	0.00117515	0.0203183	0.872407	0.666934	1.30809	0.190844	0.780698	-0.578639	0.711365	-0.813421	0.415977	0.643517	AC092683.1
ENSG00000287104	-1.80448	0.556078	-3.24501	0.00117446	0.0203183	-0.0629378	0.521723	-0.120635	0.90398	0.991758	-1.81529	0.55421	-3.27544	0.00105496	0.00978484	AC097382.3
ENSG00000007264	-3.15821	0.973272	-3.24494	0.00117476	0.0203183	-0.0640147	1.01295	-0.0631961	0.94961	0.995005	-3.19052	0.731559	-4.36126	1.29314e-05	0.000321034	MATK
ENSG00000172031	-3.44038	1.06054	-3.24398	0.00117873	0.020362	-0.100659	0.92191	-0.109185	0.913055	0.992295	-3.50061	1.00437	-3.4854	0.00049141	0.00551279	EPHX4
ENSG00000084674	-3.56164	1.09824	-3.24304	0.00118261	0.0203745	1.57746	0.819152	1.92572	0.0541391	0.57312	-1.96459	1.41433	-1.38906	0.164814	NaN	APOB
ENSG00000130222	-1.72883	0.533055	-3.24325	0.00118173	0.0203745	-0.313396	0.714408	-0.438679	0.660894	0.966563	-2.00083	0.681954	-2.93397	0.00334661	0.0230745	GADD45G
ENSG00000139220	-3.14427	0.969395	-3.24354	0.00118053	0.0203745	-0.244996	0.754968	-0.324512	0.745551	0.977694	-3.34785	1.09944	-3.04505	0.0023264	0.0175985	PPFIA2
ENSG00000100336	2.20999	0.681668	3.24203	0.00118682	0.0204256	2.45067	1.03779	2.36144	0.0182039	0.384278	4.72335	1.05812	4.46391	8.04786e-06	0.000220722	APOL4
ENSG00000065809	-2.12864	0.656711	-3.24136	0.00118961	0.0204256	-0.359022	0.677196	-0.53016	0.596001	0.954134	-2.44377	0.647432	-3.77456	0.000160288	0.0023987	FAM107B
ENSG00000143061	1.68785	0.520716	3.24141	0.00118941	0.0204256	-0.0991234	0.441302	-0.224616	0.822278	0.984454	1.63127	0.595949	2.73727	0.00619521	0.0360801	IGSF3
ENSG00000177570	-2.98345	0.920444	-3.24132	0.00118979	0.0204256	0.164039	0.780792	0.210093	0.833595	0.985687	-2.77321	0.978586	-2.8339	0.00459837	0.0291687	SAMD12
ENSG00000259583	-3.37266	1.04062	-3.241	0.00119111	0.0204303	-0.627592	0.92527	-0.678281	0.497594	0.931575	-3.92961	0.831395	-4.72653	2.28391e-06	8.4122e-05	AC015712.2
ENSG00000124783	1.09653	0.338527	3.23913	0.00119894	0.0205462	-0.601076	0.449374	-1.33759	0.181031	0.774297	0.547739	0.424993	1.28882	0.19746	0.411541	SSR1
ENSG00000104147	2.47782	0.765168	3.23827	0.00120256	0.0205901	-0.26753	1.11231	-0.240519	0.809928	NaN	2.25346	0.743407	3.03126	0.00243533	0.0182278	OIP5
ENSG00000006327	2.7971	0.863854	3.23793	0.001204	0.0205965	2.84205	0.890166	3.19272	0.00140941	0.100018	5.67481	0.78767	7.20455	5.8234e-13	2.06148e-10	TNFRSF12A
ENSG00000164627	-3.29561	1.01818	-3.23678	0.00120888	0.0206437	-1.3008	0.762382	-1.70623	0.087965	0.654177	-4.54376	1.11534	-4.07388	4.62362e-05	0.000899137	KIF6
ENSG00000134548	-3.42982	1.05962	-3.23682	0.00120868	0.0206437	-1.94017	0.97724	-1.98535	0.0471052	0.554713	-5.31065	0.8174	-6.49701	8.19321e-11	1.59818e-08	SPX
ENSG00000248429	-2.29062	0.708111	-3.23483	0.00121716	0.0207647	1.66192	0.893603	1.8598	0.0629135	0.601831	-0.612896	0.872289	-0.70263	0.482286	0.696749	FAM198B-AS1
ENSG00000196535	-1.16896	0.361391	-3.2346	0.00121811	0.0207647	0.249285	0.419205	0.59466	0.55207	0.946089	-0.873546	0.304299	-2.87068	0.0040959	0.0268417	MYO18A
ENSG00000133069	-2.30901	0.714023	-3.2338	0.00122155	0.020805	0.141141	0.715614	0.197231	0.843647	0.986985	-2.11157	0.521715	-4.04736	5.17979e-05	0.000981336	TMCC2
ENSG00000167371	-2.20602	0.682913	-3.23031	0.00123658	0.0210425	-0.0408289	0.71889	-0.0567944	0.954709	0.995453	-2.20444	0.728761	-3.02491	0.00248705	0.0185278	PRRT2
ENSG00000197776	-1.17345	0.363506	-3.22815	0.00124594	0.0211734	-0.201168	0.434515	-0.462972	0.643384	0.963873	-1.3285	0.398777	-3.33145	0.000863957	0.0084492	KLHDC1
ENSG00000111912	-2.28116	0.706673	-3.22803	0.00124646	0.0211734	0.148222	0.729116	0.20329	0.838908	0.986361	-2.085	0.719024	-2.89977	0.00373441	0.0249116	NCOA7
ENSG00000201793	1.65246	0.511992	3.22752	0.0012487	0.021193	-0.285806	0.53234	-0.536885	0.591347	0.95188	1.41122	0.617944	2.28373	0.0223873	0.0938498	RN7SKP9
ENSG00000160188	-2.19791	0.681163	-3.2267	0.00125226	0.0212347	0.316891	0.559507	0.566376	0.571139	0.94808	-1.84624	0.760239	-2.4285	0.0151616	0.0704664	RSPH1
ENSG00000154654	-2.04196	0.633156	-3.22505	0.00125949	0.0213015	-0.415105	0.598177	-0.69395	0.487713	0.929179	-2.40496	0.57788	-4.1617	3.15893e-05	0.000662332	NCAM2
ENSG00000250120	-3.01988	0.93632	-3.22527	0.00125854	0.0213015	-0.839557	0.841726	-0.997424	0.318559	0.867382	-3.8269	0.985854	-3.88181	0.000103682	0.00170558	PCDHA10
ENSG00000071539	2.59989	0.80613	3.22515	0.00125906	0.0213015	-0.253487	0.898105	-0.282246	0.777755	0.982232	2.40042	0.605399	3.96501	7.33924e-05	0.00129959	TRIP13
ENSG00000138772	-4.24688	1.31723	-3.22411	0.00126367	0.0213349	0.799845	0.900244	0.888476	0.374285	0.891479	-3.38639	1.45901	-2.32102	0.0202857	NaN	ANXA3
ENSG00000203799	-2.57658	0.799161	-3.22411	0.00126364	0.0213349	1.78096	0.988212	1.80221	0.0715128	0.624505	-0.760554	1.0235	-0.743091	0.457426	0.679066	CCDC162P
ENSG00000255346	-4.24469	1.3168	-3.22348	0.00126641	0.0213626	0.0350178	1.4257	0.0245618	0.980405	0.998458	-4.16547	1.25129	-3.32894	NaN	NaN	NOX5
ENSG00000151364	1.5518	0.481511	3.22277	0.00126958	0.0213788	1.43939	0.72706	1.97974	0.0477327	0.554713	3.02487	0.529412	5.71364	1.10587e-08	1.06766e-06	KCTD14
ENSG00000123119	-3.90059	1.2103	-3.22284	0.00126927	0.0213788	0.046193	1.07119	0.0431231	0.965603	0.996958	-3.80203	1.10811	-3.4311	0.00060113	0.00647027	NECAB1
ENSG00000236901	-1.85435	0.575667	-3.22122	0.00127648	0.0214764	0.188235	0.6396	0.294301	0.768528	0.982232	-1.61961	0.597116	-2.71239	0.00667992	0.038106	MIR600HG
ENSG00000263278	-5.30394	1.64757	-3.21925	0.00128524	0.0215802	0.0808947	1.39294	0.0580749	0.953689	0.995354	-5.22748	1.29548	-4.03517	5.45622e-05	0.00102564	AC233701.1
ENSG00000183876	2.98397	0.926827	3.21956	0.00128388	0.0215802	1.08592	0.771471	1.4076	0.159251	0.754679	4.10751	1.00884	4.07153	4.67057e-05	0.000904024	ARSI
ENSG00000144043	1.05537	0.327848	3.21909	0.00128599	0.0215802	-0.566402	0.457749	-1.23736	0.215952	0.807028	0.535574	0.436534	1.22688	0.219869	0.44035	TEX261
ENSG00000138780	1.43902	0.44719	3.21792	0.00129124	0.0216495	-0.677258	0.367003	-1.84537	0.0649833	0.608769	0.80813	0.49797	1.62285	0.104621	0.271105	GSTCD
ENSG00000213088	-3.02281	0.939565	-3.21724	0.0012943	0.021682	0.463887	0.720136	0.644167	0.519467	0.939498	-2.52778	1.17107	-2.15852	0.0308871	0.117115	ACKR1
ENSG00000134716	-1.59729	0.496713	-3.21573	0.00130115	0.0217052	-0.281001	0.476842	-0.589296	0.555662	0.946089	-1.82562	0.539969	-3.38098	0.000722287	0.00740335	CYP2J2
ENSG00000103089	-3.32368	1.03356	-3.21575	0.00130106	0.0217052	-0.41868	0.871386	-0.480476	0.630889	0.960542	-3.70254	0.960082	-3.85648	0.00011503	0.0018478	FA2H
ENSG00000170276	-2.39347	0.744113	-3.21654	0.00129747	0.0217052	0.501976	0.546955	0.917764	0.358742	0.883633	-1.85276	0.85984	-2.15477	0.0311799	0.117793	HSPB2
ENSG00000102271	1.91765	0.596339	3.2157	0.00130128	0.0217052	0.646893	0.714331	0.905594	0.365151	0.887855	2.60366	0.744865	3.49548	0.000473203	0.00536521	KLHL4
ENSG00000092068	-2.48067	0.771424	-3.21571	0.00130123	0.0217052	0.319178	0.656953	0.485846	0.627076	0.959945	-2.12016	0.742781	-2.85435	0.00431251	0.0278601	SLC7A8
ENSG00000176463	-2.28754	0.711929	-3.21316	0.00131285	0.0218793	0.426335	0.652144	0.653743	0.513278	0.937837	-1.81463	0.607411	-2.98748	0.00281287	0.0203369	SLCO3A1
ENSG00000074695	1.0261	0.319384	3.21274	0.00131475	0.0218921	0.0503004	0.387074	0.12995	0.896606	0.991463	1.12279	0.371365	3.02342	0.00249933	0.018576	LMAN1
ENSG00000186326	-1.84682	0.574928	-3.21226	0.00131695	0.02191	0.66379	0.669632	0.991276	0.321551	0.868639	-1.13546	0.761203	-1.49167	0.135786	0.323208	RGS9BP
ENSG00000153208	-1.14149	0.355444	-3.21144	0.0013207	0.0219536	0.423895	0.406529	1.04272	0.297079	0.856212	-0.667385	0.274684	-2.42964	0.0151137	0.0703466	MERTK
ENSG00000106976	-2.21294	0.689269	-3.21056	0.00132476	0.0220021	0.0582978	0.7793	0.074808	0.940368	0.994037	-2.10656	0.663572	-3.17457	0.00150059	0.0126926	DNM1
ENSG00000198721	1.23005	0.38328	3.20928	0.00133067	0.0220814	-0.505316	0.518111	-0.975306	0.329409	0.871474	0.769053	0.468284	1.64228	0.100532	0.263872	ECI2
ENSG00000184524	-2.19348	0.683538	-3.20901	0.00133191	0.0220831	-0.34376	0.723698	-0.475005	0.634784	0.961978	-2.48692	0.469694	-5.29476	1.19174e-07	7.85563e-06	CEND1
ENSG00000136160	1.59325	0.496708	3.20761	0.00133841	0.0221719	-2.50785	0.705552	-3.55446	0.000378762	0.0459381	-0.859976	0.582782	-1.47564	0.14004	0.329107	EDNRB
ENSG00000122378	-1.84405	0.575008	-3.207	0.00134126	0.0221812	-0.126008	0.634704	-0.198531	0.84263	0.986789	-1.91151	0.606691	-3.15071	0.00162875	0.0134959	PRXL2A
ENSG00000146858	1.54843	0.482815	3.20709	0.00134086	0.0221812	0.608959	0.472059	1.29001	0.197048	0.787563	2.19849	0.531834	4.13378	3.56841e-05	0.000730339	ZC3HAV1L
ENSG00000266709	3.49284	1.08928	3.20656	0.00134331	0.0221961	1.22406	1.16151	1.05385	0.291952	NaN	4.74875	1.20825	3.93027	8.48511e-05	0.00145603	AC005224.3
ENSG00000146670	1.82401	0.568982	3.20574	0.00134716	0.0222169	0.214377	0.524969	0.40836	0.683009	0.96762	2.0836	0.638189	3.26486	0.00109519	0.0100604	CDCA5
ENSG00000105880	-4.60382	1.43617	-3.20563	0.00134766	0.0222169	2.22954	1.27544	1.74806	0.0804539	0.637861	-2.35188	1.497	-1.57106	0.116168	0.291159	DLX5
ENSG00000151322	1.2491	0.389668	3.20556	0.001348	0.0222169	-0.918202	0.509754	-1.80127	0.071661	0.624599	0.386236	0.506915	0.761934	0.4461	0.669044	NPAS3
ENSG00000269609	-1.30514	0.407382	-3.20371	0.00135668	0.0223408	-0.732364	0.376919	-1.94303	0.052013	0.567056	-1.99214	0.413117	-4.82223	1.41965e-06	5.88679e-05	RPARP-AS1
ENSG00000286293	-4.38526	1.36908	-3.20308	0.00135964	0.0223517	-0.110808	0.92477	-0.119822	0.904624	0.991758	-4.49641	1.34817	-3.33519	0.000852416	0.00834858	AP005901.5
ENSG00000203814	1.68735	0.526759	3.20327	0.00135875	0.0223517	-0.126586	0.649992	-0.194749	0.845589	0.987522	1.59784	0.484903	3.29518	0.000983581	0.00932183	HIST2H2BF
ENSG00000231584	-1.90542	0.594986	-3.20246	0.0013626	0.0223813	1.00582	0.563746	1.78418	0.0743945	0.63218	-0.86077	0.621951	-1.38398	0.166364	0.368805	FAHD2CP
ENSG00000081189	-2.28389	0.713222	-3.20221	0.00136376	0.0223813	-0.0141789	0.84419	-0.0167959	0.986599	0.999468	-2.25167	0.723041	-3.11417	0.00184463	0.0147911	MEF2C
ENSG00000139915	-2.7434	0.856848	-3.20173	0.00136606	0.0224001	-1.07018	0.571207	-1.87354	0.0609939	0.596688	-3.76308	0.908759	-4.1409	3.4595e-05	0.000712911	MDGA2
ENSG00000145087	-3.46077	1.081	-3.20146	0.00136731	0.0224017	-0.17387	0.800453	-0.217214	0.828041	0.985231	-3.58777	1.16531	-3.07881	0.00207829	0.0161706	STXBP5L
ENSG00000183775	-3.57724	1.1175	-3.2011	0.00136902	0.0224107	-0.218767	0.992308	-0.220463	0.825511	0.984955	-3.7463	1.08395	-3.45615	0.000547958	0.00600962	KCTD16
ENSG00000128298	-2.03736	0.636653	-3.2001	0.00137379	0.0224528	-0.847128	0.57187	-1.48133	0.138519	0.725856	-2.8346	0.719652	-3.93885	8.18724e-05	0.0014215	BAIAP2L2
ENSG00000144406	-1.65475	0.517097	-3.20008	0.00137391	0.0224528	-0.17216	0.545434	-0.315638	0.752277	0.979796	-1.7824	0.491658	-3.62529	0.000288635	0.00372112	UNC80
ENSG00000275465	-3.27337	1.02332	-3.19878	0.00138008	0.0225348	0.848155	0.880915	0.962812	0.335642	0.875874	-2.39293	1.11384	-2.14835	0.0316859	NaN	AL449403.2
ENSG00000057252	1.283	0.401466	3.19578	0.00139452	0.0227514	-0.547386	0.4725	-1.15849	0.246664	0.832144	0.784559	0.502757	1.56051	0.118639	0.295762	SOAT1
ENSG00000179818	-1.262	0.39505	-3.19454	0.00140055	0.0228304	0.947628	0.467003	2.02917	0.0424408	0.534147	-0.280962	0.414074	-0.678533	0.497434	0.709147	PCBP1-AS1
ENSG00000048540	-2.09202	0.655207	-3.19291	0.00140848	0.0229211	-0.246694	0.73401	-0.336091	0.736802	0.976906	-2.28314	0.497948	-4.58511	4.53754e-06	0.000141963	LMO3
ENSG00000164707	-3.9857	1.24821	-3.19314	0.00140736	0.0229211	4.99204	1.39332	3.58283	0.000339889	0.0427501	0.998589	1.61975	0.616509	0.537559	NaN	SLC13A4
ENSG00000123901	-3.99361	1.25106	-3.19217	0.00141209	0.0229607	1.17557	1.19421	0.984385	0.324926	0.870705	-2.76395	0.993393	-2.78233	0.00539695	0.0326068	GPR83
ENSG00000205704	-2.0176	0.632163	-3.19158	0.00141499	0.0229886	-1.08992	0.621171	-1.75463	0.0793229	0.636944	-3.05406	0.474216	-6.44023	1.1929e-10	2.19265e-08	LINC00634
ENSG00000153976	2.89311	0.906566	3.19129	0.00141641	0.0229923	-0.566533	1.01435	-0.558521	0.576489	0.948819	2.40064	0.619287	3.87646	0.000105988	0.00173762	HS3ST3A1
ENSG00000154252	-2.33417	0.731696	-3.19009	0.00142231	0.0230688	1.0435	0.805682	1.29518	0.195259	0.785117	-1.26258	0.835317	-1.5115	0.13066	NaN	GAL3ST2
ENSG00000172794	-2.7538	0.864116	-3.18685	0.00143832	0.023309	-0.11661	0.823241	-0.141648	0.887358	0.990789	-2.83149	0.667095	-4.24452	2.19065e-05	0.000493825	RAB37
ENSG00000110074	-0.965129	0.30295	-3.18577	0.00144372	0.0233574	0.172532	0.347529	0.496453	0.619575	0.957565	-0.751478	0.350842	-2.14193	0.0321994	0.120496	FOXRED1
ENSG00000177732	0.993386	0.311813	3.18584	0.00144336	0.0233574	-0.691703	0.416285	-1.66161	0.0965912	0.669084	0.350756	0.40642	0.863038	0.388116	0.618992	SOX12
ENSG00000264515	-4.02963	1.26515	-3.18509	0.00144708	0.0233728	0.237793	1.10778	0.214656	0.830035	0.985231	-3.77995	1.77117	-2.13415	0.0328301	0.122272	AC011474.1
ENSG00000151572	-2.77499	0.871224	-3.18516	0.00144672	0.0233728	0.0239708	0.724559	0.0330832	0.973608	0.997418	-2.7043	0.836992	-3.23097	0.0012337	0.0110107	ANO4
ENSG00000101134	1.58544	0.498028	3.18344	0.00145535	0.0234868	-0.729322	0.479294	-1.52166	0.128094	0.70891	0.902568	0.532678	1.6944	0.0901894	0.245936	DOK5
ENSG00000165238	-3.04393	0.95667	-3.18179	0.00146366	0.0236012	0.483443	0.629977	0.767398	0.442845	0.916559	-2.52217	1.11123	-2.26972	0.0232247	0.0962002	WNK2
ENSG00000238795	1.84925	0.58153	3.17997	0.00147289	0.0237302	-0.667359	0.598504	-1.11504	0.264831	0.842576	1.22593	0.619987	1.97735	0.0480023	0.159142	SCARNA12
ENSG00000166851	1.73703	0.546483	3.17856	0.00148008	0.0238264	0.762892	0.478964	1.5928	0.111206	0.686062	2.54064	0.565726	4.49093	7.09127e-06	0.000200231	PLK1
ENSG00000178104	-1.30648	0.411168	-3.17749	0.00148555	0.0238945	-0.124412	0.481283	-0.258501	0.79602	0.984062	-1.38411	0.528205	-2.62041	0.00878243	0.0470266	PDE4DIP
ENSG00000121068	1.8892	0.594854	3.17591	0.00149366	0.0240051	-0.611275	0.564453	-1.08295	0.27883	0.849488	1.32799	0.689413	1.92626	0.0540722	0.173024	TBX2
ENSG00000129255	1.12096	0.353087	3.17474	0.00149971	0.0240823	-0.910697	0.495204	-1.83903	0.0659103	0.610722	0.25602	0.481554	0.531653	0.594966	0.776526	MPDU1
ENSG00000120049	-2.33173	0.734639	-3.17398	0.00150366	0.0241258	-1.2495	0.725539	-1.72217	0.0850388	0.646432	-3.51882	0.594014	-5.9238	3.14578e-09	3.55827e-07	KCNIP2
ENSG00000155380	1.58648	0.500147	3.17203	0.00151379	0.0242682	0.143718	0.587242	0.244734	0.806662	0.984334	1.77351	0.689047	2.57386	0.0100572	0.0517988	SLC16A1
ENSG00000254629	-2.80328	0.884018	-3.17107	0.00151881	0.0242874	0.399842	0.978387	0.408675	0.682779	0.967535	-2.36737	1.3016	-1.81882	0.0689396	NaN	AP002370.1
ENSG00000121644	1.1376	0.35877	3.17084	0.00152	0.0242874	0.0640924	0.465804	0.137595	0.89056	0.990938	1.24886	0.371927	3.3578	0.000785657	0.0078783	DESI2
ENSG00000145335	-3.18123	1.00321	-3.17103	0.00151898	0.0242874	-0.187324	0.986414	-0.189904	0.849384	0.987761	-3.31831	0.940404	-3.5286	0.000417763	0.00489636	SNCA
ENSG00000105732	1.10318	0.34786	3.17134	0.00151737	0.0242874	-0.356366	0.416818	-0.854966	0.39257	0.898741	0.797743	0.315371	2.52954	0.0114213	0.0566354	ZNF574
ENSG00000072042	1.34055	0.422836	3.17037	0.00152246	0.0243007	-0.884052	0.553459	-1.59732	0.110194	0.686062	0.510643	0.526908	0.969133	0.332479	0.565099	RDH11
ENSG00000171729	1.33766	0.421948	3.1702	0.00152334	0.0243007	0.245278	0.521888	0.469982	0.638368	0.962186	1.6268	0.475365	3.42221	0.000621152	0.00663746	TMEM51
ENSG00000116747	0.827551	0.26117	3.16863	0.00153158	0.024392	-0.43618	0.400261	-1.08974	0.275827	0.847353	0.440163	0.353776	1.24418	0.213432	0.432428	RO60
ENSG00000157693	-2.02379	0.638666	-3.16878	0.00153082	0.024392	0.291147	0.732311	0.397572	0.690946	0.968795	-1.68103	0.492751	-3.41151	0.00064603	0.00683426	TMEM268
ENSG00000050405	1.39443	0.440294	3.16705	0.00153993	0.0245048	0.121392	0.502296	0.241674	0.809033	0.984422	1.5544	0.365745	4.24996	2.13804e-05	0.000485207	LIMA1
ENSG00000177238	-3.42714	1.08236	-3.16635	0.00154364	0.0245237	0.826264	1.02877	0.80316	0.421882	0.90772	-2.57476	1.20594	-2.13506	0.0327557	NaN	TRIM72
ENSG00000176105	1.11767	0.352964	3.16654	0.00154266	0.0245237	-0.909066	0.458466	-1.98284	0.0473852	0.554713	0.259183	0.47784	0.542406	0.587539	0.772395	YES1
ENSG00000198856	1.29368	0.408617	3.166	0.00154553	0.0245335	-0.105834	0.471769	-0.224334	0.822497	0.984493	1.23042	0.42843	2.87193	0.00407971	0.0267907	OSTC
ENSG00000140279	-3.37296	1.06563	-3.16524	0.00154956	0.0245775	3.47219	1	3.47218	0.000516257	0.0527109	0.099519	1.44955	0.0686551	0.945264	NaN	DUOX2
ENSG00000138085	1.11007	0.35079	3.16449	0.00155353	0.0245929	-0.512904	0.492466	-1.0415	0.297642	0.856422	0.645437	0.478625	1.34852	0.17749	0.384334	ATRAID
ENSG00000008405	1.14657	0.362343	3.16432	0.00155446	0.0245929	-0.100521	0.476512	-0.210952	0.832925	0.98553	1.09056	0.441989	2.4674	0.01361	0.065091	CRY1
ENSG00000286070	1.97087	0.622884	3.1641	0.00155562	0.0245929	1.28311	0.828278	1.54913	0.121351	0.701062	2.2946	0.955894	2.40048	0.0163736	0.0749157	GGT1
ENSG00000138311	-2.73192	0.863309	-3.16448	0.00155361	0.0245929	0.239516	0.931872	0.257027	0.797158	0.984062	-2.43987	0.679968	-3.58821	0.000332961	0.00418191	ZNF365
ENSG00000235513	-1.73016	0.546977	-3.16313	0.00156081	0.0246199	1.11469	0.618209	1.80309	0.0713738	0.624505	-0.575078	0.514026	-1.11877	0.263237	0.492131	AL035681.1
ENSG00000131379	-2.89683	0.915827	-3.16307	0.00156113	0.0246199	1.79893	0.809314	2.22279	0.0262301	0.451804	-1.06474	1.10683	-0.961977	0.336061	NaN	C3orf20
ENSG00000224577	-3.49798	1.10575	-3.16346	0.00155907	0.0246199	0.396484	0.92821	0.427149	0.669271	0.966563	-3.09248	0.993024	-3.11421	0.00184439	NaN	LINC01117
ENSG00000182318	1.04219	0.329551	3.16245	0.00156445	0.0246522	0.269002	0.413637	0.650332	0.515478	0.938007	1.35462	0.331304	4.08875	4.33706e-05	0.000853834	ZSCAN22
ENSG00000267001	2.04066	0.645476	3.16149	0.00156965	0.0247016	-1.94589	0.756924	-2.57079	0.0101466	0.291745	0.138239	0.619398	0.223183	0.823393	0.91536	AC006538.2
ENSG00000277075	2.08712	0.660252	3.16109	0.00157179	0.0247016	-0.36168	0.59203	-0.610916	0.541255	0.943247	1.77187	0.696949	2.54232	0.011012	0.0552651	HIST1H2AE
ENSG00000197077	-1.18767	0.375682	-3.16136	0.00157033	0.0247016	-0.607268	0.370909	-1.63725	0.101579	0.675303	-1.74505	0.402021	-4.34069	1.42035e-05	0.000344562	KIAA1671
ENSG00000243678	0.923307	0.2921	3.16093	0.00157268	0.0247016	-0.0350892	0.3565	-0.098427	0.921593	0.993215	0.931966	0.323327	2.88243	0.00394623	0.0261206	NME2
ENSG00000123560	-2.70924	0.857184	-3.16063	0.00157428	0.0247067	-0.0427289	0.845812	-0.0505182	0.959709	0.99588	-2.69646	0.754977	-3.57157	0.000354843	0.00434783	PLP1
ENSG00000168781	-1.51275	0.478843	-3.15917	0.00158218	0.0247997	0.381208	0.583485	0.653329	0.513544	0.937837	-1.08992	0.530743	-2.05358	0.0400164	0.14001	PPIP5K1
ENSG00000103269	-1.78423	0.564796	-3.15906	0.00158277	0.0247997	-0.32816	0.544158	-0.603059	0.546469	0.943665	-2.06378	0.5386	-3.83175	0.000127233	0.00200182	RHBDL1
ENSG00000188985	1.46967	0.465552	3.15684	0.00159489	0.0249695	-1.178	0.633932	-1.85825	0.0631337	0.602519	0.349257	0.572237	0.610336	0.541639	0.74137	DHFRP1
ENSG00000112619	-3.2518	1.03031	-3.15615	0.00159865	0.0250081	-0.860239	0.711482	-1.20908	0.226632	0.817771	-4.06717	1.03827	-3.91726	8.95599e-05	0.00151775	PRPH2
ENSG00000285581	-2.64626	0.838651	-3.15538	0.00160291	0.0250344	2.51684	0.846594	2.97291	0.00294995	0.152798	-0.101726	0.998082	-0.101922	0.918819	NaN	AC091196.1
ENSG00000163535	1.79296	0.568209	3.15545	0.00160251	0.0250344	-0.225631	0.60929	-0.370318	0.711146	0.971894	1.61287	0.582521	2.76878	0.00562662	0.0335491	SGO2
ENSG00000213599	-1.44309	0.457506	-3.15426	0.00160904	0.0251098	1.19518	0.368038	3.24743	0.00116451	0.0889476	-0.204319	0.511569	-0.399397	0.689601	0.838789	SLX1A-SULT1A3
ENSG00000220378	-3.37861	1.07125	-3.1539	0.00161103	0.0251115	1.49303	0.979249	1.52467	0.127341	0.708113	-1.86345	0.951349	-1.95874	0.050143	NaN	KRT8P42
ENSG00000284491	2.78561	0.883262	3.15377	0.00161174	0.0251115	-1.2279	1.44865	-0.847622	0.396649	0.899539	1.63269	1.0277	1.58869	0.112131	0.283757	THSD8
ENSG00000113810	1.66159	0.526921	3.15339	0.00161386	0.0251244	1.64298	0.558914	2.93959	0.00328647	0.159633	3.34099	0.444478	7.51665	5.61984e-14	2.68572e-11	SMC4
ENSG00000107736	-2.34515	0.743775	-3.15304	0.00161581	0.0251258	-0.212847	0.712354	-0.298793	0.765098	0.982232	-2.51491	0.777464	-3.23476	0.00121747	0.010892	CDH23
ENSG00000152822	-3.75892	1.19221	-3.1529	0.00161654	0.0251258	-0.532887	1.07058	-0.497757	0.618656	0.957266	-4.24141	1.11143	-3.81617	0.000135538	0.00210305	GRM1
ENSG00000250673	-4.10348	1.30185	-3.15203	0.00162138	0.0251689	1.71566	1.20387	1.42512	0.154123	0.747175	-2.35363	1.39765	-1.68399	0.092183	NaN	REELD1
ENSG00000125895	-1.91771	0.608422	-3.15194	0.00162191	0.0251689	0.118831	0.741214	0.16032	0.872629	0.990467	-1.75774	0.763274	-2.30289	0.021285	0.0903777	TMEM74B
ENSG00000182117	1.44043	0.457156	3.15085	0.00162798	0.0252428	-0.635605	0.411636	-1.5441	0.122565	0.701963	0.854818	0.500003	1.70963	0.0873347	0.240422	NOP10
ENSG00000253230	-3.56688	1.13249	-3.14958	0.00163506	0.0253323	-0.108111	0.949533	-0.113857	0.909351	0.992092	-3.62194	1.10119	-3.28912	0.001005	0.00945917	LINC00599
ENSG00000127824	-3.10171	0.98505	-3.14878	0.00163953	0.025361	-0.219368	0.981874	-0.223418	0.823211	0.984629	-3.25544	0.643823	-5.05643	4.27176e-07	2.29379e-05	TUBA4A
ENSG00000214353	-1.63264	0.518491	-3.14883	0.00163926	0.025361	-0.231083	0.789556	-0.292675	0.769771	0.982232	-1.79823	0.827403	-2.17334	0.0297549	0.114216	VAC14-AS1
ENSG00000166068	1.23748	0.393146	3.14764	0.00164592	0.0254395	-0.371939	0.512285	-0.726041	0.467814	0.92574	0.911611	0.405511	2.24806	0.0245727	0.0997729	SPRED1
ENSG00000074842	1.1823	0.375674	3.14713	0.00164881	0.0254606	-0.00233729	0.344993	-0.0067749	0.994594	0.999574	1.22678	0.414981	2.95624	0.00311413	0.0219182	MYDGF
ENSG00000146143	1.47174	0.467673	3.14694	0.00164991	0.0254606	-0.227296	0.588545	-0.3862	0.699349	0.971313	1.28503	0.417022	3.08145	0.00205994	0.0160812	PRIM2
ENSG00000134247	1.07349	0.341194	3.14626	0.00165371	0.025499	0.365542	0.443882	0.823511	0.410217	0.903464	1.47589	0.408209	3.61552	0.000299747	0.00383789	PTGFRN
ENSG00000101850	-3.41018	1.08407	-3.14572	0.00165677	0.0255258	0.0878311	0.795582	0.110399	0.912093	0.992092	-3.26789	1.15852	-2.82076	0.00479107	0.0300184	GPR143
ENSG00000261606	-3.28081	1.04304	-3.14544	0.00165836	0.02553	1.84438	0.961292	1.91864	0.0550294	0.575665	-1.39607	1.84166	-0.758049	0.448422	NaN	AC091230.1
ENSG00000135968	-0.984134	0.312904	-3.14516	0.00165997	0.0255345	0.311377	0.567913	0.548282	0.583498	0.950135	-0.636181	0.56055	-1.13492	0.256408	0.484869	GCC2
ENSG00000178947	-2.13828	0.679976	-3.14465	0.00166288	0.0255591	-0.546666	0.671903	-0.813608	0.415869	0.904218	-2.63685	0.642844	-4.10186	4.0985e-05	0.00081492	SMIM10L2A
ENSG00000140391	0.855059	0.27193	3.14441	0.00166423	0.0255595	-1.2317	0.472733	-2.60548	0.00917447	0.275489	-0.324114	0.433886	-0.747004	0.455061	0.677383	TSPAN3
ENSG00000182771	-1.16479	0.370468	-3.1441	0.001666	0.0255665	-0.700874	0.382009	-1.83471	0.0665492	0.612032	-1.81498	0.377718	-4.80511	1.54666e-06	6.24654e-05	GRID1
ENSG00000260198	-2.58399	0.822189	-3.14281	0.00167332	0.0256585	0.745991	0.871775	0.855715	0.392155	0.898741	-1.79177	1.10462	-1.62208	0.104787	0.271335	AC009102.1
ENSG00000136237	-2.49503	0.79411	-3.14191	0.00167847	0.0257171	0.302435	0.738519	0.409516	0.682161	0.967535	-2.14219	0.766017	-2.79653	0.00516552	0.0316894	RAPGEF5
ENSG00000100479	2.40283	0.764982	3.14103	0.00168354	0.0257744	0.472858	1.14036	0.414655	0.678394	NaN	2.93582	0.859504	3.41571	0.000636159	0.00674103	POLE2
ENSG00000172172	1.34197	0.427302	3.14057	0.0016862	0.0257764	-0.724513	0.537664	-1.34752	0.177813	0.771541	0.671746	0.559044	1.2016	0.229519	0.452786	MRPL13
ENSG00000148734	-3.92253	1.24903	-3.14045	0.0016869	0.0257764	1.157	0.9783	1.18266	0.236944	0.825221	-2.71143	1.18207	-2.29381	0.0218017	0.0918988	NPFFR1
ENSG00000198252	0.868982	0.276718	3.14032	0.00168766	0.0257764	-0.353958	0.482019	-0.734323	0.462752	0.924395	0.560804	0.437185	1.28276	0.199576	0.4141	STYX
ENSG00000111328	0.866885	0.276117	3.13956	0.00169202	0.0258225	-0.866187	0.512011	-1.69173	0.0906967	0.661452	0.0518807	0.492776	0.105282	0.916152	0.961258	CDK2AP1
ENSG00000173258	-2.21543	0.705767	-3.13904	0.00169504	0.0258484	-0.0738181	0.724325	-0.101913	0.918826	0.992901	-2.23822	0.56376	-3.97016	7.18249e-05	0.00128198	ZNF483
ENSG00000145808	-3.04211	0.969218	-3.13872	0.00169687	0.0258559	0.409749	1.03765	0.394881	0.692931	0.969716	-2.59768	0.673117	-3.85918	0.000113767	0.00183371	ADAMTS19
ENSG00000155660	1.7702	0.564046	3.1384	0.00169874	0.0258641	0.203093	0.580137	0.350077	0.726281	0.974289	2.01657	0.60254	3.34678	0.000817561	0.00810186	PDIA4
ENSG00000279419	-3.11786	0.993601	-3.13795	0.00170137	0.0258837	1.54521	0.938932	1.64571	0.0998244	0.673996	-1.52924	1.1293	-1.35415	0.17569	NaN	AC004925.1
ENSG00000123353	1.21609	0.3876	3.13747	0.00170412	0.0259052	-0.56009	0.524718	-1.06741	0.285786	0.853195	0.704407	0.497072	1.41711	0.15645	0.354559	ORMDL2
ENSG00000184845	-4.21626	1.34422	-3.13657	0.00170934	0.0259501	-0.216969	1.23327	-0.175929	0.86035	0.989629	-4.40231	0.970429	-4.53646	5.72062e-06	0.000170868	DRD1
ENSG00000161243	-2.89632	0.923422	-3.1365	0.00170975	0.0259501	0.439422	0.789424	0.556637	0.577776	0.949006	-2.40335	0.918688	-2.61607	0.00889486	0.0473846	FBXO27
ENSG00000135638	-4.01149	1.27932	-3.13565	0.00171475	0.0260057	-0.16553	1.28234	-0.129085	0.897291	0.991463	-4.15467	0.939735	-4.42111	9.81953e-06	0.000258198	EMX1
ENSG00000205929	1.98449	0.632964	3.13523	0.00171721	0.0260227	0.676666	0.846274	0.799582	0.423953	0.908756	2.70331	0.682548	3.96062	7.47563e-05	0.00131709	C21orf62
ENSG00000130338	-1.87288	0.597458	-3.13475	0.00171998	0.0260443	0.0748858	0.602882	0.124213	0.901147	0.991758	-1.74526	0.543684	-3.21007	0.00132701	0.01164	TULP4
ENSG00000239672	1.25499	0.400609	3.13271	0.00173199	0.0262056	-0.521761	0.461297	-1.13107	0.258024	0.840032	0.789489	0.368563	2.14207	0.0321875	0.120481	NME1
ENSG00000104341	1.40075	0.447295	3.1316	0.00173859	0.026285	-1.06016	0.504821	-2.10006	0.0357234	0.510294	0.3926	0.58562	0.6704	0.502603	0.712393	LAPTM4B
ENSG00000279764	-2.78171	0.889288	-3.12802	0.0017599	0.0264441	0.44453	0.797716	0.557253	0.577354	0.948995	-2.2975	1.2105	-1.89797	0.0577007	0.180791	AC009102.3
ENSG00000234913	-2.27037	0.725758	-3.12827	0.00175838	0.0264441	0.133056	0.792181	0.167961	0.866614	0.990467	-2.09079	0.968396	-2.15903	0.0308482	0.117006	AC016027.2
ENSG00000197299	1.50341	0.480511	3.12877	0.00175541	0.0264441	-1.13441	0.528656	-2.14583	0.0318862	0.491987	0.409938	0.492314	0.832676	0.405027	0.634627	BLM
ENSG00000128254	-2.07173	0.662318	-3.128	0.00176003	0.0264441	0.577502	0.794872	0.726535	0.467511	0.92574	-1.44656	0.918644	-1.57467	0.115333	0.289637	C22orf24
ENSG00000162616	-1.23742	0.395554	-3.12833	0.00175801	0.0264441	0.18324	0.453201	0.404323	0.685975	0.968594	-1.01457	0.512256	-1.9806	0.0476361	0.158401	DNAJB4
ENSG00000248905	-2.0656	0.660033	-3.12954	0.00175082	0.0264441	0.549603	0.731355	0.751486	0.45236	0.918812	-1.47055	0.705854	-2.08337	0.0372178	0.133181	FMN1
ENSG00000234745	2.01619	0.644314	3.12921	0.0017528	0.0264441	0.383095	0.567316	0.675276	0.499501	0.932076	2.45418	0.781859	3.13891	0.00169578	0.0138489	HLA-B
ENSG00000197128	1.04975	0.335528	3.12865	0.00175612	0.0264441	-0.302801	0.402038	-0.753163	0.451352	0.917897	0.78863	0.382426	2.06218	0.039191	0.138332	ZNF772
ENSG00000196218	-2.16794	0.693296	-3.12701	0.00176594	0.0265124	0.792044	0.686853	1.15315	0.248849	0.833572	-1.3305	0.693004	-1.91991	0.0548695	0.174523	RYR1
ENSG00000182621	-1.56042	0.49926	-3.12547	0.00177522	0.0266311	-0.943083	0.528061	-1.78594	0.0741098	0.631741	-2.45311	0.45519	-5.38919	7.0776e-08	5.04833e-06	PLCB1
ENSG00000100346	-3.45978	1.10741	-3.12421	0.00178283	0.0267245	-0.561051	1.04682	-0.535955	0.59199	0.95188	-3.96199	0.888901	-4.45718	8.30451e-06	0.000226784	CACNA1I
ENSG00000187486	-1.48584	0.475934	-3.12196	0.00179654	0.026834	-2.50542	0.735436	-3.40672	0.000657484	0.0626551	-3.9359	0.771475	-5.10178	3.3647e-07	1.93734e-05	KCNJ11
ENSG00000197430	-6.28282	2.01228	-3.12224	0.00179483	0.026834	0.0415036	1.19989	0.0345894	0.972407	0.997418	-6.19431	1.89007	-3.2773	0.00104806	0.00973981	OPALIN
ENSG00000067715	-3.93254	1.25949	-3.12232	0.00179429	0.026834	-0.112441	1.0329	-0.10886	0.913314	0.992326	-3.99537	1.2537	-3.18687	0.00143821	0.0123452	SYT1
ENSG00000148704	-3.58663	1.14887	-3.12187	0.00179706	0.026834	0.133521	1.03319	0.129232	0.897174	0.991463	-3.40485	1.18423	-2.87517	0.00403807	0.026598	VAX1
ENSG00000198554	1.60256	0.513295	3.12211	0.00179563	0.026834	-0.0116122	0.54685	-0.0212347	0.983058	0.998985	1.63253	0.571666	2.85574	0.00429365	0.0278033	WDHD1
ENSG00000110171	-0.943861	0.30256	-3.11958	0.00181109	0.0270227	0.508186	0.402784	1.26168	0.207063	0.796262	-0.392824	0.379976	-1.03381	0.301224	0.532822	TRIM3
ENSG00000188042	1.26328	0.405042	3.11889	0.00181533	0.0270533	0.379552	0.481512	0.78825	0.430551	0.911613	1.68082	0.511751	3.28445	0.0010218	0.0095668	ARL4C
ENSG00000137261	-2.94139	0.943117	-3.11879	0.00181593	0.0270533	0.0920898	0.91834	0.100279	0.920123	0.993215	-2.79785	0.810418	-3.45236	0.000555707	0.0060737	KIAA0319
ENSG00000247157	-1.8706	0.600047	-3.11742	0.00182439	0.0271376	0.456706	0.680215	0.671414	0.501957	0.933262	-1.36532	0.769259	-1.77485	0.0759232	0.218708	LINC01252
ENSG00000127329	-1.62174	0.52021	-3.11748	0.00182407	0.0271376	-0.251317	0.544957	-0.461168	0.644678	0.964326	-1.82258	0.453093	-4.02252	5.75778e-05	0.00107591	PTPRB
ENSG00000089916	0.787849	0.25277	3.11686	0.00182791	0.0271484	-0.324677	0.338212	-0.95998	0.337065	0.877272	0.508086	0.256533	1.98058	0.0476379	0.158401	GPATCH2L
ENSG00000115525	-0.893168	0.286543	-3.11705	0.00182671	0.0271484	0.0363966	0.339817	0.107106	0.914705	0.992525	-0.810767	0.283849	-2.85633	0.00428573	0.0277621	ST3GAL5
ENSG00000275558	1.44272	0.463062	3.11561	0.00183563	0.0272421	-0.389736	0.576859	-0.675617	0.499284	0.932076	1.10273	0.508786	2.16737	0.0302069	0.11551	RN7SKP175
ENSG00000106733	-1.18885	0.381632	-3.11517	0.00183839	0.0272621	1.52193	0.483072	3.15052	0.00162979	0.105551	0.378122	0.492501	0.767758	0.442631	0.666299	NMRK1
ENSG00000244607	-2.32977	0.74801	-3.11463	0.00184177	0.0272914	0.941612	0.674396	1.39623	0.162645	0.758728	-1.34608	0.827764	-1.62617	0.103914	0.270187	CCDC13
ENSG00000175497	-2.99752	0.962549	-3.11415	0.00184475	0.0273147	-0.468239	0.769756	-0.608296	0.542991	0.943634	-3.41102	0.892334	-3.82259	0.000132059	0.00205503	DPP10
ENSG00000006283	-1.77066	0.568657	-3.11376	0.00184719	0.0273299	-0.570172	0.594516	-0.959052	0.337533	0.877317	-2.29353	0.579854	-3.95535	7.64224e-05	0.00134027	CACNA1G
ENSG00000148848	1.95892	0.62925	3.11311	0.00185127	0.0273486	2.17897	0.608761	3.57935	0.000344456	0.0427501	4.1775	0.642718	6.49975	8.04543e-11	1.58553e-08	ADAM12
ENSG00000161960	1.16335	0.373668	3.11332	0.00184997	0.0273486	-0.209404	0.383482	-0.546061	0.585024	0.950592	1.00105	0.447783	2.23557	0.02538	0.102054	EIF4A1
ENSG00000144283	-1.6268	0.522632	-3.11271	0.00185377	0.0273646	-0.0199618	0.527714	-0.0378269	0.969826	0.997319	-1.60143	0.435341	-3.67857	0.000234543	0.00319567	PKP4
ENSG00000108381	-2.24535	0.721722	-3.11111	0.00186386	0.0274718	0.216396	0.556993	0.388507	0.697641	0.971075	-1.97991	0.716874	-2.76187	0.00574716	0.0340801	ASPA
ENSG00000184347	-2.48759	0.799544	-3.11126	0.00186294	0.0274718	-0.184606	0.754518	-0.244668	0.806714	0.984334	-2.62629	0.839607	-3.128	0.00175999	0.0142984	SLIT3
ENSG00000120697	1.07946	0.347	3.11084	0.00186556	0.0274759	-0.334585	0.441118	-0.758492	0.448156	0.916837	0.792948	0.315938	2.50982	0.0120793	0.0591467	ALG5
ENSG00000273597	-2.24625	0.722436	-3.10928	0.00187546	0.0275874	1.167	0.722826	1.61449	0.106421	0.681876	-1.04478	0.795107	-1.31401	0.188841	NaN	AL355377.1
ENSG00000082397	-2.2309	0.717516	-3.1092	0.00187598	0.0275874	0.146226	0.605646	0.241438	0.809215	0.984422	-2.03893	0.778706	-2.61836	0.00883535	0.0471931	EPB41L3
ENSG00000165568	-3.21144	1.03336	-3.10776	0.00188509	0.0277004	1.12143	0.887597	1.26344	0.20643	0.795526	-2.02735	1.22927	-1.64923	0.0990996	0.26162	AKR1E2
ENSG00000139438	-1.6518	0.531581	-3.10734	0.0018878	0.0277192	-0.779885	0.651058	-1.19787	0.230966	0.821559	-2.38525	0.610792	-3.90518	9.41553e-05	0.0015844	FAM222A
ENSG00000214078	1.10261	0.354921	3.10664	0.00189229	0.0277641	0.0065573	0.374599	0.0175049	0.986034	0.999468	1.15034	0.354447	3.24546	0.00117262	0.0106035	CPNE1
ENSG00000198682	1.10733	0.356537	3.1058	0.00189763	0.0278214	-0.731338	0.582123	-1.25633	0.208997	0.797567	0.419046	0.577202	0.725995	0.467842	0.68652	PAPSS2
ENSG00000102805	1.06434	0.342763	3.10517	0.00190171	0.027839	-0.213204	0.467318	-0.45623	0.648224	0.964326	0.897403	0.382558	2.3458	0.0189865	0.0832569	CLN5
ENSG00000179922	1.27098	0.4093	3.10526	0.00190115	0.027839	-0.242469	0.471114	-0.514671	0.606783	0.956144	1.0759	0.440186	2.44419	0.0145179	0.0682046	ZNF784
ENSG00000249042	-1.49182	0.480521	-3.10459	0.00190544	0.0278727	-0.0486704	0.506448	-0.0961014	0.92344	0.993516	-1.49532	0.487283	-3.06869	0.00215	0.016579	AC008771.1
ENSG00000163995	-2.41828	0.779229	-3.10343	0.00191293	0.0279189	0.0897358	0.826382	0.108589	0.913529	0.992326	-2.28132	0.731531	-3.11855	0.00181744	0.0146221	ABLIM2
ENSG00000225194	-1.76899	0.569957	-3.10373	0.001911	0.0279189	1.86586	0.594531	3.13837	0.00169891	0.107932	0.125952	0.779489	0.161583	0.871634	0.939597	LINC00092
ENSG00000133027	1.22099	0.393406	3.10365	0.0019115	0.0279189	-0.982979	0.50057	-1.96372	0.0495626	0.560083	0.288761	0.528473	0.546406	0.584787	0.769995	PEMT
ENSG00000146147	-3.5155	1.13288	-3.10314	0.00191478	0.027925	-0.412106	0.904304	-0.455716	0.648594	0.964326	-3.89327	1.315	-2.96066	NaN	NaN	MLIP
ENSG00000154447	1.02677	0.330932	3.10267	0.00191782	0.0279483	-0.503589	0.395361	-1.27374	0.202754	0.792485	0.568807	0.34957	1.62716	0.103703	0.269822	SH3RF1
ENSG00000166507	-1.18271	0.381247	-3.10221	0.0019208	0.0279706	0.217737	0.442064	0.492547	0.622333	0.958526	-0.921209	0.383751	-2.40054	0.0163711	0.0749157	NDST2
ENSG00000145386	2.0458	0.659615	3.1015	0.0019254	0.0280165	1.4775	0.809808	1.82451	0.0680756	0.617084	3.56053	0.661589	5.38178	7.37542e-08	5.1834e-06	CCNA2
ENSG00000235750	1.28183	0.413539	3.09967	0.00193737	0.0281696	0.962408	0.596696	1.61289	0.106768	0.682432	2.28972	0.470409	4.86752	1.13008e-06	4.84364e-05	KIAA0040
ENSG00000124920	-2.93348	0.946466	-3.09941	0.0019391	0.0281736	1.32459	0.902325	1.46797	0.142112	0.732018	-1.57086	0.811195	-1.93647	0.05281	0.169924	MYRF
ENSG00000143858	-4.17553	1.34764	-3.0984	0.0019457	0.0282484	0.330652	1.27521	0.259291	0.79541	0.984062	-3.77651	0.837839	-4.50744	6.56141e-06	0.000189182	SYT2
ENSG00000237737	-3.96474	1.27993	-3.09763	0.00195077	0.0282566	-0.450653	0.965919	-0.466554	0.640819	0.963286	-4.35619	1.17783	-3.69848	0.000216894	0.00300663	DCTN1-AS1
ENSG00000073350	-2.052	0.662534	-3.0972	0.00195356	0.0282566	1.24062	0.593504	2.09034	0.0365875	0.513592	-0.780069	0.68199	-1.14381	0.252702	0.480518	LLGL2
ENSG00000116981	-3.0766	0.99315	-3.09782	0.00194948	0.0282566	-1.10295	0.622278	-1.77244	0.0763211	0.63463	-4.13458	1.0635	-3.88772	0.000101191	0.00167914	NT5C1A
ENSG00000137819	-2.55415	0.824606	-3.09742	0.00195213	0.0282566	0.52216	0.733896	0.71149	0.476781	0.926578	-1.995	0.824203	-2.42052	0.0154985	0.071788	PAQR5
ENSG00000198832	-1.98193	0.639871	-3.0974	0.00195229	0.0282566	0.689164	0.702606	0.980868	0.326658	0.87092	-1.24189	0.541388	-2.2939	0.0217962	0.091896	SELENOM
ENSG00000227388	-1.72169	0.556089	-3.09607	0.00196105	0.0283226	0.372404	0.737817	0.504738	0.613743	0.956567	-1.33346	0.896253	-1.48782	0.136798	0.324646	AL133410.1
ENSG00000169223	1.27978	0.41334	3.0962	0.00196019	0.0283226	0.0178571	0.449487	0.0397277	0.96831	0.997155	1.34158	0.468959	2.86076	0.00422633	0.0274892	LMAN2
ENSG00000273599	-2.11749	0.684135	-3.09513	0.00196726	0.028349	0.107678	0.538983	0.199781	0.841652	0.986537	-1.95512	0.800346	-2.44284	0.0145722	0.0683421	AL731571.1
ENSG00000060982	1.98529	0.641348	3.0955	0.00196483	0.028349	1.03897	0.570608	1.82082	0.0686348	0.617716	3.07312	0.649801	4.72932	2.25274e-06	8.36099e-05	BCAT1
ENSG00000135677	1.03045	0.33291	3.09528	0.0019663	0.028349	-0.214877	0.441694	-0.486484	0.626624	0.959945	0.861582	0.431282	1.99772	0.0457468	0.154061	GNS
ENSG00000183036	-4.02111	1.29942	-3.09453	0.00197127	0.028362	1.56717	0.952442	1.64542	0.0998825	0.673996	-2.43475	1.49054	-1.63347	0.102371	0.267339	PCP4
ENSG00000188643	1.71471	0.554145	3.09433	0.00197255	0.028362	-0.42487	0.643534	-0.660214	0.509117	0.935802	1.33463	0.619899	2.15298	0.03132	0.118183	S100A16
ENSG00000144285	-1.80643	0.583768	-3.09442	0.00197195	0.028362	0.124756	0.496372	0.251335	0.801555	0.984287	-1.6395	0.672134	-2.43925	0.0147178	0.0688393	SCN1A
ENSG00000168913	-2.36212	0.763548	-3.09362	0.00197734	0.0284097	-0.901246	0.726024	-1.24134	0.214478	0.804307	-3.20222	0.646351	-4.9543	7.25925e-07	3.4692e-05	ENHO
ENSG00000285269	-2.06979	0.66927	-3.0926	0.0019841	0.0284858	2.46434	0.76091	3.23868	0.00120084	0.0903428	0.428078	0.956006	0.447778	0.654314	0.816546	AL160269.1
ENSG00000142227	1.83127	0.592607	3.09019	0.00200031	0.0286852	2.76272	0.629784	4.38678	1.15043e-05	0.00469843	4.62624	0.544783	8.49189	2.03305e-17	1.94319e-14	EMP3
ENSG00000106484	1.80397	0.583792	3.09009	0.00200095	0.0286852	-1.05844	0.548268	-1.93051	0.0535439	0.572261	0.797433	0.640389	1.24523	0.213046	0.431831	MEST
ENSG00000124459	0.94315	0.305259	3.08968	0.00200374	0.028704	0.713185	0.416855	1.71087	0.0871055	0.653112	1.7044	0.372731	4.57273	4.81404e-06	0.000148657	ZNF45
ENSG00000271723	-2.11008	0.683062	-3.08914	0.00200736	0.0287346	0.886024	0.687338	1.28907	0.197375	0.787831	-1.17619	0.703634	-1.6716	0.0946039	0.25393	MROH7-TTC4
ENSG00000236969	3.85683	1.24922	3.0874	0.00201917	0.0288823	2.49835	2.65034	0.942652	0.345859	NaN	6.39139	1.62665	3.92916	8.5242e-05	0.00146093	GGT8P
ENSG00000250377	2.03609	0.660346	3.08337	0.00204673	0.0292549	-0.946245	0.788593	-1.19992	0.230172	0.820965	1.14325	0.712649	1.60422	0.108665	0.277855	AC008525.1
ENSG00000101977	-3.93541	1.27668	-3.08253	0.00205248	0.0293155	-1.01408	0.750449	-1.35129	0.176602	0.770186	-4.92154	1.23629	-3.98091	6.86532e-05	0.00123576	MCF2
ENSG00000197261	2.05348	0.666572	3.08065	0.00206547	0.0294793	0.496025	1.26203	0.393038	0.694292	0.970138	2.58584	1.24395	2.07872	0.0376428	0.1344	C6orf141
ENSG00000161835	-1.979	0.642464	-3.08033	0.00206775	0.0294901	0.0373817	0.737929	0.0506575	0.959598	0.99588	-1.88877	0.557471	-3.38811	0.000703762	0.00726187	GRASP
ENSG00000079950	-1.05539	0.342783	-3.07888	0.00207782	0.0296119	-0.172235	0.379961	-0.453297	0.650335	0.964353	-1.181	0.370051	-3.19145	0.0014156	0.0122005	STX7
ENSG00000099365	-2.49197	0.809461	-3.07855	0.00208007	0.0296223	-0.302322	0.854435	-0.353827	0.723469	0.973789	-2.73681	0.543698	-5.0337	4.81114e-07	2.48567e-05	STX1B
ENSG00000276070	-2.51293	0.816372	-3.07817	0.00208275	0.0296386	-0.942407	0.891388	-1.05724	0.290404	0.853948	-3.39384	0.989755	-3.42897	0.000605881	0.00651041	CCL4L2
ENSG00000189410	-2.99726	0.974032	-3.07716	0.00208981	0.0297173	0.256984	1.11857	0.229742	0.818292	0.984454	-2.6923	0.746469	-3.60672	NaN	NaN	SH2D5
ENSG00000235711	-5.14124	1.67101	-3.07673	0.00209286	0.0297352	-0.0444114	1.34019	-0.033138	0.973565	0.997418	-5.16276	1.33005	-3.88161	0.000103766	0.00170558	ANKRD34C
ENSG00000088899	-1.85538	0.603071	-3.07655	0.00209413	0.0297352	-0.251488	0.659619	-0.381262	0.703009	0.971503	-2.05514	0.462339	-4.4451	8.78492e-06	0.000236858	LZTS3
ENSG00000180155	-2.10853	0.685767	-3.07471	0.00210709	0.0298754	-0.672714	0.660049	-1.01919	0.308114	0.8622	-2.72931	0.591917	-4.61096	4.00804e-06	0.000127484	LYNX1
ENSG00000047597	-3.23358	1.05161	-3.07489	0.0021058	0.0298754	0.0481836	1.03314	0.046638	0.962802	0.996417	-3.13763	0.960587	-3.26636	0.00108939	0.0100264	XK
ENSG00000286749	-5.68259	1.8492	-3.073	0.00211916	0.0300245	0.169265	1.30429	0.129775	0.896744	0.991463	-5.59069	1.36826	-4.08598	4.3892e-05	0.000862322	AC008571.2
ENSG00000172005	-2.87694	0.936376	-3.07242	0.00212333	0.0300446	0.830502	0.832382	0.997741	0.318405	0.867382	-1.99662	0.843893	-2.36597	0.017983	0.0802248	MAL
ENSG00000178199	-1.72123	0.560229	-3.07237	0.00212368	0.0300446	0.595542	0.785207	0.758452	0.44818	0.916837	-1.09244	0.804288	-1.35827	0.174379	0.380544	ZC3H12D
ENSG00000283294	-4.66601	1.5189	-3.07196	0.00212659	0.0300588	0.439899	1.25772	0.349758	0.72652	0.974472	-4.19201	1.65377	-2.53482	NaN	NaN	AP005212.4
ENSG00000100197	-2.36888	0.771171	-3.07179	0.00212778	0.0300588	1.39455	0.937592	1.48737	0.136916	0.724469	-0.951071	1.11491	-0.853047	0.393633	NaN	CYP2D6
ENSG00000250320	-3.83717	1.24953	-3.07089	0.00213423	0.030084	-0.391541	1.11158	-0.352237	0.72466	0.973863	-4.20303	1.11289	-3.7767	0.000158922	0.00238773	AC113383.1
ENSG00000083857	1.21011	0.394021	3.07119	0.00213207	0.030084	-1.52602	0.543376	-2.8084	0.00497884	0.201199	-0.267025	0.575617	-0.463893	0.642724	0.809376	FAT1
ENSG00000165643	-5.09593	1.6594	-3.07094	0.00213388	0.030084	-0.163055	2.1934	-0.0743392	0.940741	0.994037	-5.22003	1.07106	-4.8737	1.09528e-06	4.74769e-05	SOHLH1
ENSG00000136535	-3.88786	1.26635	-3.07012	0.00213971	0.0301395	-0.0802563	1.27632	-0.0628811	0.949861	0.995048	-3.91533	0.839162	-4.66576	3.07473e-06	0.000105334	TBR1
ENSG00000130675	-4.33913	1.41369	-3.06937	0.00214509	0.0301932	1.07339	1.48224	0.724169	0.468962	0.92574	-3.23919	1.55753	-2.07969	0.0375537	NaN	MNX1
ENSG00000101457	0.952316	0.310288	3.06914	0.00214676	0.0301949	-0.435473	0.385406	-1.12991	0.258515	0.840032	0.56417	0.3239	1.7418	0.0815431	0.229097	DNTTIP1
ENSG00000183785	-2.76589	0.901305	-3.06877	0.00214944	0.0302106	0.388616	0.98657	0.393906	0.69365	0.970066	-2.32227	0.617141	-3.76295	0.000167922	0.00249223	TUBA8
ENSG00000198478	-2.50461	0.816242	-3.06846	0.00215162	0.0302193	-0.176037	0.752472	-0.233945	0.815028	0.984454	-2.62485	0.684507	-3.83465	0.000125741	0.00198322	SH3BGRL2
ENSG00000197121	1.34784	0.439301	3.06816	0.00215385	0.0302287	-0.44009	0.536915	-0.819664	0.412408	0.904165	0.951396	0.396075	2.40206	0.016303	0.0746454	PGAP1
ENSG00000135404	1.51455	0.493776	3.06728	0.00216018	0.0302863	0.312492	0.500803	0.623981	0.53264	0.943157	1.88226	0.537805	3.4999	0.000465434	0.00529283	CD63
ENSG00000058335	-3.97084	1.29463	-3.06715	0.00216108	0.0302863	-0.853969	1.03107	-0.828236	0.407537	0.903228	-4.77543	1.09788	-4.34969	1.3633e-05	0.000335262	RASGRF1
ENSG00000134419	1.35692	0.442558	3.0661	0.00216872	0.0303715	-0.89137	0.502586	-1.77357	0.0761347	0.63463	0.519069	0.412257	1.25909	0.207998	0.425035	RPS15A
ENSG00000183684	0.987969	0.322269	3.06567	0.00217184	0.0303932	-0.545183	0.450423	-1.21038	0.226133	0.817258	0.491796	0.429892	1.144	0.252624	0.480514	ALYREF
ENSG00000140600	-3.95221	1.28937	-3.06522	0.00217508	0.0304165	-0.144119	0.992328	-0.145234	0.884526	0.990789	-4.04732	1.24452	-3.25211	0.00114552	0.0104374	SH3GL3
ENSG00000224189	-2.36995	0.773468	-3.06406	0.00218354	0.0304909	1.83734	0.827412	2.22058	0.0263792	0.45197	-0.494184	0.652648	-0.757199	0.448931	0.671741	HAGLR
ENSG00000100196	1.78984	0.584111	3.06422	0.00218242	0.0304909	1.01988	1.0872	0.938075	0.348206	NaN	2.86002	0.928164	3.08137	0.00206048	0.0160812	KDELR3
ENSG00000285077	2.56867	0.838768	3.06243	0.00219549	0.0306131	0.533142	0.849229	0.627796	0.530138	0.943157	3.138	0.845997	3.70923	0.000207891	0.00291566	AC091057.6
ENSG00000008086	-2.42835	0.793003	-3.06222	0.00219703	0.0306131	-0.311816	0.796154	-0.391653	0.695314	0.970341	-2.69032	0.764202	-3.52043	0.000430844	0.00500974	CDKL5
ENSG00000124140	-2.84683	0.929564	-3.06254	0.00219465	0.0306131	-0.345619	0.906206	-0.381391	0.702913	0.971503	-3.13252	0.720659	-4.34675	1.38172e-05	0.00033733	SLC12A5
ENSG00000187840	1.54562	0.504831	3.06165	0.00220119	0.030627	-0.316776	0.710643	-0.445759	0.655771	0.965955	1.2701	0.550295	2.30803	0.0209973	0.0894549	EIF4EBP1
ENSG00000083312	0.791649	0.258565	3.0617	0.00220085	0.030627	-0.252336	0.42264	-0.597047	0.550476	0.945509	0.590218	0.386976	1.5252	0.127208	0.309159	TNPO1
ENSG00000130513	2.62862	0.858662	3.06129	0.00220382	0.0306417	2.25284	0.815883	2.76123	0.00575846	0.216542	4.93891	1.01383	4.87151	1.10747e-06	4.76809e-05	GDF15
ENSG00000258498	-2.68341	0.877304	-3.0587	0.00222303	0.030811	1.47527	0.831498	1.77423	0.0760243	0.63463	-1.18304	1.13981	-1.03793	0.299302	NaN	DIO3OS
ENSG00000204525	1.84123	0.602074	3.05814	0.00222713	0.030811	0.0556983	0.603319	0.0923197	0.926444	0.993516	1.95028	0.767848	2.53993	0.0110873	0.0555266	HLA-C
ENSG00000171435	-3.86493	1.26366	-3.05853	0.00222428	0.030811	-0.530407	0.875038	-0.606153	0.544413	0.943634	-4.34153	1.23851	-3.50543	0.00045587	0.00521509	KSR2
ENSG00000149269	-1.95572	0.63939	-3.05873	0.00222279	0.030811	-0.207014	0.794289	-0.260628	0.79438	0.98355	-2.1148	0.608542	-3.4752	0.000510482	0.00567347	PAK1
ENSG00000164244	0.995647	0.325541	3.05844	0.00222495	0.030811	-0.513702	0.432669	-1.18729	0.235115	0.823548	0.525878	0.401353	1.31026	0.190106	0.401422	PRRC1
ENSG00000130363	-0.917682	0.300071	-3.05822	0.00222657	0.030811	-0.0896864	0.381655	-0.234993	0.814214	0.984454	-0.96032	0.367771	-2.61119	0.00902284	0.047898	RSPH3
ENSG00000145147	-3.58043	1.17036	-3.05925	0.00221896	0.030811	0.222063	1.06299	0.208904	0.834523	0.985687	-3.30578	1.05159	-3.14361	0.00166875	0.0136792	SLIT2
ENSG00000135472	-2.56462	0.838854	-3.05729	0.0022335	0.0308551	-0.571409	0.802698	-0.71186	0.476551	0.926578	-3.07465	0.633088	-4.8566	1.19418e-06	5.06163e-05	FAIM2
ENSG00000253846	-2.49176	0.815007	-3.05734	0.00223308	0.0308551	-0.160832	1.0711	-0.150155	0.880642	0.990789	-2.62554	0.974706	-2.69367	NaN	NaN	PCDHGA10
ENSG00000177697	1.57893	0.516531	3.05681	0.0022371	0.0308803	0.852214	0.54915	1.55188	0.120691	0.70011	2.46837	0.504266	4.89498	9.83144e-07	4.35457e-05	CD151
ENSG00000137073	-1.07863	0.352883	-3.05662	0.00223851	0.0308803	0.0869133	0.403909	0.21518	0.829627	0.985231	-0.951882	0.35613	-2.67285	0.00752095	0.0417573	UBAP2
ENSG00000256982	-3.77138	1.23403	-3.05616	0.00224192	0.0309054	-0.692146	0.911511	-0.75934	0.447649	0.916837	-4.41625	1.17368	-3.76275	0.000168057	0.0024923	AC135782.1
ENSG00000148225	-1.58979	0.520297	-3.05554	0.00224658	0.0309475	0.0892331	0.59768	0.149299	0.881318	0.990789	-1.46033	0.471304	-3.0985	0.00194503	0.0154343	WDR31
ENSG00000162461	-2.06365	0.675886	-3.05325	0.00226378	0.0311623	1.41344	0.721963	1.95777	0.0502566	0.562411	-0.619926	0.823098	-0.753162	0.451353	0.674047	SLC25A34
ENSG00000233393	-2.7344	0.896017	-3.05173	0.00227526	0.0312982	-1.07326	0.70481	-1.52277	0.127817	0.708162	-3.76732	0.945972	-3.98249	6.81978e-05	0.00122872	AP000688.2
ENSG00000103855	1.59459	0.522726	3.05052	0.00228444	0.0314021	0.00102112	0.500358	0.00204078	0.998372	0.99981	1.63766	0.518392	3.15911	0.00158251	0.0132217	CD276
ENSG00000181026	1.73143	0.567765	3.04956	0.00229178	0.0314383	-0.444801	0.628073	-0.708199	0.478822	0.926661	1.33063	0.666089	1.99767	0.0457526	0.154061	AEN
ENSG00000155085	-1.62672	0.533422	-3.04958	0.00229159	0.0314383	0.449039	0.535021	0.839294	0.401305	0.901978	-1.1347	0.484557	-2.34172	0.019195	0.0839083	AK9
ENSG00000141524	-1.66148	0.544829	-3.04954	0.00229194	0.0314383	1.45335	0.627225	2.3171	0.0204982	0.402166	-0.177124	0.413799	-0.428043	0.66862	0.825038	TMC6
ENSG00000204287	1.93045	0.633278	3.04835	0.00230104	0.0315408	0.73396	0.430991	1.70296	0.0885759	0.65541	2.70684	0.683182	3.96211	7.42913e-05	0.0013101	HLA-DRA
ENSG00000116147	-2.00422	0.657588	-3.04784	0.00230495	0.0315722	-1.24762	0.628222	-1.98595	0.0470385	0.554713	-3.2032	0.746973	-4.28824	1.80094e-05	0.000420351	TNR
ENSG00000188157	1.20114	0.394192	3.04709	0.00231067	0.0316058	0.150139	0.40951	0.366632	0.713894	0.972992	1.38811	0.454117	3.05671	0.00223779	0.0170905	AGRN
ENSG00000124193	0.991212	0.325283	3.04723	0.00230964	0.0316058	-0.225371	0.418588	-0.538408	0.590295	0.95188	0.810176	0.391266	2.07066	0.038391	0.136232	SRSF6
ENSG00000273372	-3.68808	1.21072	-3.04617	0.00231774	0.0316577	0.501714	1.02878	0.487678	0.625778	0.959945	-3.14599	1.39563	-2.25417	0.0241858	NaN	SFTPD-AS1
ENSG00000230844	1.45408	0.477327	3.04629	0.00231686	0.0316577	-0.878936	0.605716	-1.45107	0.14676	0.739841	0.619243	0.426294	1.45262	0.146329	0.338993	ZNF674-AS1
ENSG00000160401	-4.18987	1.37567	-3.04571	0.00232135	0.0316847	4.67293	1.43122	3.26499	0.00109469	0.0859498	0.494627	1.6491	0.299938	0.764225	NaN	CFAP157
ENSG00000253676	1.93016	0.63386	3.04509	0.00232612	0.0317275	1.72417	0.932778	1.84842	0.0645411	0.608077	3.6926	0.717159	5.14893	2.61977e-07	1.56989e-05	TAGLN2P1
ENSG00000198822	-3.18198	1.04544	-3.04367	0.00233709	0.0318324	-0.31749	0.98488	-0.322364	0.747177	0.978119	-3.44866	0.938455	-3.67483	0.000238006	0.00322675	GRM3
ENSG00000126790	1.4079	0.462547	3.0438	0.00233614	0.0318324	0.0448871	0.432205	0.103856	0.917284	0.992525	1.49569	0.479656	3.11824	0.00181932	0.0146311	L3HYPDH
ENSG00000136826	-1.7991	0.591157	-3.04335	0.00233961	0.0318444	0.720756	0.584112	1.23393	0.217228	0.807422	-1.02258	0.488603	-2.09287	0.0363609	0.131072	KLF4
ENSG00000231991	2.40745	0.791237	3.04263	0.00234517	0.0318976	2.09097	0.965414	2.16588	0.0303207	0.481953	4.53916	0.78193	5.80508	6.43369e-09	6.61217e-07	ANXA2P2
ENSG00000153266	-3.70532	1.21818	-3.04168	0.00235261	0.0319519	-0.392918	0.74876	-0.524758	0.599751	0.955468	-4.04739	1.15804	-3.49502	0.000474033	0.00536825	FEZF2
ENSG00000102743	1.27427	0.418937	3.04167	0.00235273	0.0319519	-0.684284	0.52622	-1.30038	0.193472	0.783283	0.640959	0.423023	1.51519	0.129725	0.313267	SLC25A15
ENSG00000124251	-3.77033	1.23963	-3.04149	0.00235411	0.0319519	1.499	0.942083	1.59115	0.111575	0.686062	-2.24752	1.32665	-1.69412	0.0902418	NaN	TP53TG5
ENSG00000114279	-1.94084	0.638171	-3.04125	0.00235599	0.0319551	-0.36043	0.729414	-0.494136	0.62121	0.958084	-2.25178	0.596461	-3.77524	0.000159851	0.00239476	FGF12
ENSG00000244879	1.23284	0.405465	3.04057	0.00236129	0.0319823	-1.2481	0.37996	-3.28482	0.00102047	0.0833535	0.0292347	0.445205	0.0656657	0.947644	0.976496	GABPB1-AS1
ENSG00000182508	-3.26029	1.07225	-3.0406	0.00236111	0.0319823	-3.07768	0.595956	-5.16428	2.41371e-07	0.000244707	-6.29597	1.12389	-5.60195	2.1195e-08	1.85855e-06	LHFPL1
ENSG00000118432	2.55686	0.841105	3.03988	0.00236671	0.0320332	-0.853545	0.760054	-1.12301	0.261435	0.841922	1.75354	0.801464	2.18792	0.0286753	0.111301	CNR1
ENSG00000182685	-1.61046	0.530037	-3.0384	0.00237839	0.0321689	1.38097	0.524061	2.63513	0.00841045	0.263578	-0.196585	0.585292	-0.335875	0.736965	0.86876	BRICD5
ENSG00000244617	-1.36024	0.447935	-3.03668	0.00239197	0.0323074	1.03036	0.480659	2.14365	0.0320611	0.493241	-0.28977	0.5255	-0.551417	0.581348	0.767952	ASPRV1
ENSG00000183230	-3.36333	1.1075	-3.03687	0.0023905	0.0323074	1.8435	0.591849	3.11482	0.00184056	0.114056	-1.48533	1.18986	-1.24832	0.211913	0.430309	CTNNA3
ENSG00000135049	-1.57645	0.519179	-3.03643	0.00239402	0.0323126	-0.123817	0.552735	-0.224008	0.822751	0.984493	-1.65144	0.498157	-3.31511	0.000916086	0.00883547	AGTPBP1
ENSG00000273066	-1.3395	0.441752	-3.03224	0.00242746	0.0327183	0.951225	0.638198	1.49049	0.136097	0.723037	-0.361908	0.703416	-0.514501	0.606902	0.784505	AL355987.4
ENSG00000179241	1.55523	0.512866	3.03242	0.00242598	0.0327183	-0.149472	0.592521	-0.252264	0.800837	0.984287	1.44633	0.591163	2.44658	0.0144221	0.0679168	LDLRAD3
ENSG00000286094	-3.14612	1.03818	-3.03043	0.00244205	0.0328921	0.657411	1.08771	0.604399	0.545578	0.943665	-2.43262	0.735116	-3.30916	0.000935763	0.00897544	AC026740.3
ENSG00000188818	-2.82885	0.933725	-3.02963	0.0024485	0.0329561	1.84776	1.01952	1.81238	0.069928	0.621961	-0.933941	0.566605	-1.64831	0.0992888	0.261902	ZDHHC11
ENSG00000266378	3.43239	1.13388	3.02711	0.002469	0.0330514	1.93123	1.60893	1.20032	0.230017	NaN	5.41832	1.44525	3.74905	0.000177506	0.00258826	AC005224.2
ENSG00000280033	-1.64079	0.54205	-3.02701	0.00246984	0.0330514	1.19342	0.589319	2.02508	0.0428588	0.5374	-0.413652	0.554178	-0.746424	0.455411	0.677695	AC116407.4
ENSG00000258738	1.27725	0.42174	3.02852	0.00245754	0.0330514	-1.06673	0.719378	-1.48285	0.138116	0.725426	0.257525	0.666167	0.386577	0.699069	0.844347	AL121603.2
ENSG00000165527	1.01618	0.335717	3.02688	0.00247093	0.0330514	-0.252262	0.416895	-0.605097	0.545114	0.943634	0.813747	0.358889	2.26741	0.0233653	0.0965314	ARF6
ENSG00000198909	-0.788638	0.260534	-3.02701	0.00246986	0.0330514	0.414714	0.32462	1.27754	0.201412	0.791541	-0.330671	0.294956	-1.12108	0.262252	0.490866	MAP3K3
ENSG00000168314	-5.51571	1.82202	-3.02725	0.00246792	0.0330514	0.933629	1.04406	0.894227	0.3712	0.890274	-4.54532	1.78979	-2.53959	0.0110984	0.0555529	MOBP
ENSG00000162736	1.03142	0.34068	3.02754	0.00246554	0.0330514	-0.162195	0.364666	-0.444777	0.656481	0.965992	0.917495	0.399363	2.2974	0.0215962	0.0913144	NCSTN
ENSG00000111696	-1.81853	0.600571	-3.02799	0.00246183	0.0330514	1.01265	0.697691	1.45143	0.146661	0.739841	-0.769294	0.664975	-1.15688	0.247323	0.474585	NT5DC3
ENSG00000223803	2.61613	0.863922	3.0282	0.00246016	0.0330514	-0.0178488	1.32327	-0.0134884	0.989238	NaN	2.65216	0.803038	3.30266	0.000957733	0.00914031	RPS20P14
ENSG00000261069	2.14448	0.708778	3.0256	0.00248143	0.033169	-0.887377	0.572121	-1.55103	0.120894	0.70011	1.31638	0.778627	1.69065	0.0909042	0.247363	AC124312.3
ENSG00000089486	-1.53669	0.508046	-3.0247	0.00248883	0.0332449	-0.331156	0.522892	-0.633317	0.526527	0.941295	-1.81461	0.378041	-4.80004	1.58638e-06	6.37083e-05	CDIP1
ENSG00000228203	-3.22837	1.06741	-3.02448	0.00249061	0.0332458	-0.55627	0.899346	-0.618528	0.536228	0.943157	-3.73456	1.18205	-3.15939	NaN	NaN	RNF144A-AS1
ENSG00000271394	1.33309	0.44095	3.02323	0.00250092	0.0333555	2.59816	3.31876	0.782872	0.433702	0.912357	1.46481	0.489744	2.99097	0.00278093	0.0201624	7SK
ENSG00000174514	-2.97333	0.983547	-3.02307	0.00250227	0.0333555	-0.268733	1.06187	-0.253075	0.80021	0.984287	-3.18929	0.743624	-4.28884	1.79605e-05	0.000419991	MFSD4A
ENSG00000226124	-1.50603	0.498215	-3.02285	0.00250405	0.0333563	-0.0939178	0.402339	-0.233429	0.815428	0.984454	-1.55787	0.533584	-2.91963	0.00350446	0.0238632	FTCDNL1
ENSG00000136267	-2.85187	0.943583	-3.02238	0.00250796	0.0333854	0.036476	0.838878	0.0434819	0.965317	0.996958	-2.76719	0.904917	-3.05795	0.00222858	0.0170474	DGKB
ENSG00000284650	2.86141	0.946819	3.02213	0.00251004	0.0333902	-0.531637	0.994232	-0.534721	0.592843	NaN	2.36913	0.970579	2.44094	0.0146489	0.0685671	AL031430.1
ENSG00000133048	3.36742	1.11446	3.02158	0.00251457	0.0334209	5.11353	1.0194	5.01622	5.2699e-07	0.000458527	8.50812	0.921044	9.23747	2.52387e-20	5.36071e-17	CHI3L1
ENSG00000186994	-1.92024	0.635538	-3.02144	0.00251579	0.0334209	-0.365413	0.63608	-0.574476	0.565646	0.947219	-2.2314	0.646869	-3.44955	0.00056153	0.00612334	KANK3
ENSG00000198830	1.37024	0.453617	3.0207	0.00252188	0.0334788	0.0297932	0.500187	0.0595641	0.952503	0.995221	1.44371	0.450836	3.2023	0.00136336	0.0118571	HMGN2
ENSG00000252481	1.52939	0.506507	3.01948	0.00253205	0.0335908	-0.7129	0.599316	-1.18952	0.234234	0.823548	0.8655	0.686985	1.25985	0.207723	0.424702	SCARNA13
ENSG00000188981	-1.64891	0.546141	-3.0192	0.00253447	0.0335999	0.547914	0.62996	0.869759	0.384432	0.896336	-1.06916	0.645151	-1.65723	0.0974728	0.258838	MSANTD1
ENSG00000185053	-5.08046	1.68321	-3.01831	0.0025419	0.0336754	-0.510936	1.19961	-0.425918	0.670168	0.966563	-5.71055	1.2927	-4.41753	9.98351e-06	0.000261505	SGCZ
ENSG00000221963	1.30564	0.432638	3.01785	0.00254576	0.0337035	0.377257	0.52773	0.714867	0.474691	0.92619	1.73662	0.603076	2.87961	0.00398172	0.0263464	APOL6
ENSG00000259319	-2.80308	0.929251	-3.01649	0.00255719	0.0338064	-0.530156	0.865684	-0.612413	0.540264	0.943247	-3.37826	0.71003	-4.75792	1.95602e-06	7.54754e-05	AF111167.2
ENSG00000178607	1.1878	0.393794	3.0163	0.00255877	0.0338064	0.269147	0.436176	0.61706	0.537195	0.943157	1.49697	0.367047	4.07841	4.53442e-05	0.000885393	ERN1
ENSG00000145050	1.29553	0.429471	3.01657	0.0025565	0.0338064	-0.416122	0.465278	-0.894351	0.371134	0.890274	0.927911	0.521603	1.77896	0.075246	0.217511	MANF
ENSG00000117724	1.96501	0.651605	3.01565	0.00256429	0.0338311	1.60149	0.613997	2.6083	0.00909939	0.275071	3.60478	0.732149	4.92356	8.49849e-07	3.92525e-05	CENPF
ENSG00000105376	-2.92178	0.96882	-3.01581	0.00256292	0.0338311	0.089209	1.09088	0.0817773	0.934824	0.994037	-2.78285	0.804319	-3.45988	0.000540413	0.00595763	ICAM5
ENSG00000188647	1.10532	0.366551	3.01546	0.00256587	0.0338311	0.00575898	0.352354	0.0163443	0.98696	0.999468	1.15517	0.380662	3.03465	0.00240818	0.0180741	PTAR1
ENSG00000135763	0.980777	0.325331	3.0147	0.00257234	0.0338933	-0.417685	0.457817	-0.91234	0.36159	0.884841	0.608228	0.370832	1.64017	0.100969	0.264801	URB2
ENSG00000261037	-4.76511	1.58168	-3.01268	0.00258952	0.0340426	0.0364579	1.40103	0.0260222	0.97924	0.998296	-4.68184	1.38291	-3.38549	NaN	NaN	AC010266.2
ENSG00000183722	1.0265	0.340741	3.01256	0.00259051	0.0340426	-0.098359	0.398898	-0.246577	0.805236	0.984287	0.979374	0.315655	3.10267	0.00191784	0.0152819	LHFPL6
ENSG00000080986	2.36615	0.785433	3.01254	0.00259069	0.0340426	1.14556	0.988452	1.15895	0.246478	0.831945	3.55088	1.00033	3.54971	0.000385648	0.0046133	NDC80
ENSG00000163082	-2.47382	0.82114	-3.01267	0.00258962	0.0340426	0.111121	0.793018	0.140124	0.888562	0.990789	-2.31118	0.731816	-3.15814	0.00158778	0.0132558	SGPP2
ENSG00000148468	-1.3623	0.452352	-3.0116	0.00259875	0.0341254	-0.885372	0.497817	-1.77851	0.0753202	0.633943	-2.19164	0.347025	-6.31551	2.69265e-10	4.2894e-08	FAM171A1
ENSG00000047056	-1.52488	0.506531	-3.01043	0.00260878	0.0342338	-0.238321	0.578924	-0.411661	0.680588	0.967505	-1.713	0.367915	-4.65596	3.22474e-06	0.000109054	WDR37
ENSG00000176383	-2.91461	0.969141	-3.00741	0.0026348	0.0345519	-0.214447	0.911239	-0.235336	0.813948	0.984454	-3.08235	1.01919	-3.0243	0.00249206	0.0185537	B3GNT4
ENSG00000003147	-1.84289	0.612878	-3.00695	0.00263883	0.0345813	0.375855	0.739484	0.508267	0.611266	0.956567	-1.42845	0.697668	-2.04746	0.0406127	0.141294	ICA1
ENSG00000202058	1.65233	0.549637	3.00622	0.0026452	0.0346414	-0.395961	0.543553	-0.728468	0.466327	0.92544	1.30392	0.641109	2.03385	0.0419667	0.144677	RN7SKP80
ENSG00000281160	-4.87279	1.62233	-3.00358	0.00266826	0.0348727	-0.01772	1.21375	-0.0145995	0.988352	0.999574	-4.87923	1.33502	-3.65481	0.000257373	0.00341641	AC018358.1
ENSG00000182718	2.15559	0.717656	3.00365	0.0026676	0.0348727	2.44906	0.752936	3.25268	0.00114322	0.0883327	4.63914	0.51192	9.06223	1.27811e-19	2.03604e-16	ANXA2
ENSG00000128482	-1.57307	0.523716	-3.00367	0.00266743	0.0348727	-0.105228	0.390845	-0.269232	0.787751	0.983129	-1.63765	0.593892	-2.75748	0.00582482	0.0344515	RNF112
ENSG00000271581	2.78745	0.928229	3.00298	0.00267353	0.0349181	1.94158	1.74802	1.11073	0.266686	NaN	4.78032	1.31078	3.64694	0.000265383	0.00349144	AL671883.2
ENSG00000161681	-3.39163	1.12973	-3.00214	0.00268085	0.03499	-0.455608	1.06248	-0.428817	0.668056	0.966563	-3.79452	0.973234	-3.89888	9.66372e-05	0.00161903	SHANK1
ENSG00000027075	-1.41331	0.470851	-3.00162	0.00268551	0.0350273	0.177734	0.462632	0.38418	0.700845	0.971349	-1.19466	0.47914	-2.49334	0.0126547	0.0614603	PRKCH
ENSG00000170558	1.432	0.477606	2.99828	0.00271504	0.0353887	-0.494774	0.377426	-1.31092	0.189886	0.780159	0.986501	0.51453	1.91728	0.0552019	0.17526	CDH2
ENSG00000099308	-2.22912	0.743601	-2.99773	0.00271997	0.0354291	-0.177069	0.834905	-0.212083	0.832042	0.985431	-2.35544	0.55649	-4.23268	2.30927e-05	0.000512112	MAST3
ENSG00000186862	-2.95632	0.986271	-2.99747	0.00272231	0.0354357	-0.12592	0.791981	-0.158994	0.873673	0.990635	-3.03586	0.998248	-3.04119	0.00235645	0.0177349	PDZD7
ENSG00000109339	-1.40229	0.467874	-2.99716	0.00272504	0.0354474	0.0785193	0.494259	0.158862	0.873777	0.990635	-1.27983	0.469221	-2.72756	0.0063805	0.0368711	MAPK10
ENSG00000024526	2.39739	0.800043	2.99658	0.00273031	0.0354921	0.919183	0.884641	1.03905	0.298784	0.856947	3.33993	0.993806	3.36075	0.000777319	0.00782889	DEPDC1
ENSG00000225683	-3.32652	1.11083	-2.99462	0.00274783	0.035696	2.01303	0.657426	3.06198	0.00219878	0.127913	-1.24725	1.40342	-0.88872	0.374154	NaN	PACRG-AS3
ENSG00000133466	1.77927	0.594261	2.99408	0.00275274	0.0357358	0.246356	0.6256	0.393792	0.693735	0.970066	2.06258	0.495646	4.16139	3.16315e-05	0.000662332	C1QTNF6
ENSG00000189157	-1.70505	0.569676	-2.99302	0.00276228	0.0358356	0.0214586	0.454963	0.0471655	0.962381	0.996417	-1.64355	0.587273	-2.79861	0.00513238	0.0315063	FAM47E
ENSG00000073605	-1.20163	0.401608	-2.99203	0.00277126	0.0358988	0.743558	0.690354	1.07707	0.28145	0.852157	-0.425651	0.734691	-0.579361	0.562346	0.756007	GSDMB
ENSG00000112232	-3.95839	1.32305	-2.99187	0.0027727	0.0358988	0.00527615	1.12296	0.00469842	0.996251	0.999574	-3.90897	1.25031	-3.12641	0.00176954	0.0143433	KHDRBS2
ENSG00000187800	-1.45386	0.485869	-2.99228	0.00276904	0.0358988	0.767329	0.463432	1.65575	0.0977715	0.673095	-0.642122	0.577437	-1.11202	0.266129	0.495793	PEAR1
ENSG00000155886	-2.78853	0.932218	-2.99128	0.00277807	0.0359443	-0.261234	0.856065	-0.305157	0.760247	0.981725	-2.99423	0.816213	-3.66845	0.000244028	0.00329438	SLC24A2
ENSG00000167900	2.0246	0.676902	2.99097	0.00278089	0.0359568	1.17525	0.800115	1.46885	0.141873	0.731986	3.23247	0.691369	4.67546	2.933e-06	0.000101387	TK1
ENSG00000117525	1.40472	0.469809	2.98998	0.00279	0.0360505	0.975278	0.528157	1.84657	0.0648097	0.608603	2.41975	0.504221	4.799	1.59461e-06	6.39048e-05	F3
ENSG00000284862	-2.97656	0.995656	-2.98954	0.00279394	0.0360589	0.944519	0.884047	1.0684	0.285339	0.853195	-1.59095	3.76892	-0.422123	0.672935	NaN	CCDC39
ENSG00000111907	-2.8278	0.945911	-2.9895	0.00279437	0.0360589	-0.229314	0.827943	-0.276968	0.781805	0.98269	-2.99215	0.77758	-3.84803	0.000119072	0.0018984	TPD52L1
ENSG00000120156	-2.40601	0.805033	-2.98871	0.00280162	0.0361284	0.376098	0.780888	0.481629	0.63007	0.960183	-1.97698	0.675961	-2.92469	0.00344794	0.0236069	TEK
ENSG00000279161	-3.07729	1.0298	-2.98825	0.0028058	0.0361582	1.27544	0.934424	1.36495	0.172269	0.765269	-1.77366	0.902791	-1.96464	0.0494559	NaN	AC093503.3
ENSG00000181649	3.11029	1.04106	2.98761	0.00281169	0.0362101	0.864439	1.58608	0.545017	0.585742	NaN	4.01823	1.26854	3.1676	0.00153703	0.0129094	PHLDA2
ENSG00000086232	0.973882	0.326097	2.98648	0.00282212	0.0363202	-0.520504	0.407362	-1.27774	0.20134	0.791541	0.502983	0.402672	1.24911	0.211624	0.429905	EIF2AK1
ENSG00000131781	-2.2388	0.750505	-2.98306	0.00285379	0.0366163	1.22836	0.72715	1.68928	0.0911661	0.662168	-0.975562	0.733068	-1.33079	0.183257	0.392065	FMO5
ENSG00000106701	-1.43079	0.47968	-2.98281	0.00285619	0.0366163	-0.248718	0.416257	-0.597509	0.550168	0.945101	-1.63484	0.472985	-3.45643	0.000547379	0.00600671	FSD1L
ENSG00000249896	-3.19767	1.07196	-2.983	0.00285436	0.0366163	-0.121153	0.889783	-0.13616	0.891695	0.990938	-3.27193	1.04031	-3.14516	0.00165995	0.0136421	LINC02495
ENSG00000166963	-2.29506	0.76926	-2.98347	0.00285004	0.0366163	-0.175453	0.788502	-0.222514	0.823914	0.98472	-2.41693	0.552937	-4.37108	1.23632e-05	0.000310152	MAP1A
ENSG00000283293	1.47325	0.493918	2.98278	0.00285646	0.0366163	-0.297256	0.526175	-0.564937	0.572117	0.94808	1.22162	0.563705	2.16712	0.0302258	0.115559	RN7SK
ENSG00000185418	-1.44007	0.482768	-2.98295	0.00285489	0.0366163	-0.0657145	0.449783	-0.146103	0.88384	0.990789	-1.46063	0.528861	-2.76184	0.00574762	0.0340801	TARSL2
ENSG00000131019	2.18079	0.731357	2.98184	0.0028652	0.0367042	0.392443	0.79831	0.491592	0.623008	0.958741	2.60507	0.916607	2.84208	0.00448197	0.0287026	ULBP3
ENSG00000260793	-1.64542	0.552054	-2.98053	0.00287746	0.0368368	0.103176	0.534997	0.192853	0.847074	0.987761	-1.50423	0.548011	-2.74488	0.00605323	0.0354297	AC003102.1
ENSG00000139133	1.23308	0.413844	2.97957	0.00288653	0.0369285	-0.622206	0.559917	-1.11125	0.266462	0.842693	0.660938	0.465175	1.42084	0.155364	0.353102	ALG10
ENSG00000175084	1.76918	0.593853	2.97916	0.00289041	0.0369538	1.56063	0.979457	1.59337	0.111078	0.686062	3.35532	0.815074	4.11658	3.84529e-05	0.000775385	DES
ENSG00000138411	-1.96627	0.660104	-2.97873	0.00289445	0.0369811	-0.390805	0.607722	-0.643065	0.520182	0.939498	-2.30743	0.688242	-3.35265	0.000800429	0.00800031	HECW2
ENSG00000162367	-1.69457	0.569142	-2.9774	0.00290702	0.0371172	0.220708	0.590723	0.373623	0.708685	0.971752	-1.43519	0.487852	-2.94186	0.00326251	0.0227364	TAL1
ENSG00000100162	1.83724	0.617346	2.97604	0.00291999	0.0372583	0.58867	0.830085	0.709168	0.47822	0.926621	2.46984	0.794838	3.10735	0.00188775	0.0150674	CENPM
ENSG00000079819	-1.04555	0.351474	-2.97476	0.00293217	0.037389	0.0659775	0.353278	0.186758	0.85185	0.98813	-0.935847	0.380244	-2.46118	0.0138481	0.065949	EPB41L2
ENSG00000132938	-3.91753	1.31715	-2.97425	0.00293702	0.0374262	0.0158088	1.71672	0.00920874	0.992653	0.999574	-3.83546	1.06703	-3.59451	NaN	NaN	MTUS2
ENSG00000064309	1.09054	0.366716	2.97378	0.00294151	0.0374589	-1.41566	0.436262	-3.24497	0.00117462	0.0891122	-0.272456	0.408543	-0.666898	0.504838	0.713974	CDON
ENSG00000235012	-2.55801	0.860433	-2.97293	0.0029497	0.03747	0.614043	0.768382	0.799138	0.42421	0.908824	-1.90517	1.20603	-1.57971	0.114174	NaN	AF121897.1
ENSG00000164161	-3.33448	1.12186	-2.97229	0.00295592	0.03747	1.3867	0.934937	1.4832	0.138021	0.725426	-1.91	1.07916	-1.76989	0.0767448	0.220112	HHIP
ENSG00000135318	1.90399	0.640489	2.97271	0.00295183	0.03747	-1.53706	0.516731	-2.97459	0.0029338	0.152497	0.423376	0.72548	0.583581	0.559502	0.753936	NT5E
ENSG00000262664	1.29192	0.434537	2.9731	0.00294805	0.03747	-1.06263	0.533193	-1.99295	0.0462671	0.55236	0.283174	0.513051	0.551941	0.580989	0.767871	OVCA2
ENSG00000115252	-3.46886	1.16679	-2.97299	0.00294913	0.03747	-0.208041	0.983836	-0.211459	0.832529	0.985519	-3.62425	1.0771	-3.36483	0.000765895	0.0077383	PDE1A
ENSG00000125630	1.04818	0.352649	2.97231	0.00295565	0.03747	-0.790221	0.466373	-1.6944	0.0901898	0.660506	0.304472	0.389291	0.782119	0.434145	0.659019	POLR1B
ENSG00000183578	-2.10395	0.707853	-2.9723	0.00295581	0.03747	-0.0574858	0.633352	-0.0907643	0.92768	0.993516	-2.10925	0.681854	-3.0934	0.00197876	0.015637	TNFAIP8L3
ENSG00000154162	-3.81045	1.28275	-2.97052	0.00297296	0.0376613	-0.27315	1.05979	-0.25774	0.796607	0.984062	-4.03956	1.27949	-3.15716	NaN	NaN	CDH12
ENSG00000268460	-3.82776	1.28905	-2.96945	0.00298335	0.0377683	-0.965328	1.04708	-0.921925	0.356568	0.883039	-4.75677	1.30751	-3.63805	0.000274707	0.00359469	AC006262.1
ENSG00000160781	-1.62781	0.548339	-2.96862	0.00299143	0.0378459	-0.888621	0.611788	-1.4525	0.146364	0.739841	-2.46396	0.461275	-5.34162	9.21207e-08	6.26683e-06	PAQR6
ENSG00000004660	-2.772	0.933869	-2.9683	0.00299454	0.0378605	0.0519756	0.999928	0.0519793	0.958545	0.995876	-2.6688	0.743725	-3.58843	0.000332677	0.00418191	CAMKK1
ENSG00000213024	0.988752	0.33316	2.9678	0.00299939	0.0378972	0.0790402	0.384537	0.205546	0.837145	0.986176	1.11559	0.373175	2.98945	0.00279485	0.0202219	NUP62
ENSG00000159128	1.48191	0.499396	2.96742	0.00300314	0.0379198	-0.0300499	0.437133	-0.0687431	0.945194	0.994738	1.49871	0.507839	2.95115	0.0031659	0.0221845	IFNGR2
ENSG00000229321	-2.10664	0.70998	-2.96719	0.00300538	0.0379234	0.683866	0.722162	0.94697	0.343654	0.878973	-1.37883	0.774021	-1.78139	0.0748491	0.216626	AC008269.1
ENSG00000163638	1.91723	0.646198	2.96694	0.00300779	0.0379291	0.783352	0.646316	1.21203	0.225502	0.816592	2.74901	0.788856	3.4848	0.000492506	0.00552184	ADAMTS9
ENSG00000159753	-3.33239	1.12338	-2.96641	0.00301299	0.0379699	-0.0289064	1.02155	-0.0282965	0.977426	0.997666	-3.31547	0.987423	-3.3577	0.000785934	0.0078783	CARMIL2
ENSG00000149305	-4.89889	1.65164	-2.96608	0.00301618	0.0379809	-1.08163	1.34344	-0.80512	0.42075	0.90704	-5.95343	1.49001	-3.99555	6.45442e-05	0.00117844	HTR3B
ENSG00000186310	-1.99178	0.671584	-2.96578	0.00301912	0.0379809	-0.573799	0.627319	-0.914684	0.360358	0.884012	-2.5103	0.592914	-4.23383	2.29744e-05	0.000510674	NAP1L3
ENSG00000169758	-2.63286	0.887763	-2.96572	0.00301974	0.0379809	-0.397007	0.900093	-0.441073	0.65916	0.966324	-2.98133	0.811174	-3.67533	0.000237539	0.00322271	TMEM266
ENSG00000072315	-3.95735	1.33509	-2.96412	0.00303551	0.0381546	-0.837872	1.00607	-0.832816	0.404949	0.902934	-4.74426	1.13204	-4.1909	2.77847e-05	0.000602192	TRPC5
ENSG00000276805	-1.47137	0.496559	-2.96314	0.00304523	0.0381619	0.196939	0.529459	0.371963	0.709921	0.971752	-1.23416	0.527865	-2.33803	0.0193858	0.0845106	AL133216.2
ENSG00000138641	-1.15294	0.389093	-2.96315	0.00304507	0.0381619	0.0775436	0.468295	0.165587	0.868482	0.990467	-1.02902	0.383271	-2.68484	0.00725647	0.0406788	HERC3
ENSG00000128944	1.53205	0.517051	2.96305	0.00304611	0.0381619	-0.25149	0.528263	-0.47607	0.634025	0.961584	1.32453	0.467615	2.83252	0.00461825	0.0292464	KNSTRN
ENSG00000185480	1.78102	0.601233	2.96228	0.00305366	0.0381619	0.106372	0.757103	0.140499	0.888266	0.990789	1.93607	0.627322	3.08625	0.00202697	0.0159062	PARPBP
ENSG00000204851	-2.43244	0.821112	-2.96238	0.00305271	0.0381619	-0.247869	0.88106	-0.28133	0.778457	0.982232	-2.62801	0.591854	-4.4403	8.98335e-06	0.00024085	PNMA8B
ENSG00000059915	-2.84381	0.959875	-2.96269	0.00304964	0.0381619	-0.414288	0.865018	-0.478936	0.631984	0.961331	-3.20437	0.856033	-3.74327	0.000181638	0.00263443	PSD
ENSG00000151552	-1.85835	0.627284	-2.96253	0.00305124	0.0381619	0.10683	0.691078	0.154584	0.877149	0.990789	-1.69636	0.364548	-4.65333	3.26619e-06	0.000109538	QDPR
ENSG00000213553	1.28531	0.433893	2.96227	0.00305382	0.0381619	-0.579371	0.544104	-1.06482	0.286959	0.853948	0.750173	0.442196	1.69647	0.0897967	0.245362	RPLP0P6
ENSG00000158715	-2.41628	0.81549	-2.96298	0.00304679	0.0381619	1.15644	0.816254	1.41676	0.156552	0.751789	-1.2224	0.698175	-1.75085	0.079971	0.226144	SLC45A3
ENSG00000106852	-3.91162	1.32079	-2.96157	0.00306078	0.0381751	-0.052413	1.18985	-0.0440499	0.964865	0.996958	-3.91562	0.927988	-4.21948	2.4487e-05	0.000536389	LHX6
ENSG00000089063	1.18805	0.401116	2.96186	0.00305792	0.0381751	-0.547344	0.466175	-1.17412	0.240347	0.827969	0.69461	0.380309	1.82644	0.0677847	0.202433	TMEM230
ENSG00000100219	1.19002	0.401806	2.96167	0.00305976	0.0381751	-0.454659	0.451732	-1.00648	0.314185	0.866442	0.788204	0.469974	1.67712	0.0935187	0.252216	XBP1
ENSG00000102934	-1.64624	0.555924	-2.96126	0.00306379	0.0381874	0.673404	0.611026	1.10209	0.270423	0.84437	-0.924078	0.605274	-1.52671	0.126833	0.30874	PLLP
ENSG00000166448	-2.90941	0.982554	-2.96107	0.00306571	0.0381874	-0.0190902	0.916242	-0.0208354	0.983377	0.999006	-2.87695	0.886629	-3.24482	0.00117525	0.0106172	TMEM130
ENSG00000084764	-1.41591	0.478338	-2.96006	0.00307575	0.0382878	-0.174793	0.526538	-0.331966	0.739915	0.977694	-1.54283	0.479456	-3.21788	0.00129141	0.0113973	MAPRE3
ENSG00000013588	2.2501	0.76034	2.95933	0.00308309	0.0383546	3.02572	1.05419	2.87018	0.00410244	0.179253	5.33813	1.02724	5.19657	2.03e-07	1.25179e-05	GPRC5A
ENSG00000183853	1.62013	0.547602	2.95858	0.00309057	0.0383857	0.259653	0.620822	0.418241	0.675771	0.967176	1.91818	0.514282	3.72982	0.000191618	0.00273765	KIRREL1
ENSG00000130368	-3.98303	1.3462	-2.95873	0.0030891	0.0383857	-0.537683	1.14082	-0.471311	0.637419	0.962186	-4.47311	1.24597	-3.59006	0.000330603	0.0041605	MAS1
ENSG00000095539	-1.23347	0.416928	-2.95849	0.00309153	0.0383857	-0.264712	0.470017	-0.563197	0.573301	0.94808	-1.44743	0.428255	-3.37983	0.000725317	0.00742246	SEMA4G
ENSG00000224536	-1.93893	0.655507	-2.95791	0.00309728	0.0384064	1.19428	0.786077	1.51929	0.128691	0.709766	-0.702132	0.959789	-0.731549	0.464444	NaN	AC096677.1
ENSG00000184349	-2.33382	0.789112	-2.95753	0.00310113	0.0384064	-0.0585723	0.711299	-0.0823455	0.934372	0.994037	-2.34313	0.70128	-3.34121	0.000834133	0.0082277	EFNA5
ENSG00000111640	1.26298	0.427036	2.95755	0.00310096	0.0384064	-0.124682	0.446352	-0.279336	0.779987	0.982232	1.18415	0.396107	2.98948	0.00279451	0.0202219	GAPDH
ENSG00000091536	-2.22169	0.751081	-2.95799	0.00309653	0.0384064	0.268258	0.694433	0.386298	0.699276	0.971313	-1.89068	0.825913	-2.2892	0.0220676	0.0927768	MYO15A
ENSG00000146918	1.33023	0.449903	2.95672	0.00310934	0.0384836	0.317209	0.467008	0.679236	0.496989	0.931575	1.692	0.462915	3.6551	0.000257078	0.00341641	NCAPG2
ENSG00000231533	-2.86111	0.968249	-2.95493	0.00312735	0.0386029	-0.729812	0.805961	-0.905518	0.365191	0.887855	-3.54138	0.988155	-3.58383	0.000338595	0.00422768	AL391840.1
ENSG00000160226	-0.942	0.318806	-2.95478	0.00312895	0.0386029	-0.146247	0.378556	-0.386328	0.699254	0.971313	-1.04232	0.3147	-3.3121	0.00092597	0.0089173	CFAP410
ENSG00000132507	0.91984	0.311269	2.95513	0.00312536	0.0386029	-0.38029	0.384822	-0.988225	0.323043	0.869295	0.588988	0.35186	1.67393	0.0941444	0.253191	EIF5A
ENSG00000163833	-5.43468	1.839	-2.95523	0.00312435	0.0386029	-0.245583	1.31893	-0.186199	0.852289	0.98813	-5.6364	1.45925	-3.86254	0.000112213	0.00181018	FBXO40
ENSG00000133195	-1.54628	0.523264	-2.95506	0.00312611	0.0386029	-0.0182617	0.603024	-0.0302836	0.975841	0.997418	-1.52172	0.537063	-2.83342	0.00460534	0.0291895	SLC39A11
ENSG00000233175	-2.99635	1.01418	-2.95447	0.00313211	0.0386174	-0.340402	0.898529	-0.378843	0.704804	0.971503	-3.28946	1.19657	-2.74909	0.00597617	0.0350969	AC008105.1
ENSG00000082153	1.12955	0.382651	2.95191	0.00315812	0.0388727	-0.574105	0.451851	-1.27056	0.203884	0.793223	0.603684	0.50777	1.18889	0.234482	0.459211	BZW1
ENSG00000177103	-1.58212	0.535976	-2.95184	0.00315883	0.0388727	-0.342884	0.500009	-0.685756	0.492867	0.930835	-1.88256	0.501929	-3.75064	0.000176381	0.00258169	DSCAML1
ENSG00000201901	1.29452	0.438544	2.95186	0.00315862	0.0388727	-0.224644	0.549408	-0.408884	0.682625	0.967535	1.11088	0.467199	2.37774	0.0174189	0.0782195	RN7SKP48
ENSG00000148773	2.2496	0.762343	2.9509	0.00316846	0.0389171	1.16529	0.735062	1.58529	0.112901	0.687858	3.44872	0.689002	5.00539	5.575e-07	2.80452e-05	MKI67
ENSG00000163918	1.18566	0.40175	2.95123	0.00316512	0.0389171	-0.353046	0.495393	-0.712659	0.476057	0.926578	0.874013	0.38909	2.2463	0.0246849	0.10008	RFC4
ENSG00000120802	1.15974	0.392992	2.95104	0.00316701	0.0389171	-0.206946	0.4131	-0.500957	0.616401	0.956854	1.00107	0.415021	2.4121	0.015861	0.0732001	TMPO
ENSG00000226310	-2.06007	0.698212	-2.9505	0.00317263	0.0389435	1.39711	0.705342	1.98075	0.047619	0.554713	-0.630783	0.814262	-0.774668	0.438536	NaN	AL022157.1
ENSG00000047617	-1.6673	0.565256	-2.94964	0.00318146	0.0390065	1.59804	0.459679	3.47643	0.000508136	0.0521478	-0.0243018	0.656157	-0.0370367	0.970456	0.987119	ANO2
ENSG00000136960	-3.21092	1.08859	-2.94961	0.00318178	0.0390065	0.900069	0.912387	0.9865	0.323888	0.869541	-2.26688	1.05281	-2.15318	0.0313047	0.118148	ENPP2
ENSG00000155561	1.03403	0.35059	2.94939	0.00318401	0.0390092	-0.030866	0.406934	-0.07585	0.939538	0.994037	1.04768	0.32535	3.22015	0.00128122	0.0113283	NUP205
ENSG00000231047	2.08926	0.708609	2.9484	0.0031942	0.0391093	1.52538	1.1689	1.30498	0.191901	NaN	3.65399	0.986818	3.7028	0.000213235	0.00297102	GCNT1P3
ENSG00000107679	-1.65672	0.561954	-2.94813	0.003197	0.0391189	0.0208594	0.707915	0.0294659	0.976493	0.997418	-1.58898	0.563378	-2.82045	0.00479559	0.0300369	PLEKHA1
ENSG00000166313	-1.3593	0.461141	-2.9477	0.0032015	0.0391492	-0.383381	0.505177	-0.758904	0.44791	0.916837	-1.6919	0.362564	-4.66649	3.06396e-06	0.000105154	APBB1
ENSG00000171848	2.22272	0.754243	2.94695	0.00320923	0.039219	1.62123	0.944956	1.71567	0.0862229	0.650393	3.88198	0.785669	4.94099	7.77271e-07	3.65968e-05	RRM2
ENSG00000116254	-3.75378	1.27433	-2.94568	0.00322248	0.0393313	-0.292879	1.25552	-0.233274	0.815549	0.984454	-3.99203	0.999976	-3.99213	6.54821e-05	0.00119442	CHD5
ENSG00000149658	0.845214	0.286929	2.94572	0.00322199	0.0393313	-0.647047	0.433909	-1.4912	0.135908	0.723037	0.247754	0.372861	0.664467	0.506392	0.715197	YTHDF1
ENSG00000168612	0.928239	0.315223	2.94471	0.00323258	0.0394297	-0.393847	0.401032	-0.982086	0.326058	0.87092	0.578269	0.33222	1.74062	0.0817499	0.229476	ZSWIM1
ENSG00000111581	1.10941	0.376816	2.94417	0.00323822	0.0394737	-0.0832267	0.363329	-0.229067	0.818817	0.984454	1.07025	0.427275	2.50482	0.0122513	0.0598811	NUP107
ENSG00000184678	1.27678	0.433705	2.94388	0.00324122	0.0394855	-0.276235	0.611803	-0.45151	0.651622	0.964354	1.04179	0.51061	2.04028	0.0413226	0.14315	HIST2H2BE
ENSG00000286456	3.40503	1.15683	2.94341	0.00324619	0.0395212	0.479701	1.85994	0.257912	0.796475	NaN	3.91819	1.22197	3.20646	0.0013438	0.0117404	AC016769.5
ENSG00000134686	1.06641	0.362415	2.94251	0.00325566	0.0395866	0.487367	0.389249	1.25207	0.210544	0.798644	1.59423	0.388034	4.10847	3.98287e-05	0.000798077	PHC2
ENSG00000167325	1.03954	0.353275	2.94258	0.00325486	0.0395866	-0.308958	0.393903	-0.784351	0.432834	0.912256	0.776904	0.398048	1.95179	0.0509636	0.165653	RRM1
ENSG00000174945	-1.65374	0.562076	-2.94221	0.0032588	0.0396001	-1.2503	0.497345	-2.51394	0.0119389	0.316452	-2.85672	0.619423	-4.6119	3.99012e-06	0.000127125	AMZ1
ENSG00000198408	-1.25844	0.42781	-2.94158	0.00326539	0.0396552	-0.0862264	0.499844	-0.172507	0.863039	0.990392	-1.29774	0.396115	-3.27616	0.0010523	0.00977079	OGA
ENSG00000132535	-1.54131	0.524056	-2.94112	0.00327032	0.0396903	-0.0338132	0.640281	-0.0528099	0.957883	0.995876	-1.52856	0.519718	-2.94112	0.00327024	0.0227644	DLG4
ENSG00000006432	-2.65492	0.90296	-2.94024	0.00327955	0.0397029	-0.345514	0.728188	-0.474484	0.635155	0.962186	-2.94885	0.920671	-3.20293	0.00136037	0.0118365	MAP3K9
ENSG00000143416	-2.6253	0.892871	-2.94029	0.00327902	0.0397029	-0.00440398	0.641002	-0.00687046	0.994518	0.999574	-2.58238	0.986566	-2.61754	0.00885663	0.0472519	SELENBP1
ENSG00000198964	-1.37035	0.466028	-2.94048	0.00327703	0.0397029	-0.398113	0.493427	-0.806833	0.419762	0.906278	-1.71932	0.346294	-4.96492	6.87298e-07	3.32618e-05	SGMS1
ENSG00000132872	-3.88001	1.31954	-2.94043	0.00327757	0.0397029	-0.564255	0.989662	-0.570149	0.568577	0.947959	-4.38563	1.22281	-3.58652	0.000335114	0.00419793	SYT4
ENSG00000130726	1.14368	0.389173	2.93874	0.00329552	0.0398713	0.0153572	0.44853	0.0342389	0.972687	0.997418	1.20788	0.42233	2.86005	0.00423574	0.0275316	TRIM28
ENSG00000233966	2.09326	0.712453	2.9381	0.00330231	0.0399284	-0.347188	0.755449	-0.459579	0.645818	0.964326	1.80186	0.70097	2.57052	0.0101546	0.0521814	UBE2SP1
ENSG00000233922	-3.57849	1.21804	-2.9379	0.00330444	0.0399294	3.29664	1.17538	2.80474	0.00503566	0.202037	-0.281323	1.35501	-0.207618	0.835528	NaN	LINC01694
ENSG00000123427	1.50964	0.513904	2.9376	0.00330763	0.039943	0.00411019	0.583927	0.00703888	0.994384	0.999574	1.55943	0.623137	2.50255	0.0123303	0.0601749	EEF1AKMT3
ENSG00000166446	-2.35935	0.803304	-2.93706	0.00331345	0.0399883	0.495217	0.642891	0.770297	0.441124	0.915933	-1.81863	0.80606	-2.2562	0.024058	0.098373	CDYL2
ENSG00000117266	-2.48556	0.846465	-2.9364	0.00332043	0.0399908	1.76513	0.867038	2.03582	0.0417689	0.531427	-0.690291	0.534575	-1.29129	0.196604	0.410537	CDK18
ENSG00000115041	-1.79171	0.610229	-2.93613	0.00332331	0.0399908	-1.4857	0.472181	-3.14645	0.00165264	0.106002	-3.22878	0.636936	-5.06924	3.99417e-07	2.18775e-05	KCNIP3
ENSG00000185818	-1.69579	0.577479	-2.93654	0.00331897	0.0399908	-0.36943	0.594358	-0.621561	0.53423	0.943157	-2.01322	0.405916	-4.9597	7.06015e-07	3.39954e-05	NAT8L
ENSG00000126457	1.22788	0.418203	2.93609	0.00332378	0.0399908	0.0111751	0.381122	0.0293215	0.976608	0.997418	1.28889	0.434684	2.96511	0.00302577	0.0215021	PRMT1
ENSG00000119703	-1.61404	0.549729	-2.93607	0.00332397	0.0399908	0.617302	0.595099	1.03731	0.299592	0.857802	-0.966825	0.702768	-1.37574	0.168902	0.373098	ZC2HC1C
ENSG00000117020	-1.5703	0.534956	-2.93539	0.00333132	0.0400544	-0.311905	0.623035	-0.500623	0.616637	0.957119	-1.83295	0.49741	-3.68499	0.000228714	0.00313412	AKT3
ENSG00000119946	-4.03913	1.37661	-2.93412	0.00334499	0.0401938	-0.371241	1.08521	-0.342093	0.732281	0.97628	-4.35964	1.20258	-3.62525	0.000288681	0.00372112	CNNM1
ENSG00000145214	-1.04374	0.355838	-2.9332	0.00335487	0.0402777	0.255356	0.40146	0.636068	0.524732	0.941112	-0.747124	0.368096	-2.0297	0.0423871	0.145575	DGKQ
ENSG00000101407	1.18765	0.404914	2.93308	0.00335613	0.0402777	-0.0758773	0.380675	-0.199323	0.84201	0.986557	1.15941	0.414728	2.79559	0.00518049	0.0317449	TTI1
ENSG00000174332	-3.29995	1.12539	-2.93228	0.00336479	0.0403566	0.328408	1.00706	0.326107	0.744343	0.977694	-2.90434	0.893135	-3.25185	0.00114658	0.0104399	GLIS1
ENSG00000132688	1.33428	0.455078	2.93198	0.00336813	0.0403718	0.963048	0.630386	1.52771	0.126584	0.708113	2.34156	0.506719	4.62103	3.81846e-06	0.000122473	NES
ENSG00000163923	-2.03921	0.695725	-2.93105	0.00337815	0.0404668	1.57273	0.787692	1.99663	0.0458657	0.55236	-0.455319	1.05409	-0.431955	0.665774	NaN	RPL39L
ENSG00000255529	1.13513	0.387353	2.93048	0.00338442	0.0405169	-1.57985	0.529295	-2.98481	0.00283752	0.149827	-0.389313	0.535004	-0.727683	0.466808	0.685769	POLR2M
ENSG00000145416	-1.57687	0.538261	-2.92956	0.0033944	0.0406113	-0.119127	0.438281	-0.271804	0.785773	0.983129	-1.65246	0.566137	-2.91884	0.0035134	0.0238926	MARCH1
ENSG00000198216	-2.78297	0.950044	-2.9293	0.00339722	0.0406199	-0.422644	0.820788	-0.514925	0.606606	0.956144	-3.1551	0.960789	-3.28386	0.00102395	0.00958092	CACNA1E
ENSG00000215021	0.856942	0.292574	2.92897	0.00340086	0.0406384	-0.546629	0.397862	-1.37391	0.169468	0.765119	0.3598	0.377679	0.95266	0.340762	0.573871	PHB2
ENSG00000130477	-2.01792	0.689313	-2.92744	0.00341763	0.0408136	-0.714951	0.752511	-0.950086	0.342069	0.878597	-2.67887	0.463786	-5.77609	7.64555e-09	7.73293e-07	UNC13A
ENSG00000269514	-1.42678	0.487553	-2.92642	0.00342889	0.0408902	0.426934	0.606219	0.704258	0.481272	0.92808	-0.967726	0.663954	-1.45752	0.144973	0.336568	AC024257.3
ENSG00000259295	-1.38318	0.472706	-2.92609	0.00343248	0.0408902	0.282727	0.593623	0.476272	0.63388	0.961569	-1.05785	0.488283	-2.16646	0.0302757	0.115668	CSPG4P12
ENSG00000197409	1.70815	0.583747	2.92618	0.00343153	0.0408902	2.16446	0.957196	2.26125	0.0237437	0.429384	3.91604	0.936828	4.18011	2.91374e-05	0.000624428	HIST1H3D
ENSG00000145934	-3.84372	1.31347	-2.92639	0.00342918	0.0408902	-0.269945	0.978711	-0.275817	0.782689	0.982756	-4.0656	1.82043	-2.23332	0.0255281	0.102412	TENM2
ENSG00000254966	-2.17196	0.742427	-2.92549	0.00343913	0.0409442	0.247425	0.623418	0.396885	0.691452	0.968795	-1.88644	0.87018	-2.16788	0.0301681	NaN	AC103974.1
ENSG00000136108	1.34847	0.461133	2.92426	0.00345279	0.0410816	-0.0712585	0.391895	-0.18183	0.855716	0.988674	1.31857	0.491555	2.68244	0.00730865	0.0408721	CKAP2
ENSG00000065675	-1.66175	0.568379	-2.92367	0.00345932	0.0411341	-0.0398985	0.506508	-0.0787717	0.937214	0.994037	-1.6439	0.537396	-3.05901	0.00222066	0.0169937	PRKCQ
ENSG00000108924	-3.02056	1.03325	-2.92337	0.00346265	0.0411485	-0.548973	0.962421	-0.570409	0.5684	0.947794	-3.51124	0.807608	-4.3477	1.37574e-05	0.00033673	HLF
ENSG00000120907	-1.99998	0.684272	-2.92278	0.00346919	0.0412009	-1.23078	0.676184	-1.82019	0.0687304	0.617716	-3.17814	0.656696	-4.83959	1.30106e-06	5.47823e-05	ADRA1A
ENSG00000070808	-3.54234	1.21221	-2.92222	0.00347541	0.0412494	-0.0254696	1.25496	-0.0202951	0.983808	0.999022	-3.5173	0.912462	-3.85474	0.000115852	0.00185792	CAMK2A
ENSG00000259065	-2.54538	0.871385	-2.92108	0.0034882	0.041376	-0.142397	1.01362	-0.140484	0.888278	0.990789	-2.64949	0.862743	-3.07101	0.00213337	0.0164774	AC005520.2
ENSG00000228221	-2.62046	0.897185	-2.92076	0.00349176	0.0413928	2.07936	0.971174	2.14107	0.0322681	0.493241	-0.472295	1.49334	-0.316269	0.751798	NaN	LINC00578
ENSG00000102385	-1.8691	0.640059	-2.9202	0.00349808	0.0414424	-0.390275	0.48845	-0.799006	0.424287	0.908824	-2.21646	0.717082	-3.09095	0.00199519	0.0157214	DRP2
ENSG00000176014	1.92646	0.659782	2.91984	0.00350207	0.0414644	1.82044	0.683203	2.66457	0.00770865	0.250864	3.77433	0.594959	6.34384	2.24108e-10	3.79119e-08	TUBB6
ENSG00000035499	1.84162	0.630821	2.9194	0.00350703	0.0414724	0.802444	0.752359	1.06657	0.286166	0.853195	2.69103	0.622849	4.32052	1.55664e-05	0.000372423	DEPDC1B
ENSG00000277363	-2.24665	0.769532	-2.9195	0.00350596	0.0414724	0.547836	0.752442	0.728077	0.466566	0.925697	-1.65719	0.680339	-2.43583	0.0148578	0.069392	SRCIN1
ENSG00000116745	2.33125	0.798652	2.91897	0.00351186	0.0415041	-1.11475	0.817292	-1.36395	0.172582	0.765269	1.24834	0.662323	1.88479	0.0594576	0.184213	RPE65
ENSG00000161888	1.7109	0.586206	2.9186	0.00351604	0.0415283	1.34935	0.640544	2.10657	0.0351551	0.509052	3.09748	0.623307	4.96943	6.71513e-07	3.25803e-05	SPC24
ENSG00000168646	-1.25207	0.42912	-2.91775	0.00352564	0.0415657	-0.308882	0.451404	-0.68427	0.493805	0.930954	-1.50807	0.502526	-3.00098	0.00269109	0.0197099	AXIN2
ENSG00000163041	1.10225	0.377753	2.9179	0.00352394	0.0415657	-0.473769	0.516536	-0.917205	0.359035	0.883766	0.671268	0.471665	1.42319	0.154682	0.351969	H3F3A
ENSG00000184990	1.13302	0.388287	2.91801	0.00352277	0.0415657	-0.156008	0.387977	-0.402107	0.687605	0.968594	1.02555	0.383045	2.67735	0.00742072	0.0413449	SIVA1
ENSG00000135519	-2.52648	0.866323	-2.91633	0.00354174	0.0417048	-0.377521	0.969693	-0.38932	0.69704	0.970849	-2.85508	0.790411	-3.61214	0.000303677	0.003883	KCNH3
ENSG00000069869	1.08011	0.370359	2.9164	0.00354101	0.0417048	0.317314	0.471895	0.672424	0.501314	0.933096	1.44212	0.352787	4.08779	4.35502e-05	0.000856487	NEDD4
ENSG00000139722	1.03273	0.354179	2.91585	0.00354719	0.0417435	-0.350747	0.459187	-0.763843	0.444961	0.916837	0.733425	0.365942	2.00421	0.0450478	0.15228	VPS37B
ENSG00000168394	1.84527	0.632905	2.91556	0.00355049	0.041757	0.132893	0.601706	0.220861	0.825201	0.984955	2.03863	0.762575	2.67335	0.00750977	0.04174	TAP1
ENSG00000232434	-1.67301	0.573981	-2.91475	0.00355968	0.0418391	-0.351987	0.637355	-0.552261	0.580769	0.949322	-1.97448	0.474003	-4.16555	3.10603e-05	0.000654247	AJM1
ENSG00000267065	-2.511	0.861543	-2.91453	0.00356219	0.0418391	0.473772	1.02029	0.464353	0.642395	0.96361	-2.01123	1.27445	-1.57811	0.11454	NaN	LINC02080
ENSG00000102007	1.6917	0.580467	2.91438	0.00356394	0.0418391	2.02626	0.691345	2.9309	0.00337984	0.1622	3.75324	0.431785	8.69238	3.54935e-18	4.5233e-15	PLP2
ENSG00000255468	-1.55858	0.534904	-2.91375	0.00357119	0.0418782	0.39377	0.495002	0.79549	0.426328	0.909939	-1.12837	0.55378	-2.03757	0.0415925	0.143802	AP001107.9
ENSG00000234171	1.24615	0.427685	2.91371	0.0035716	0.0418782	-1.20215	0.607524	-1.97876	0.047843	0.554713	0.093977	0.55504	0.169316	0.865548	0.936697	RNASEH1-AS1
ENSG00000230989	1.12645	0.386735	2.91271	0.00358312	0.0419515	-0.97602	0.524432	-1.8611	0.0627303	0.601831	0.203025	0.541958	0.374613	0.707948	0.850402	HSBP1
ENSG00000178394	-3.94444	1.35427	-2.9126	0.00358434	0.0419515	0.29749	1.27948	0.232508	0.816144	0.984454	-3.59623	1.04899	-3.42829	0.000607397	0.00652304	HTR1A
ENSG00000174442	1.10283	0.37863	2.91269	0.00358327	0.0419515	0.0330615	0.460676	0.0717674	0.942787	0.994573	1.17839	0.368702	3.19604	0.0013933	0.0120627	ZWILCH
ENSG00000244198	-2.10588	0.723225	-2.9118	0.00359358	0.0420341	2.16456	0.705064	3.07002	0.00214044	0.125614	0.0870642	0.734303	0.118567	0.905618	0.954954	AC004889.1
ENSG00000137563	1.9116	0.656546	2.91161	0.00359574	0.0420341	-0.384794	0.711126	-0.541105	0.588435	0.951183	1.57684	0.526198	2.99667	0.00272948	0.0198845	GGH
ENSG00000184270	1.67913	0.576751	2.91137	0.00359852	0.0420413	-0.778102	0.679313	-1.14543	0.252033	0.835689	0.962487	0.483515	1.9906	0.0465246	0.155837	HIST2H2AB
ENSG00000164087	1.47911	0.508133	2.91087	0.00360428	0.0420579	0.0245341	0.560393	0.0437801	0.96508	0.996958	1.54771	0.507497	3.0497	0.0022907	0.0173924	POC1A
ENSG00000108309	-2.78999	0.958447	-2.91095	0.0036033	0.0420579	-0.461538	0.871958	-0.529312	0.596589	0.954507	-3.19517	0.817283	-3.90951	9.24849e-05	0.00156041	RUNDC3A
ENSG00000133612	-1.40332	0.4823	-2.90963	0.00361855	0.042199	-0.000271105	0.537275	-0.000504592	0.999597	0.99991	-1.35705	0.490806	-2.76494	0.00569334	0.0338519	AGAP3
ENSG00000106144	1.32573	0.455812	2.9085	0.00363173	0.0423272	0.417723	0.510323	0.818546	0.413045	0.904165	1.78209	0.402114	4.43179	9.34531e-06	0.000248809	CASP2
ENSG00000149571	-2.84992	0.979978	-2.90815	0.00363576	0.0423488	0.285331	0.94633	0.301513	0.763023	0.982196	-2.52017	0.922809	-2.73098	0.00631468	0.0366014	KIRREL3
ENSG00000260196	-2.3506	0.808477	-2.90745	0.00364394	0.0423532	-0.713298	0.661136	-1.0789	0.280633	0.851599	-3.0213	0.694565	-4.34992	1.3619e-05	0.000335262	AC124798.1
ENSG00000201201	1.86053	0.639863	2.90769	0.00364104	0.0423532	-0.564377	0.844491	-0.668304	0.503939	0.933667	1.34144	0.726087	1.84749	0.0646758	0.195717	RN7SKP118
ENSG00000126562	3.08168	1.05996	2.90736	0.00364489	0.0423532	0.448476	0.997047	0.449804	0.652852	0.964624	3.5915	1.33219	2.69594	0.00701908	0.0395918	WNK4
ENSG00000060138	1.39053	0.47826	2.90747	0.00364362	0.0423532	0.877619	0.37528	2.33857	0.0193577	0.395656	2.31297	0.538357	4.29636	1.73628e-05	0.000409257	YBX3
ENSG00000168282	1.19452	0.410904	2.90706	0.00364842	0.0423689	-0.207734	0.445261	-0.466544	0.640826	0.963286	1.03767	0.46993	2.20813	0.0272352	0.107673	MGAT2
ENSG00000262155	-1.51928	0.522675	-2.90675	0.00365208	0.042386	0.398461	0.540219	0.73759	0.460763	0.923835	-1.07664	0.680859	-1.5813	0.11381	0.286715	LINC02175
ENSG00000183773	-3.18155	1.09497	-2.90559	0.00366558	0.0425172	-0.0384718	1.01584	-0.0378718	0.96979	0.997319	-3.16625	0.885761	-3.57461	0.000350745	0.00432292	AIFM3
ENSG00000165802	-1.12931	0.388706	-2.9053	0.00366904	0.0425319	-0.472119	0.415828	-1.13537	0.256221	0.838501	-1.55396	0.382493	-4.06272	4.85034e-05	0.000929327	NSMF
ENSG00000137872	1.52535	0.525193	2.90435	0.00368013	0.0426349	-0.937859	0.558452	-1.67939	0.0930761	0.666663	0.645483	0.41841	1.5427	0.122903	0.302369	SEMA6D
ENSG00000185046	-3.04577	1.04906	-2.90332	0.00369224	0.0427497	-0.165053	0.703766	-0.234529	0.814574	0.984454	-3.15929	1.09788	-2.87764	0.00400666	0.0264513	ANKS1B
ENSG00000157087	-2.30855	0.795369	-2.90249	0.00370213	0.0427621	-0.528551	0.76756	-0.688612	0.491067	0.930751	-2.78475	0.695568	-4.00356	6.23974e-05	0.0011451	ATP2B2
ENSG00000100364	-1.6035	0.552457	-2.90249	0.00370207	0.0427621	0.10801	0.488664	0.221032	0.825068	0.984923	-1.44505	0.513892	-2.81197	0.00492394	0.0306001	KIAA0930
ENSG00000163536	-3.18904	1.0987	-2.90255	0.00370133	0.0427621	-0.333354	1.11567	-0.298794	0.765097	0.982232	-3.46542	0.840421	-4.12343	3.7327e-05	0.000756674	SERPINI1
ENSG00000165730	-2.1204	0.730531	-2.90255	0.00370142	0.0427621	-0.23795	0.671614	-0.354296	0.723117	0.973789	-2.30535	0.773098	-2.98197	0.00286403	0.0206133	STOX1
ENSG00000064666	1.59625	0.550052	2.902	0.00370791	0.0428033	0.247883	0.56227	0.44086	0.659314	0.966324	1.89833	0.659901	2.87669	0.00401873	0.02651	CNN2
ENSG00000278434	-1.72294	0.593886	-2.90114	0.00371811	0.0428488	1.4562	0.571133	2.54967	0.0107826	0.300731	-0.231595	0.699009	-0.331319	0.740403	0.870934	AC023830.3
ENSG00000280279	-2.02565	0.69819	-2.90128	0.00371637	0.0428488	0.841285	0.743838	1.131	0.258053	0.840032	-1.16216	0.819425	-1.41826	0.156114	0.354175	AC240565.2
ENSG00000228232	1.37031	0.472567	2.89971	0.00373512	0.0428488	-0.0563518	0.568471	-0.0991288	0.921036	0.993215	1.36421	0.466885	2.92193	0.00347866	0.0237408	GAPDHP1
ENSG00000189152	-2.77707	0.957553	-2.90018	0.00372951	0.0428488	2.113	0.822357	2.56944	0.0101862	0.292044	-0.638291	1.12846	-0.565628	0.571647	NaN	GRAPL
ENSG00000224116	-3.22464	1.11167	-2.90071	0.0037232	0.0428488	-0.836236	0.760237	-1.09997	0.271346	0.845118	-4.01045	1.01699	-3.94344	8.03216e-05	0.00139839	INHBA-AS1
ENSG00000069424	-2.63893	0.910071	-2.89969	0.00373527	0.0428488	-0.129918	0.973072	-0.133513	0.893788	0.991044	-2.71515	0.657681	-4.12837	3.65346e-05	0.000745353	KCNAB2
ENSG00000101825	3.2403	1.11721	2.90034	0.00372756	0.0428488	1.20474	0.787966	1.52892	0.126284	0.707619	4.4764	1.12591	3.97579	7.01449e-05	0.00125905	MXRA5
ENSG00000109805	2.11023	0.727558	2.90043	0.0037265	0.0428488	2.15765	0.923894	2.33539	0.019523	0.396698	4.30839	0.766624	5.61995	1.91011e-08	1.69831e-06	NCAPG
ENSG00000123360	-2.72057	0.93825	-2.89962	0.00373617	0.0428488	-0.073291	0.920456	-0.0796247	0.936536	0.994037	-2.74551	0.890648	-3.0826	0.00205203	0.0160477	PDE1B
ENSG00000128228	1.40397	0.484014	2.90068	0.00372348	0.0428488	-0.716524	0.653879	-1.0958	0.273164	0.846493	0.738847	0.587576	1.25745	0.208591	0.42587	SDF2L1
ENSG00000204519	1.21763	0.419917	2.8997	0.00373518	0.0428488	0.279689	0.455424	0.614129	0.53913	0.943157	1.5454	0.437335	3.53367	0.000409831	0.00483374	ZNF551
ENSG00000157680	-1.87484	0.646705	-2.89906	0.00374278	0.0428751	-0.111494	0.469225	-0.237614	0.812181	0.984454	-1.93663	0.687999	-2.81488	0.00487958	0.0304369	DGKI
ENSG00000180543	-2.78272	0.959871	-2.89906	0.00374289	0.0428751	0.112091	0.898547	0.124747	0.900724	0.991758	-2.61857	0.872749	-3.00037	0.00269649	0.0197192	TSPYL5
ENSG00000102144	1.47757	0.510045	2.89695	0.00376815	0.0431389	-0.188874	0.445128	-0.424313	0.671338	0.966563	1.3366	0.543694	2.45837	0.0139567	0.066285	PGK1
ENSG00000225140	-4.22091	1.45747	-2.89606	0.00377886	0.0432105	0.748416	1.1608	0.644741	0.519095	0.939498	-3.41715	1.71856	-1.98838	0.0467699	NaN	AL358216.1
ENSG00000115963	1.82555	0.630335	2.89616	0.00377764	0.0432105	-0.789409	0.605416	-1.30391	0.192263	0.782883	1.07706	0.708404	1.5204	0.12841	0.310964	RND3
ENSG00000124713	-2.16055	0.746106	-2.89577	0.00378225	0.0432238	0.33268	0.764737	0.435025	0.663544	0.966563	-1.77802	0.983658	-1.80756	0.070675	NaN	GNMT
ENSG00000284946	1.73466	0.599082	2.89552	0.00378526	0.0432327	-0.136641	0.638805	-0.2139	0.830625	0.985231	1.64953	0.65072	2.53493	0.011247	0.0560618	AC068831.7
ENSG00000188766	2.07005	0.715007	2.89514	0.00378987	0.0432599	-0.392895	0.669485	-0.586861	0.557297	0.946089	1.70605	0.847673	2.01263	0.0441537	0.149999	SPRED3
ENSG00000204282	-2.10142	0.725899	-2.89493	0.00379248	0.0432642	0.847862	0.666963	1.27123	0.203648	0.793223	-1.22672	0.648891	-1.89049	0.0586925	0.182642	TNRC6C-AS1
ENSG00000180263	-1.82667	0.631265	-2.89367	0.00380773	0.0433875	-0.16213	0.573136	-0.282883	0.777267	0.982232	-1.93537	0.589981	-3.28039	0.00103663	0.00965769	FGD6
ENSG00000179761	1.69109	0.584411	2.89366	0.00380776	0.0433875	-0.751802	0.739296	-1.01692	0.309193	0.8622	0.986082	0.600048	1.64334	0.100313	0.263694	PIPOX
ENSG00000008282	1.03973	0.359372	2.8932	0.00381344	0.0434266	-0.511811	0.526223	-0.972611	0.330747	0.873104	0.574114	0.504665	1.13761	0.255282	0.483308	SYPL1
ENSG00000174672	-1.66933	0.577075	-2.89274	0.003819	0.0434644	-0.104225	0.528777	-0.197106	0.843744	0.986985	-1.72572	0.614241	-2.80952	0.00496162	0.0307743	BRSK2
ENSG00000126749	0.931755	0.322228	2.89161	0.00383277	0.0435955	-0.826549	0.386024	-2.14118	0.0322592	0.493241	0.151148	0.352275	0.429063	0.667878	0.824751	EMG1
ENSG00000101189	0.909861	0.314711	2.8911	0.00383898	0.0436406	0.0460772	0.388949	0.118466	0.905698	0.991951	1.00586	0.332324	3.02674	0.00247204	0.0184375	MRGBP
ENSG00000109501	-1.7915	0.619704	-2.89089	0.00384151	0.0436437	-0.173003	0.680984	-0.254049	0.799458	0.984287	-1.91939	0.462512	-4.14992	3.32589e-05	0.000689562	WFS1
ENSG00000006740	-3.54797	1.22765	-2.89004	0.00385195	0.0437111	-0.420599	0.986352	-0.426419	0.669802	0.966563	-3.91401	1.09668	-3.56896	0.000358407	0.00437783	ARHGAP44
ENSG00000135097	1.04752	0.362452	2.8901	0.00385115	0.0437111	-0.599252	0.553314	-1.08302	0.278798	0.849488	0.494452	0.504491	0.9801	0.327037	0.559781	MSI1
ENSG00000102359	2.54982	0.8825	2.88932	0.00386079	0.0437602	3.48373	0.7663	4.54617	5.46301e-06	0.00273366	6.04715	0.924957	6.53776	6.24461e-11	1.29752e-08	SRPX2
ENSG00000187735	0.763775	0.264332	2.88945	0.00385915	0.0437602	-0.619473	0.446385	-1.38776	0.165211	0.759269	0.196017	0.421851	0.46466	0.642175	0.809132	TCEA1
ENSG00000272899	-1.63871	0.56724	-2.88893	0.00386561	0.0437891	0.0620442	0.568041	0.109225	0.913024	0.992295	-1.53833	0.483532	-3.18145	0.00146542	0.0124946	ATP6V1FNB
ENSG00000154065	-2.18516	0.756512	-2.88847	0.00387126	0.0438276	-0.225879	0.664944	-0.339696	0.734086	0.976635	-2.36267	0.660497	-3.57712	0.000347407	0.00430551	ANKRD29
ENSG00000131873	1.20621	0.417727	2.88756	0.00388247	0.0439287	-0.0448802	0.404486	-0.110956	0.911651	0.992092	1.20472	0.412408	2.92118	0.00348704	0.023781	CHSY1
ENSG00000171840	-2.74803	0.952024	-2.88651	0.00389538	0.0440461	0.800554	0.859441	0.931482	0.351604	0.883039	-1.90294	0.973917	-1.9539	0.050713	0.165164	NINJ2
ENSG00000171680	-1.83977	0.637404	-2.88635	0.00389739	0.0440461	0.74568	0.735665	1.01361	0.310768	0.863315	-1.05046	0.751807	-1.39725	0.162338	0.362954	PLEKHG5
ENSG00000250056	-2.93231	1.0162	-2.88556	0.00390714	0.0441307	-0.240068	0.87366	-0.274784	0.783482	0.983083	-3.11375	0.828521	-3.7582	0.000171139	0.00253015	LINC01018
ENSG00000215417	1.83292	0.63535	2.8849	0.00391537	0.0441978	-0.488471	0.845172	-0.577955	0.563295	0.946564	1.39025	0.617421	2.25171	0.0243407	0.0991259	MIR17HG
ENSG00000136867	-1.87406	0.649665	-2.88466	0.00391837	0.044206	0.725785	0.693644	1.04634	0.295406	0.85608	-1.10583	0.58361	-1.89482	0.0581166	0.181618	SLC31A2
ENSG00000128596	-1.42927	0.495694	-2.88337	0.00393444	0.0443614	1.19799	0.64751	1.85014	0.0642928	0.607186	-0.206647	0.587675	-0.351635	0.725112	0.861107	CCDC136
ENSG00000111058	1.89133	0.656023	2.88302	0.0039388	0.0443847	1.53179	0.474651	3.22718	0.00125015	0.0926335	3.46515	0.759622	4.56168	5.07467e-06	0.000154964	ACSS3
ENSG00000135116	-1.73311	0.60154	-2.88111	0.00396273	0.0446284	-0.570966	0.532962	-1.07131	0.284031	0.852978	-2.2365	0.534744	-4.18237	2.88486e-05	0.000620467	HRK
ENSG00000239455	-1.6283	0.565215	-2.88085	0.00396609	0.0446404	0.53208	0.773712	0.687697	0.491643	0.930751	-1.06426	0.889072	-1.19705	0.231288	0.455098	AC074043.1
ENSG00000203808	-2.01494	0.699694	-2.87975	0.00397996	0.044641	0.285947	0.690391	0.414181	0.678742	0.967429	-1.69409	0.827307	-2.04771	0.0405882	NaN	BVES-AS1
ENSG00000018236	-2.49627	0.866798	-2.87987	0.00397834	0.044641	-0.807649	0.462512	-1.74622	0.0807727	0.637861	-3.24913	0.936413	-3.46977	0.000520909	0.00577257	CNTN1
ENSG00000149948	2.94873	1.02377	2.88027	0.00397336	0.044641	4.42528	1.82708	2.42204	0.0154335	NaN	7.44208	1.50451	4.94651	7.55565e-07	3.59288e-05	HMGA2
ENSG00000125877	0.840134	0.291688	2.88025	0.00397359	0.044641	0.208648	0.368485	0.566231	0.571236	0.94808	1.09648	0.320032	3.42616	0.000612189	0.00656343	ITPA
ENSG00000144645	1.32004	0.458371	2.87984	0.00397873	0.044641	0.253826	0.587962	0.431704	0.665956	0.966563	1.61528	0.598281	2.69987	0.00693658	0.0392756	OSBPL10
ENSG00000132383	0.976323	0.339025	2.87979	0.00397935	0.044641	-0.580683	0.407512	-1.42495	0.154173	0.747175	0.442244	0.402636	1.09837	0.272042	0.502062	RPA1
ENSG00000140479	-3.45896	1.20136	-2.87921	0.00398675	0.0446654	-0.499407	0.966469	-0.516734	0.605342	0.955868	-3.91408	1.16473	-3.36051	0.000777997	0.00783106	PCSK6
ENSG00000101236	1.13341	0.393646	2.87926	0.00398606	0.0446654	-0.511969	0.431574	-1.18628	0.235511	0.823548	0.67288	0.365655	1.8402	0.0657381	0.198054	RNF24
ENSG00000151948	-3.51561	1.22139	-2.87837	0.00399742	0.0447591	-0.129716	1.08746	-0.119283	0.905051	0.991758	-3.59534	1.06156	-3.38684	0.000707029	0.00728188	GLT1D1
ENSG00000166352	-1.23878	0.430498	-2.87754	0.00400785	0.04485	-0.267116	0.457163	-0.584289	0.559026	0.946089	-1.46579	0.416765	-3.51706	0.000436358	0.00504928	C11orf74
ENSG00000138207	-3.46851	1.20557	-2.87707	0.00401386	0.0448913	0.362326	1.12363	0.322461	0.747103	0.978119	-3.05611	1.07912	-2.83204	0.00462528	0.0292771	RBP4
ENSG00000171421	1.5527	0.539734	2.87679	0.0040174	0.0449042	-1.29655	0.622573	-2.08257	0.0372901	0.516281	0.313323	0.414766	0.755422	0.449996	0.672987	MRPL36
ENSG00000201315	1.78937	0.62204	2.87662	0.00401965	0.0449042	0.40762	1.05249	0.387291	0.698541	NaN	2.25442	0.74759	3.01559	0.00256484	0.0189742	RN7SKP227
ENSG00000177234	-1.74338	0.606139	-2.8762	0.0040249	0.044937	-1.00391	0.5996	-1.6743	0.094072	0.666663	-2.70241	0.686854	-3.93447	8.33795e-05	0.00144001	LINC01561
ENSG00000286140	1.34331	0.467152	2.87554	0.00403342	0.0450062	-1.01845	0.513485	-1.9834	0.0473224	0.554713	0.361183	0.369163	0.978384	0.327885	0.56058	DERPC
ENSG00000150779	1.07543	0.374019	2.87534	0.00403587	0.0450076	-0.490867	0.445611	-1.10156	0.270653	0.844452	0.626669	0.367507	1.70519	0.0881589	0.242168	TIMM8B
ENSG00000109099	1.49992	0.521785	2.87459	0.00404552	0.0450893	0.110029	0.504986	0.217886	0.827518	0.985231	1.65755	0.588471	2.81671	0.00485189	0.0303021	PMP22
ENSG00000128709	-3.34646	1.16466	-2.87332	0.00406176	0.045223	9.03755	1.50676	5.998	1.99768e-09	6.66292e-06	5.71262	2.21911	2.57429	0.0100446	NaN	HOXD9
ENSG00000090534	-2.8568	0.994261	-2.87329	0.00406219	0.045223	-0.304976	0.824017	-0.370108	0.711302	0.971975	-3.11942	0.92482	-3.373	0.000743528	0.00755624	THPO
ENSG00000063660	1.49814	0.521601	2.87219	0.00407635	0.0453355	-0.0348772	0.504211	-0.0691719	0.944853	0.994738	1.50605	0.478168	3.14963	0.00163479	0.01351	GPC1
ENSG00000049541	0.891911	0.310538	2.87214	0.00407697	0.0453355	0.332238	0.411928	0.806545	0.419928	0.906315	1.26973	0.387614	3.27577	0.00105376	0.00977847	RFC2
ENSG00000275212	-3.1561	1.09899	-2.87182	0.0040811	0.0453555	3.0696	1.38967	2.20886	0.0271843	0.457922	-0.0694979	1.94789	-0.0356786	0.971539	NaN	LINC02826
ENSG00000184557	2.18705	0.761625	2.87156	0.00408453	0.0453676	3.3169	0.551506	6.01426	1.80708e-09	6.66292e-06	5.5473	0.879131	6.30998	2.79076e-10	4.40895e-08	SOCS3
ENSG00000109118	0.750746	0.261459	2.87137	0.00408696	0.0453686	-0.36147	0.309949	-1.16622	0.243524	0.82895	0.434856	0.280128	1.55235	0.120579	0.298419	PHF12
ENSG00000280800	3.90812	1.36149	2.87047	0.00409863	0.045472	-1.78062	2.10794	-0.84472	0.398267	NaN	2.19738	2.61008	0.841885	0.399852	0.629826	FP671120.6
ENSG00000143977	1.54228	0.537335	2.87025	0.00410152	0.0454781	-0.628146	0.681445	-0.921785	0.356641	0.883039	0.963142	0.547813	1.75816	0.0787207	0.223838	SNRPG
ENSG00000103174	-1.33187	0.46412	-2.86967	0.00410897	0.0455346	0.453339	0.621188	0.729793	0.465517	0.925346	-0.83912	0.592718	-1.41571	0.156859	0.35503	NAGPA
ENSG00000287583	-3.8722	1.3498	-2.86873	0.00412125	0.0456446	-0.366357	1.1307	-0.324009	0.745931	0.977888	-4.19591	1.39385	-3.01031	0.0026098	0.0192547	AC018685.3
ENSG00000169402	-2.94201	1.02632	-2.86656	0.0041496	0.0459324	2.15552	0.985601	2.18701	0.0287417	0.469314	-0.778658	1.15697	-0.673014	0.500938	NaN	RSPH10B2
ENSG00000137310	1.4944	0.521399	2.86613	0.0041552	0.0459681	0.108853	0.58961	0.184618	0.853528	0.98813	1.64513	0.562223	2.92611	0.0034323	0.0235225	TCF19
ENSG00000204172	-2.15151	0.750775	-2.86572	0.00416056	0.0460011	0.749313	0.508623	1.47322	0.140692	0.730166	-1.36653	0.834053	-1.63842	0.101333	0.265426	AGAP9
ENSG00000163689	-2.60202	0.90833	-2.86462	0.0041751	0.0460646	0.839972	0.89151	0.94219	0.346095	0.880767	-1.75756	1.26771	-1.38641	0.165622	NaN	C3orf67
ENSG00000067191	-1.49344	0.521402	-2.86428	0.00417961	0.0460646	-0.243062	0.631887	-0.38466	0.700489	0.971327	-1.69004	0.526359	-3.21082	0.00132358	0.0116223	CACNB1
ENSG00000260230	-2.68478	0.937167	-2.86479	0.00417287	0.0460646	-0.606101	0.853638	-0.710021	0.477691	0.926578	-3.23732	0.86872	-3.72654	0.00019413	0.00276526	FRRS1L
ENSG00000119669	1.53669	0.536429	2.86467	0.0041745	0.0460646	-0.691276	0.506059	-1.366	0.171939	0.765269	0.900228	0.490485	1.83538	0.066449	0.199535	IRF2BPL
ENSG00000165379	-3.98721	1.39199	-2.86439	0.00417809	0.0460646	-0.295769	1.25791	-0.235127	0.81411	0.984454	-4.23202	1.13801	-3.71878	0.00020019	0.00282415	LRFN5
ENSG00000137103	-1.09015	0.38061	-2.86421	0.00418056	0.0460646	-0.398348	0.344039	-1.15786	0.246923	0.83217	-1.4438	0.417583	-3.45751	0.000545183	0.0059895	TMEM8B
ENSG00000136144	-0.92566	0.323265	-2.86347	0.00419032	0.0461459	-0.0989609	0.375724	-0.263387	0.792252	0.983322	-0.975645	0.368943	-2.64443	0.00818281	0.044468	RCBTB1
ENSG00000067606	-2.48506	0.868772	-2.86043	0.0042307	0.0465641	-0.348112	0.786666	-0.442516	0.658116	0.966324	-2.77306	0.789492	-3.51246	0.000443971	0.00510647	PRKCZ
ENSG00000261594	-4.17904	1.46127	-2.85988	0.00423808	0.0466188	0.000919957	1.29933	0.000708025	0.999435	0.99991	-4.11504	1.44982	-2.83831	0.00453538	0.0289176	TPBGL
ENSG00000117362	0.831098	0.290719	2.85877	0.00425287	0.0466756	-0.39419	0.445004	-0.885813	0.375718	0.892172	0.485213	0.416187	1.16585	0.243674	0.470845	APH1A
ENSG00000187715	-2.41763	0.845544	-2.85926	0.00424625	0.0466756	0.576092	0.702414	0.820161	0.412124	0.903885	-1.7871	1.00604	-1.77636	0.0756735	0.218219	KBTBD12
ENSG00000078114	-2.12814	0.744421	-2.85879	0.00425263	0.0466756	-0.917056	0.658268	-1.39313	0.163579	0.758728	-2.98642	0.698017	-4.27843	1.88213e-05	0.000435578	NEBL
ENSG00000204970	-2.31335	0.80914	-2.85903	0.00424939	0.0466756	-1.2819	0.609022	-2.10485	0.0353047	0.509052	-3.5199	0.66807	-5.26876	1.37345e-07	8.86555e-06	PCDHA1
ENSG00000180113	-1.61546	0.565207	-2.85818	0.00426073	0.0467354	0.933974	0.657891	1.41965	0.15571	0.751029	-0.645471	0.656126	-0.98376	0.325234	0.557583	TDRD6
ENSG00000233178	-1.36685	0.478381	-2.85724	0.00427348	0.0468488	0.24878	0.524655	0.47418	0.635372	0.962186	-1.07526	0.581448	-1.84929	0.0644165	0.195267	AL161457.2
ENSG00000196411	1.26149	0.441838	2.8551	0.00430226	0.047111	0.680551	0.57511	1.18334	0.236674	0.82499	1.98511	0.468093	4.24085	2.22672e-05	0.000499601	EPHB4
ENSG00000162783	1.27135	0.445278	2.85518	0.00430131	0.047111	-0.233789	0.494686	-0.472601	0.636498	0.962186	1.08847	0.305695	3.56064	0.000369951	0.00448445	IER5
ENSG00000157240	0.80598	0.282385	2.85419	0.00431467	0.0471971	0.0655391	0.38129	0.171888	0.863526	0.990467	0.916408	0.325563	2.81484	0.00488016	0.0304369	FZD1
ENSG00000110492	1.87178	0.655837	2.85403	0.00431688	0.0471971	1.03551	0.730105	1.4183	0.156103	0.751489	2.94842	0.648327	4.54774	5.42261e-06	0.000163242	MDK
ENSG00000282164	-1.43016	0.50111	-2.85399	0.00431744	0.0471971	0.0810797	0.616692	0.131475	0.895399	0.991461	-1.30184	0.464051	-2.80538	0.00502573	0.0310422	PEG13
ENSG00000285564	-2.05485	0.720173	-2.85326	0.00432725	0.0472446	0.32836	0.534754	0.614039	0.53919	0.943157	-1.6858	0.770766	-2.18718	0.0287296	0.111421	AL031121.2
ENSG00000177045	1.3216	0.463161	2.85343	0.00432502	0.0472446	0.214491	0.452881	0.473614	0.635775	0.962186	1.5831	0.545357	2.90286	0.0036977	0.0247844	SIX5
ENSG00000214198	-2.44464	0.856829	-2.85313	0.00432909	0.0472446	0.465463	0.855244	0.544245	0.586273	0.950592	-1.95524	0.799197	-2.44651	0.0144247	0.0679168	TTC41P
ENSG00000105810	1.7988	0.63059	2.85257	0.00433675	0.0472484	1.81942	0.638723	2.84853	0.00439222	0.186223	3.67298	0.483514	7.59644	3.04395e-14	1.53126e-11	CDK6
ENSG00000168993	-3.02425	1.0601	-2.85281	0.00433349	0.0472484	-0.672721	1.00859	-0.666993	0.504777	0.933748	-3.63739	0.767489	-4.73934	2.14413e-06	8.06833e-05	CPLX1
ENSG00000200243	1.74982	0.613403	2.85264	0.0043358	0.0472484	-0.282674	0.659687	-0.428496	0.66829	0.966563	1.51779	0.676619	2.24319	0.0248845	0.100526	RN7SKP79
ENSG00000254536	-1.03536	0.363159	-2.85097	0.00435855	0.0474593	0.779353	0.474064	1.64398	0.10018	0.673996	-0.211474	0.433096	-0.488286	0.625348	0.796502	AL360181.3
ENSG00000138435	2.36975	0.831524	2.84989	0.00437345	0.047568	1.91307	1.38483	1.38145	0.167141	0.761664	4.38887	0.956921	4.58645	4.50855e-06	0.000141288	CHRNA1
ENSG00000170801	2.37274	0.832545	2.84999	0.00437209	0.047568	1.39893	1.10598	1.26488	0.205914	NaN	3.80078	1.06289	3.5759	0.000349024	0.00431561	HTRA3
ENSG00000256443	-3.00938	1.05617	-2.84932	0.00438131	0.0476001	-0.193441	1.1694	-0.165419	0.868614	0.990467	-3.15491	1.12177	-2.81244	0.00491678	0.0305692	AP003559.1
ENSG00000199883	1.72533	0.605505	2.84941	0.0043801	0.0476001	-0.502272	0.731947	-0.686214	0.492578	0.930835	1.27233	0.608927	2.08946	0.0366666	0.131751	RN7SKP90
ENSG00000143473	-3.42928	1.20403	-2.84817	0.00439717	0.0477456	-0.2782	0.932106	-0.298464	0.765349	0.982232	-3.657	1.14873	-3.18351	0.00145501	0.012431	KCNH1
ENSG00000128791	1.15413	0.405249	2.84795	0.00440016	0.0477513	-0.140598	0.489471	-0.287244	0.773925	0.982232	1.05739	0.45443	2.32686	0.0199729	0.086322	TWSG1
ENSG00000138160	1.68316	0.591138	2.84733	0.00440879	0.0478182	-0.0985806	0.621638	-0.158582	0.873998	0.990635	1.62572	0.597828	2.71937	0.00654061	0.0375909	KIF11
ENSG00000173852	1.38243	0.485613	2.84678	0.00441643	0.0478743	0.385665	0.516776	0.74629	0.455492	0.920933	1.82317	0.403831	4.51467	6.34143e-06	0.000184562	DPY19L1
ENSG00000172568	-3.15418	1.10808	-2.84653	0.00441992	0.0478853	0.400808	0.994264	0.403121	0.686859	0.968594	-2.70328	1.02517	-2.63691	0.0083666	0.045282	FNDC9
ENSG00000214655	-0.984476	0.346067	-2.84476	0.00444453	0.048125	0.144446	0.394943	0.365738	0.714561	0.973099	-0.798312	0.365943	-2.18152	0.0291449	0.11253	ZSWIM8
ENSG00000164076	-3.20249	1.12592	-2.84433	0.00445049	0.0481427	-0.159581	0.998865	-0.159762	0.873068	0.990467	-3.30992	1.07874	-3.06833	0.00215262	0.0165925	CAMKV
ENSG00000142528	1.12141	0.394267	2.84428	0.00445113	0.0481427	0.472913	0.405442	1.16641	0.243448	0.82895	1.6358	0.422637	3.87048	0.000108623	0.00176718	ZNF473
ENSG00000273297	-3.42691	1.2054	-2.84296	0.00446974	0.0482901	1.59162	0.981197	1.62212	0.104778	0.679761	-1.80012	1.37227	-1.31179	0.189591	NaN	AC009275.1
ENSG00000085840	1.94211	0.683104	2.84306	0.00446821	0.0482901	1.556	0.804272	1.93467	0.0530306	0.571938	3.53218	0.672102	5.25542	1.47686e-07	9.44201e-06	ORC1
ENSG00000105699	-1.78348	0.62755	-2.84198	0.00448346	0.0483846	-0.682871	0.705334	-0.968153	0.332968	0.874454	-2.4092	0.605913	-3.97614	7.00416e-05	0.00125838	LSR
ENSG00000179051	1.16986	0.411686	2.84162	0.00448847	0.0483846	0.115047	0.35428	0.324734	0.745383	0.977694	1.33053	0.45913	2.89793	0.0037563	0.0250368	RCC2
ENSG00000136270	1.08406	0.381475	2.84175	0.00448673	0.0483846	-0.0204756	0.484168	-0.0422904	0.966267	0.996983	1.10709	0.45014	2.45943	0.0139159	0.066186	TBRG4
ENSG00000118369	-1.10461	0.388704	-2.84178	0.0044863	0.0483846	0.618432	0.450835	1.37175	0.170142	0.765119	-0.450417	0.344219	-1.30852	0.190697	0.402314	USP35
ENSG00000120053	-2.30316	0.810911	-2.84021	0.00450841	0.0485725	-0.455143	0.871327	-0.522355	0.601423	0.955559	-2.69953	0.500992	-5.38836	7.11037e-08	5.05286e-06	GOT1
ENSG00000165309	-3.58124	1.26127	-2.83938	0.0045201	0.0485904	3.01269	1.13425	2.65612	0.00790454	0.254417	-0.552949	1.41739	-0.390118	0.696449	NaN	ARMC3
ENSG00000176058	-1.22954	0.432972	-2.83976	0.0045147	0.0485904	0.0492975	0.504692	0.0976784	0.922188	0.993263	-1.1336	0.317466	-3.57078	0.000355923	0.00435584	TPRN
ENSG00000153443	-1.09941	0.387163	-2.83967	0.004516	0.0485904	-0.117565	0.4362	-0.269521	0.787529	0.983129	-1.1712	0.384824	-3.04347	0.00233863	0.0176565	UBALD1
ENSG00000006611	-2.51232	0.884757	-2.83956	0.00451761	0.0485904	-0.855048	0.6128	-1.39531	0.162921	0.758728	-3.32451	0.946402	-3.51279	0.000443435	0.00510338	USH1C
ENSG00000101180	-3.56542	1.25624	-2.83816	0.0045374	0.0487224	-0.90398	1.08867	-0.830356	0.406338	0.903228	-4.39701	1.02265	-4.29962	1.71094e-05	0.000405284	HRH3
ENSG00000119139	-1.60602	0.565841	-2.83829	0.00453561	0.0487224	-0.985146	0.670452	-1.46938	0.141731	0.731986	-2.5443	0.735719	-3.45825	0.000543694	0.00597657	TJP2
ENSG00000172901	2.19841	0.774645	2.83795	0.00454036	0.0487272	0.884574	1.18485	0.746572	0.455322	NaN	3.07713	1.09019	2.82255	0.00476431	0.0298899	LVRN
ENSG00000273382	-1.71577	0.604957	-2.83619	0.00456549	0.0489698	1.17644	0.624204	1.8847	0.0594698	0.589885	-0.500844	0.626074	-0.799975	0.423725	0.650433	AL356488.3
ENSG00000165521	-1.93388	0.681951	-2.8358	0.00457108	0.0489755	-0.173204	0.608192	-0.284785	0.775809	0.982232	-2.06115	0.703195	-2.93112	0.00337746	0.0232326	EML5
ENSG00000131018	-1.14549	0.40394	-2.8358	0.00457104	0.0489755	0.099638	0.400406	0.248843	0.803483	0.984287	-0.999838	0.408268	-2.44897	0.0143264	0.0676206	SYNE1
ENSG00000112742	2.38077	0.839661	2.83539	0.00457695	0.0490113	1.3002	0.920859	1.41195	0.157966	0.753274	3.74105	0.764292	4.89479	9.84084e-07	4.35457e-05	TTK
ENSG00000117528	0.881932	0.311213	2.83386	0.00459902	0.0491348	-0.143511	0.41173	-0.348555	0.727423	0.974697	0.783007	0.388325	2.01637	0.0437613	0.148983	ABCD3
ENSG00000286288	-1.99073	0.702376	-2.83428	0.00459286	0.0491348	0.522058	0.66715	0.78252	0.433909	0.912524	-1.41848	0.851131	-1.66659	0.0955967	0.255656	AL109809.5
ENSG00000084207	0.986274	0.348051	2.83371	0.00460116	0.0491348	-0.669458	0.54399	-1.23065	0.218456	0.808188	0.362052	0.511358	0.70802	0.478933	0.694055	GSTP1
ENSG00000169228	-0.816276	0.288021	-2.83408	0.00459573	0.0491348	0.0817108	0.363984	0.22449	0.822376	0.98447	-0.694601	0.33605	-2.06696	0.0387383	0.137235	RAB24
ENSG00000161016	0.983308	0.346991	2.83382	0.00459957	0.0491348	-0.38579	0.444199	-0.868507	0.385117	0.896605	0.650096	0.393149	1.65356	0.0982166	0.260079	RPL8
ENSG00000136492	1.8215	0.642942	2.83307	0.00461037	0.0491678	1.01476	0.720879	1.40767	0.15923	0.754679	2.87032	0.712518	4.02842	5.61532e-05	0.00105113	BRIP1
ENSG00000172889	-1.611	0.568595	-2.8333	0.00460707	0.0491678	0.405781	0.583936	0.694907	0.487114	0.929149	-1.15619	0.534327	-2.16383	0.0304777	0.116174	EGFL7
ENSG00000123999	-2.08733	0.736847	-2.83279	0.00461442	0.0491678	0.623783	0.710966	0.877373	0.380284	0.894446	-1.44759	0.891149	-1.6244	0.10429	0.270628	INHA
ENSG00000168297	-1.38272	0.488144	-2.83261	0.00461693	0.0491678	0.387819	0.546058	0.710216	0.47757	0.926578	-0.951623	0.369852	-2.57298	0.0100826	0.0518812	PXK
ENSG00000113615	1.07888	0.380873	2.83266	0.00461623	0.0491678	-0.550539	0.443477	-1.24142	0.214452	0.804307	0.575767	0.410185	1.40368	0.160415	0.35996	SEC24A
ENSG00000105649	-2.69806	0.95268	-2.83208	0.00462468	0.0492232	-0.471971	1.01719	-0.463994	0.642652	0.96361	-3.11335	0.656838	-4.73991	2.13818e-06	8.06833e-05	RAB3A
ENSG00000108684	-4.02562	1.42187	-2.83122	0.00463706	0.0492822	-0.384017	1.25543	-0.305884	0.759693	0.981597	-4.35802	1.02861	-4.2368	2.26729e-05	0.000504557	ASIC2
ENSG00000175662	-0.86703	0.306245	-2.83117	0.00463785	0.0492822	-0.554169	0.39473	-1.40392	0.160343	0.75623	-1.37111	0.299889	-4.57207	4.82925e-06	0.000148657	TOM1L2
ENSG00000114812	-3.18452	1.12468	-2.83149	0.00463315	0.0492822	-0.317798	1.18313	-0.268607	0.788232	0.983129	-3.45656	0.997517	-3.46516	0.000529912	0.00585876	VIPR1
ENSG00000066117	1.00785	0.356023	2.83086	0.00464225	0.049302	-0.17392	0.40625	-0.428111	0.66857	0.966563	0.874566	0.365018	2.39595	0.0165773	0.0755584	SMARCD1
ENSG00000280234	-2.39236	0.845279	-2.83026	0.00465096	0.0493367	0.239421	0.966909	0.247615	0.804432	0.984287	-2.10778	0.898277	-2.34647	0.0189521	0.0831318	AC124303.1
ENSG00000242247	0.846742	0.299183	2.83018	0.00465223	0.0493367	-0.337628	0.392542	-0.860107	0.38973	0.898541	0.557467	0.324484	1.71801	0.085794	0.237274	ARFGAP3
ENSG00000150593	-1.51892	0.536698	-2.83011	0.00465316	0.0493367	0.0501752	0.438036	0.114546	0.908805	0.992092	-1.42246	0.555202	-2.56205	0.0104056	0.0531284	PDCD4
ENSG00000136828	-1.1859	0.419143	-2.82934	0.00466447	0.0494296	0.031948	0.417644	0.0764956	0.939025	0.994037	-1.10956	0.419989	-2.64187	0.00824485	0.0447752	RALGPS1
ENSG00000116731	-1.03037	0.364354	-2.82794	0.00468482	0.0496181	0.312834	0.527344	0.593225	0.55303	0.946089	-0.676203	0.500482	-1.3511	0.176662	0.383672	PRDM2
ENSG00000132661	1.19061	0.421118	2.82725	0.00469494	0.0496982	0.0449865	0.541	0.0831544	0.933729	0.993739	1.27492	0.376639	3.38499	0.000711799	0.00731545	NXT1
ENSG00000200795	1.95036	0.690021	2.82653	0.00470556	0.0497834	-0.0300856	0.655951	-0.0458656	0.963417	0.99679	1.95752	0.601446	3.25469	0.00113518	0.0103619	RNU4-1
ENSG00000136717	-1.6393	0.580066	-2.82606	0.00471248	0.0498294	0.242579	0.579527	0.418581	0.675522	0.967176	-1.35428	0.516428	-2.62239	0.00873153	0.0468416	BIN1
ENSG00000072858	-2.27038	0.803427	-2.82586	0.00471534	0.0498325	-0.5432	0.663383	-0.818833	0.412882	0.904165	-2.75426	0.739832	-3.72282	0.000197009	0.00280079	SIDT1
ENSG00000114656	-2.01834	0.714525	-2.82474	0.00473195	0.0499808	0.266328	0.951102	0.28002	0.779462	0.982232	-1.7233	0.94259	-1.82826	0.0675103	0.201774	KIAA1257
ENSG00000151532	-1.30664	0.462625	-2.8244	0.00473691	0.0500058	-0.0142964	0.533354	-0.0268047	0.978616	0.998081	-1.27199	0.357995	-3.55309	0.00038074	0.00458039	VTI1A
ENSG00000114346	1.6677	0.590665	2.82343	0.00475128	0.0500862	0.216441	0.647513	0.334266	0.738179	0.977038	1.93297	0.67474	2.86477	0.00417317	0.0272035	ECT2
ENSG00000262188	-4.36022	1.54424	-2.82354	0.00474961	0.0500862	1.74305	1.16912	1.49091	0.135984	0.723037	-2.55304	1.56885	-1.62733	0.103667	NaN	LINC01978
ENSG00000113555	2.18527	0.774019	2.82328	0.00475347	0.0500862	-0.00848646	0.587942	-0.0144342	0.988484	0.999574	2.22084	0.878725	2.52734	0.0114929	0.0568429	PCDH12
ENSG00000204152	-0.916018	0.324462	-2.82319	0.00475485	0.0500862	0.0581456	0.351572	0.165388	0.868639	0.990467	-0.815367	0.371274	-2.19613	0.0280824	0.10987	TIMM23B
ENSG00000166573	2.94901	1.0447	2.82283	0.00476013	0.0501145	0.204217	0.661962	0.308502	0.7577	0.981049	3.19975	1.15661	2.7665	0.00566623	0.0337537	GALR1
ENSG00000151929	-1.42054	0.50333	-2.82228	0.00476841	0.0501744	0.351484	0.594646	0.59108	0.554467	0.946089	-1.02776	0.487257	-2.10928	0.0349202	0.127514	BAG3
ENSG00000279189	-2.21118	0.783543	-2.82203	0.00477205	0.0501855	0.568267	0.77107	0.736985	0.461131	0.92411	-1.60663	0.944187	-1.7016	0.0888296	0.243408	AP003972.1
ENSG00000186073	1.25651	0.445287	2.82181	0.00477535	0.0501929	-0.114454	0.512436	-0.223353	0.823261	0.984629	1.18612	0.419058	2.83043	0.00464853	0.0293951	C15orf41
ENSG00000167775	1.1976	0.424453	2.82152	0.00477972	0.0502117	-0.246136	0.498647	-0.493607	0.621584	0.958084	0.993384	0.448979	2.21254	0.0269294	0.106669	CD320
ENSG00000259488	1.50093	0.532018	2.8212	0.00478436	0.0502332	-0.581007	0.646131	-0.899209	0.368541	0.88995	0.962835	0.528719	1.82107	0.0685963	0.204091	AC023355.1
ENSG00000139644	0.947268	0.335949	2.81968	0.00480722	0.0504458	-1.04418	0.471019	-2.21686	0.0266328	0.45437	-0.0436664	0.484495	-0.0901276	0.928186	0.966721	TMBIM6
ENSG00000188282	-2.77696	0.985022	-2.81919	0.00481449	0.0504948	2.31575	0.815098	2.84106	0.00449633	0.188639	-0.505135	1.24185	-0.40676	0.684184	NaN	RUFY4
ENSG00000226053	3.24513	1.15137	2.81849	0.00482506	0.0505237	-2.39377	1.09664	-2.18281	0.0290498	NaN	0.905857	1.01907	0.888908	0.374053	0.605914	LINC01776
ENSG00000060140	-3.86786	1.37227	-2.81857	0.00482379	0.0505237	-0.84015	1.16051	-0.72395	0.469097	0.92574	-4.66546	1.19333	-3.90962	9.2443e-05	0.00156041	STYK1
ENSG00000135111	-2.12902	0.755324	-2.81869	0.00482202	0.0505237	0.776	0.628852	1.23399	0.217205	0.807422	-1.29942	0.748655	-1.73568	0.0826212	0.231141	TBX3
ENSG00000167470	1.02947	0.365294	2.81819	0.0048296	0.0505439	-0.142768	0.481359	-0.296594	0.766776	0.982232	0.934481	0.482022	1.93867	0.0525418	0.169403	MIDN
ENSG00000197360	-3.11712	1.10653	-2.81702	0.00484714	0.0507001	0.182545	0.690816	0.264246	0.791591	0.983322	-2.89642	1.1693	-2.47706	0.0132471	0.063754	ZNF98
ENSG00000125107	0.773308	0.274597	2.81616	0.0048602	0.0508033	-0.386257	0.343523	-1.1244	0.260843	0.841922	0.43687	0.273899	1.595	0.110711	0.281581	CNOT1
ENSG00000164764	-4.0105	1.42417	-2.81602	0.00486225	0.0508033	4.35684	1.50918	2.8869	0.00389062	0.174928	0.357817	1.86689	0.191665	0.848005	NaN	SBSPON
ENSG00000104899	-2.19471	0.77949	-2.81557	0.00486912	0.0508477	1.08365	0.816429	1.3273	0.184409	0.776597	-1.0757	0.651285	-1.65166	0.0986044	0.260765	AMH
ENSG00000151240	-0.946715	0.336267	-2.81537	0.00487213	0.0508517	-0.39134	0.375521	-1.04213	0.297353	0.856212	-1.2903	0.32531	-3.96638	7.2973e-05	0.0012963	DIP2C
ENSG00000205730	1.219	0.433061	2.81484	0.00488011	0.0509076	0.364992	0.514978	0.708753	0.478478	0.926661	1.62984	0.427209	3.81508	0.000136137	0.00210787	ITPRIPL2
ENSG00000286025	-2.74163	0.974488	-2.81341	0.00490198	0.0509711	-0.47231	0.921832	-0.51236	0.608399	0.956144	-3.15635	1.1257	-2.80389	0.00504895	0.031114	AC000095.3
ENSG00000103351	-0.920648	0.327209	-2.81364	0.00489838	0.0509711	0.521921	0.45973	1.13528	0.25626	0.838501	-0.358683	0.405855	-0.88377	0.376821	0.608234	CLUAP1
ENSG00000112319	2.96128	1.05234	2.81399	0.00489308	0.0509711	1.23989	0.81969	1.51263	0.130374	0.713242	4.25048	1.09746	3.87303	0.00010749	0.00175623	EYA4
ENSG00000139620	0.945371	0.33601	2.81352	0.0049002	0.0509711	-0.347656	0.379737	-0.915517	0.359921	0.884012	0.645561	0.398724	1.61907	0.105432	0.272358	KANSL2
ENSG00000229921	-3.10157	1.10224	-2.81387	0.00489486	0.0509711	2.05034	1.06203	1.9306	0.0535327	0.572261	-1.03434	1.65318	-0.625671	0.531531	NaN	KIF25-AS1
ENSG00000101871	0.944558	0.335702	2.81368	0.00489773	0.0509711	-0.204019	0.494205	-0.412823	0.679736	0.967491	0.785365	0.442924	1.77314	0.0762059	0.219027	MID1
ENSG00000280046	-1.51459	0.538406	-2.8131	0.00490661	0.0509897	0.331833	0.640036	0.518459	0.604138	0.955795	-1.13929	0.70428	-1.61767	0.105734	0.272843	AC104581.4
ENSG00000116670	1.38635	0.492846	2.81294	0.00490903	0.0509897	0.160788	0.467216	0.34414	0.730741	0.975436	1.59022	0.474727	3.34975	0.000808846	0.00804051	MAD2L2
ENSG00000094804	1.48589	0.528484	2.81161	0.00492946	0.0511745	0.694733	0.691318	1.00494	0.314925	0.867106	2.2079	0.690528	3.19741	0.00138669	0.0120108	CDC6
ENSG00000123219	2.12777	0.756958	2.81095	0.00493954	0.0512517	1.60419	0.822254	1.95097	0.0510604	0.564529	3.77	0.85619	4.40323	1.06652e-05	0.000275881	CENPK
ENSG00000083535	1.37897	0.490641	2.81054	0.00494588	0.05129	-0.251761	0.557843	-0.451311	0.651765	0.964354	1.16652	0.549181	2.1241	0.0336616	0.124324	PIBF1
ENSG00000238917	2.15673	0.76793	2.8085	0.0049773	0.0515871	0.0791213	0.707566	0.111822	0.910965	0.992092	2.27474	0.741728	3.06681	0.00216358	0.0166368	SNORD10
ENSG00000173991	-1.64094	0.584312	-2.80833	0.00497985	0.0515871	0.303159	0.554298	0.546925	0.58443	0.950592	-1.2973	0.544115	-2.38424	0.0171143	0.0773421	TCAP
ENSG00000142694	1.49939	0.533979	2.80795	0.00498582	0.0515938	0.856035	0.63927	1.33908	0.180544	0.774297	2.39371	0.471043	5.08171	3.74047e-07	2.08463e-05	EVA1B
ENSG00000165389	1.0017	0.356724	2.80805	0.00498425	0.0515938	-0.878687	0.532193	-1.65107	0.0987247	0.673996	0.180895	0.471001	0.384066	0.70093	0.845575	SPTSSA
ENSG00000233930	-2.72912	0.972186	-2.80719	0.0049975	0.0516871	-0.251334	0.837184	-0.300213	0.764015	0.982232	-2.93799	1.13053	-2.59878	0.00935554	0.0492945	KRTAP5-AS1
ENSG00000187678	2.06155	0.734547	2.80656	0.00500736	0.0517615	0.772188	0.82388	0.937257	0.348626	0.881525	2.89061	0.755838	3.82438	0.0001311	0.00204914	SPRY4
ENSG00000145990	-2.35512	0.839391	-2.80575	0.00501995	0.051838	0.199838	0.88169	0.226653	0.820694	0.984454	-2.10351	0.711912	-2.95473	0.00312941	0.0219691	GFOD1
ENSG00000055955	-2.20488	0.785845	-2.80574	0.00502011	0.051838	1.09115	0.73438	1.48581	0.13733	0.724469	-1.08208	0.928525	-1.16537	0.243868	0.471078	ITIH4
ENSG00000188820	3.20284	1.14167	2.80539	0.00502563	0.0518673	-2.12202	1.27855	-1.65971	0.0969731	NaN	1.08931	1.19303	0.913059	0.361212	0.593921	CALHM6
ENSG00000186212	-3.49241	1.24504	-2.80507	0.00503053	0.0518902	-0.296531	1.28811	-0.230206	0.817932	0.984454	-3.7473	0.953042	-3.93193	8.42664e-05	0.00144859	SOWAHB
ENSG00000187902	-2.35452	0.839541	-2.80453	0.00503893	0.0519492	-0.698376	0.707543	-0.987044	0.323621	0.869541	-2.99914	0.844258	-3.55239	0.000381746	0.00458791	SHISA7
ENSG00000165304	2.09865	0.748408	2.80416	0.00504484	0.0519826	1.94199	0.942428	2.06063	0.0393388	0.521586	4.05974	0.712634	5.69682	1.22064e-08	1.14381e-06	MELK
ENSG00000172361	-2.14534	0.765184	-2.80369	0.00505209	0.0520296	1.42954	0.849638	1.68253	0.0924661	0.666582	-0.680044	0.749779	-0.906992	0.364411	NaN	CFAP53
ENSG00000007516	-1.96765	0.702137	-2.80238	0.00507278	0.0522149	0.973812	0.843565	1.1544	0.248336	0.833572	-0.96366	0.776428	-1.24115	0.214552	0.434008	BAIAP3
ENSG00000224888	-1.80344	0.643767	-2.80139	0.00508827	0.0523465	-0.228109	0.659409	-0.34593	0.729396	0.975436	-1.98841	0.740053	-2.68685	0.00721296	0.0404823	AC138028.2
ENSG00000141314	-1.64132	0.585984	-2.80096	0.00509504	0.0523883	-0.473519	0.625376	-0.757174	0.448945	0.916894	-2.07237	0.691235	-2.99807	0.00271697	0.0198159	RHBDL3
ENSG00000204843	-1.2757	0.455522	-2.80053	0.00510194	0.0524134	-0.0863227	0.474279	-0.182008	0.855576	0.988674	-1.31557	0.448227	-2.93505	0.00333497	0.0230149	DCTN1
ENSG00000102468	-3.0684	1.09567	-2.80047	0.00510288	0.0524134	-0.727618	1.05969	-0.686635	0.492313	0.930835	-3.74389	0.95211	-3.93221	8.41702e-05	0.00144824	HTR2A
ENSG00000248079	-1.81242	0.64742	-2.79945	0.00511897	0.0524504	0.145089	0.605979	0.239429	0.810773	0.984422	-1.61974	0.703465	-2.30252	0.0213056	0.090426	DPH6-DT
ENSG00000154721	0.893943	0.319336	2.79938	0.00512002	0.0524504	-1.2049	0.54628	-2.20565	0.0274085	0.460402	-0.262671	0.509876	-0.515166	0.606437	0.784299	JAM2
ENSG00000144460	-3.52558	1.25927	-2.79971	0.00511487	0.0524504	-0.47002	1.05018	-0.44756	0.654471	0.965759	-3.94812	1.10314	-3.57899	0.000344925	0.00428433	NYAP2
ENSG00000116132	1.75578	0.6272	2.79939	0.00511995	0.0524504	0.315676	0.664654	0.474948	0.634824	0.961978	2.11283	0.641869	3.29168	0.000995913	0.00940142	PRRX1
ENSG00000124226	0.984676	0.35171	2.79968	0.00511531	0.0524504	-0.180416	0.465457	-0.387611	0.698304	0.971313	0.851475	0.429617	1.98194	0.0474861	0.158034	RNF114
ENSG00000141542	-2.08776	0.746374	-2.7972	0.00515473	0.0527781	-0.157509	0.674254	-0.233605	0.815291	0.984454	-2.20431	0.744176	-2.96208	0.00305564	0.0216525	RAB40B
ENSG00000278975	-3.18806	1.14007	-2.79637	0.00516806	0.0528445	-0.0290983	1.22775	-0.0237005	0.981092	0.99881	-3.168	1.0785	-2.93742	NaN	NaN	AC007012.2
ENSG00000128951	1.03057	0.368548	2.79628	0.00516939	0.0528445	-1.1238	0.483394	-2.32482	0.0200816	0.399777	-0.0381621	0.395627	-0.0964598	0.923155	0.964266	DUT
ENSG00000114796	-1.57899	0.564667	-2.79633	0.00516872	0.0528445	-0.425088	0.615218	-0.690956	0.489593	0.930174	-1.94761	0.323932	-6.01242	1.82775e-09	2.28361e-07	KLHL24
ENSG00000232973	-2.24934	0.804545	-2.79579	0.00517735	0.052898	0.190119	0.914147	0.207974	0.835249	0.985687	-2.02154	0.946931	-2.13483	0.0327749	0.122166	CYP1B1-AS1
ENSG00000260838	-4.67677	1.67348	-2.79464	0.00519571	0.0530576	-0.147206	1.18441	-0.124286	0.901089	0.991758	-4.78886	1.44013	-3.32529	0.000883262	0.00860573	AC022893.2
ENSG00000199313	2.88322	1.03179	2.79438	0.00519999	0.0530733	-1.03791	1.22903	-0.844489	0.398396	NaN	1.88142	0.977188	1.92534	0.0541872	0.173073	RNU4-82P
ENSG00000137177	-0.841769	0.301409	-2.79278	0.00522575	0.0532702	-0.599633	0.388796	-1.54228	0.123005	0.701963	-1.39093	0.327392	-4.24851	2.15202e-05	0.000486264	KIF13A
ENSG00000203650	-1.85073	0.662752	-2.7925	0.00523028	0.0532702	2.08542	0.893805	2.3332	0.0196379	0.396964	0.26423	1.0101	0.261587	0.79364	0.900313	LINC01285
ENSG00000148948	-1.2269	0.439299	-2.79285	0.00522454	0.0532702	-0.494901	0.472372	-1.04769	0.29478	0.85608	-1.67031	0.37167	-4.49408	6.98714e-06	0.000197876	LRRC4C
ENSG00000095303	1.92302	0.688598	2.79266	0.00522773	0.0532702	0.990053	0.72331	1.36878	0.171068	0.765119	2.94997	0.511993	5.76174	8.32491e-09	8.28849e-07	PTGS1
ENSG00000087495	-3.05332	1.09383	-2.79139	0.00524816	0.0534242	-0.361773	0.431191	-0.839011	0.401463	0.901978	-3.36833	1.2179	-2.76569	0.0056802	0.0337948	PHACTR3
ENSG00000249715	-2.10445	0.754114	-2.79062	0.00526067	0.0535235	0.68845	0.874393	0.787347	0.431079	0.911822	-1.38521	1.04502	-1.32553	0.184995	0.394444	FER1L5
ENSG00000165449	-1.69123	0.606125	-2.79023	0.00526705	0.0535603	-0.719694	0.596302	-1.20693	0.22746	0.819098	-2.36472	0.726715	-3.25399	0.00113796	0.0103735	SLC16A9
ENSG00000152910	-3.4745	1.24551	-2.78963	0.00527691	0.0536324	-0.031386	0.951542	-0.0329844	0.973687	0.997418	-3.46191	1.18883	-2.91202	0.00359099	0.0242477	CNTNAP4
ENSG00000106100	2.24914	0.806316	2.78941	0.00528046	0.0536404	0.751513	0.52054	1.44372	0.148818	0.74204	3.03552	0.861823	3.5222	0.000427974	0.00498547	NOD1
ENSG00000090889	1.9647	0.704635	2.78826	0.00529922	0.0538028	1.35944	0.735052	1.84944	0.064394	0.607321	3.35326	0.652238	5.14116	2.73044e-07	1.6311e-05	KIF4A
ENSG00000161671	1.19233	0.427676	2.78794	0.00530449	0.0538281	-0.0649921	0.425497	-0.152744	0.8786	0.990789	1.17421	0.459591	2.5549	0.0106217	0.0539295	EMC10
ENSG00000129235	1.13145	0.405888	2.78759	0.00531012	0.053857	-0.71197	0.42681	-1.66812	0.0952917	0.666663	0.465885	0.474936	0.980943	0.326621	0.559354	TXNDC17
ENSG00000260121	-1.51698	0.544275	-2.78716	0.00531721	0.0539007	0.603069	0.709155	0.850405	0.3951	0.898983	-0.868156	0.772825	-1.12335	0.261287	0.490019	AC138028.4
ENSG00000197451	0.927055	0.332651	2.78687	0.00532199	0.053921	-0.217089	0.440531	-0.49279	0.622161	0.958401	0.757174	0.426824	1.77397	0.0760675	0.218855	HNRNPAB
ENSG00000077152	1.64934	0.591931	2.78637	0.0053302	0.053976	-0.305019	0.587695	-0.519009	0.603754	0.955795	1.39157	0.620827	2.24147	0.0249956	0.10089	UBE2T
ENSG00000232656	-3.01474	1.08204	-2.78616	0.00533369	0.0539831	0.165176	0.896836	0.184176	0.853875	0.98813	-2.82133	1.06189	-2.65689	0.00788656	NaN	IDI2-AS1
ENSG00000157514	-1.15533	0.414779	-2.78542	0.00534579	0.0540772	0.471792	0.52399	0.900384	0.367916	0.889219	-0.643912	0.476998	-1.34992	0.17704	0.383829	TSC22D3
ENSG00000184206	-1.49759	0.537889	-2.78419	0.00536617	0.0542551	0.527127	0.632604	0.833266	0.404695	0.902897	-0.934757	0.562661	-1.66131	0.0966505	0.257537	GOLGA6L4
ENSG00000260630	-1.67445	0.601498	-2.7838	0.0053726	0.0542636	-0.536476	0.648908	-0.826736	0.408387	0.903228	-2.1658	0.509991	-4.24674	2.16903e-05	0.00048953	SNAI3-AS1
ENSG00000144867	1.19002	0.427457	2.78396	0.00537	0.0542636	-0.717041	0.48036	-1.49272	0.135512	0.723037	0.516206	0.504614	1.02297	0.306321	0.53835	SRPRB
ENSG00000198888	-2.01345	0.723401	-2.78331	0.00538067	0.0543168	0.114329	0.74113	0.154263	0.877402	0.990789	-1.85742	0.837742	-2.21717	0.0266115	0.105694	MT-ND1
ENSG00000113369	1.57433	0.565737	2.78279	0.00538928	0.0543589	0.768339	0.461789	1.66383	0.0961459	0.668418	2.38332	0.597226	3.99066	6.58909e-05	0.00119845	ARRDC3
ENSG00000066230	1.14582	0.411762	2.78272	0.00539046	0.0543589	-0.816926	0.529146	-1.54386	0.122623	0.701963	0.37587	0.400442	0.938636	0.347917	0.580449	SLC9A3
ENSG00000157502	-3.84695	1.38302	-2.78156	0.00540982	0.0545258	0.359029	1.28208	0.280036	0.77945	0.982232	-3.44816	1.0945	-3.15044	0.00163024	0.0135025	PWWP3B
ENSG00000006071	-1.82137	0.654994	-2.78074	0.0054235	0.0546353	-0.999537	0.386203	-2.58811	0.0096504	0.282758	-2.77301	0.729046	-3.80362	0.000142599	0.00218166	ABCC8
ENSG00000229657	-2.52155	0.906898	-2.78041	0.00542904	0.0546477	1.77182	0.826555	2.14362	0.0320636	0.493241	-0.699935	1.19165	-0.587368	0.556957	0.752438	AL391822.1
ENSG00000248527	-2.21896	0.798093	-2.78033	0.00543037	0.0546477	0.161626	0.773848	0.20886	0.834557	0.985687	-2.01591	0.899975	-2.23996	0.0250932	0.101121	MTATP6P1
ENSG00000119280	-1.38034	0.496542	-2.77991	0.00543738	0.0546899	-0.284038	0.675815	-0.420289	0.674274	0.966807	-1.62101	0.525819	-3.08283	0.00205043	0.0160442	C1orf198
ENSG00000235316	-1.37321	0.494063	-2.77943	0.00544545	0.0547017	0.289921	0.520711	0.556778	0.577679	0.949006	-1.04427	0.616907	-1.69275	0.0905031	0.246552	DUSP8P5
ENSG00000165819	0.972627	0.349949	2.77934	0.0054469	0.0547017	-0.273656	0.424242	-0.645047	0.518897	0.939498	0.745884	0.407643	1.82975	0.0672873	0.201388	METTL3
ENSG00000105227	-1.83388	0.659825	-2.77934	0.00544703	0.0547017	0.288653	0.767271	0.376208	0.706762	0.971503	-1.49082	0.586975	-2.53983	0.0110907	0.0555292	PRX
ENSG00000256193	-4.21561	1.51744	-2.77811	0.0054676	0.0548231	-0.920158	2.46114	-0.373875	0.708497	0.971752	-5.08497	1.18162	-4.30338	NaN	NaN	LINC00507
ENSG00000075568	0.86546	0.311508	2.77829	0.00546461	0.0548231	0.0530982	0.334841	0.158577	0.874002	0.990635	0.962042	0.344639	2.79145	0.00524726	0.0320071	TMEM131
ENSG00000146530	-2.65261	0.954785	-2.77822	0.00546568	0.0548231	2.2515	1.18821	1.89486	0.0581109	0.586439	-0.373123	1.32948	-0.280654	0.778976	NaN	VWDE
ENSG00000111490	-1.44313	0.519527	-2.77778	0.00547323	0.0548512	-0.0772447	0.550054	-0.140431	0.888319	0.990789	-1.4721	0.504222	-2.91955	0.00350532	0.0238632	TBC1D30
ENSG00000186479	-2.74392	0.987896	-2.77754	0.00547726	0.0548632	-0.491775	1.04602	-0.470139	0.638255	0.962186	-3.18031	0.712969	-4.46065	8.17106e-06	0.000223779	RGS7BP
ENSG00000069399	1.68795	0.607884	2.77677	0.00549017	0.0549641	0.74087	0.558085	1.32752	0.184336	0.776597	2.47384	0.630859	3.92138	8.80431e-05	0.00149603	BCL3
ENSG00000135423	-2.73	0.983288	-2.7764	0.00549645	0.0549985	-0.000465039	1.00083	-0.000464656	0.999629	0.99991	-2.6822	0.851467	-3.1501	0.00163216	0.0135077	GLS2
ENSG00000162105	-1.84903	0.666119	-2.77583	0.00550605	0.0550662	-1.37294	0.699688	-1.96223	0.0497363	0.560943	-3.16726	0.438754	-7.21876	5.24652e-13	1.96652e-10	SHANK2
ENSG00000238164	-2.20034	0.792792	-2.77543	0.0055129	0.0551063	2.05373	0.877387	2.34073	0.019246	0.395026	-0.107512	0.976946	-0.110049	0.912371	NaN	TNFRSF14-AS1
ENSG00000137857	-3.17404	1.14378	-2.77505	0.00551924	0.0551412	2.76521	0.927236	2.98221	0.00286178	0.150315	-0.297967	1.35491	-0.219917	0.825936	0.916368	DUOX1
ENSG00000182667	-1.41918	0.51147	-2.7747	0.00552518	0.0551721	-0.267288	0.359599	-0.743295	0.457303	0.922257	-1.64163	0.573711	-2.86142	0.00421746	0.0274595	NTM
ENSG00000136854	-2.24234	0.808425	-2.77371	0.00554208	0.0553124	-0.0637363	0.824774	-0.0772774	0.938403	0.994037	-2.25125	0.661706	-3.40219	0.000668488	0.00701748	STXBP1
ENSG00000101412	1.37759	0.4967	2.77349	0.00554592	0.0553222	-0.117319	0.501041	-0.23415	0.814869	0.984454	1.30913	0.614104	2.13177	0.0330254	0.122848	E2F1
ENSG00000284966	-2.45102	0.884458	-2.77121	0.0055848	0.0556814	2.15257	1.00725	2.13706	0.0325928	0.494127	-0.136865	1.39963	-0.0977861	0.922102	NaN	AL138689.2
ENSG00000184414	-3.21889	1.16173	-2.77076	0.00559252	0.0557297	1.95512	1.06424	1.8371	0.0661947	0.611491	-1.23532	1.08289	-1.14077	0.253966	NaN	IRS3P
ENSG00000130147	0.874254	0.315549	2.77058	0.00559567	0.0557324	-0.588267	0.441963	-1.33103	0.183178	0.776108	0.334154	0.423388	0.789239	0.429973	0.655744	SH3BP4
ENSG00000250012	-1.48205	0.53525	-2.7689	0.00562464	0.0559922	-0.126358	0.566444	-0.223073	0.823479	0.984665	-1.56555	0.610357	-2.56497	0.0103184	0.0528104	AC079848.1
ENSG00000172247	-2.29178	0.827931	-2.76808	0.00563869	0.0561032	-1.15075	0.783935	-1.46792	0.142126	0.732018	-3.38864	0.695537	-4.87197	1.10489e-06	4.76774e-05	C1QTNF4
ENSG00000165810	-2.58862	0.935407	-2.76738	0.00565096	0.0561101	0.585329	0.669581	0.874172	0.382024	0.895117	-1.97296	1.17787	-1.67502	0.0939296	0.252882	BTNL9
ENSG00000139219	3.40837	1.23155	2.76755	0.00564792	0.0561101	-0.867006	1.26258	-0.686697	0.492274	NaN	2.61389	1.24789	2.09465	0.0362025	0.130673	COL2A1
ENSG00000102349	-2.86517	1.03521	-2.76772	0.00564494	0.0561101	0.269695	0.95124	0.283519	0.776779	0.982232	-2.57052	0.844685	-3.04317	0.00234101	0.0176616	KLF8
ENSG00000231690	-2.09398	0.756624	-2.76752	0.00564839	0.0561101	-0.133238	0.629827	-0.211547	0.832461	0.985519	-2.19221	0.72501	-3.02369	0.0024971	0.018576	LINC00574
ENSG00000151690	-1.75479	0.634198	-2.76695	0.00565839	0.0561551	0.0368416	0.556198	0.0662381	0.947188	0.994869	-1.66743	0.623223	-2.6755	0.00746186	0.0415378	MFSD6
ENSG00000118707	1.52507	0.551293	2.76635	0.00566877	0.0562294	0.020415	0.66885	0.0305226	0.97565	0.997418	1.59418	0.639401	2.49323	0.0126586	0.0614634	TGIF2
ENSG00000247092	1.2879	0.465816	2.76483	0.00569521	0.0564627	-0.76345	0.444419	-1.71786	0.0858217	0.6481	0.568253	0.51816	1.09667	0.272784	0.502654	SNHG10
ENSG00000152969	-3.05545	1.10554	-2.76376	0.00571396	0.0566196	-0.515921	0.80025	-0.644699	0.519122	0.939498	-3.52143	1.05445	-3.33959	0.000839021	0.00825887	JAKMIP1
ENSG00000158748	-3.52739	1.27691	-2.76245	0.00573698	0.0567896	-0.254225	1.09736	-0.231668	0.816796	0.984454	-3.70867	0.975766	-3.80078	0.000144242	0.00219883	HTR6
ENSG00000099866	-1.58892	0.575151	-2.76261	0.00573412	0.0567896	-0.103725	0.49757	-0.208463	0.834868	0.985687	-1.64781	0.630195	-2.61476	0.00892905	0.0475188	MADCAM1
ENSG00000100439	0.988792	0.358035	2.76172	0.00574978	0.056885	-1.22007	0.65593	-1.86007	0.062876	0.601831	-0.180216	0.625697	-0.288024	0.773328	0.888825	ABHD4
ENSG00000186453	-1.3585	0.491933	-2.76157	0.00575248	0.056885	0.905258	0.6751	1.34092	0.179945	0.774297	-0.420306	0.734816	-0.571988	0.56733	0.759005	FAM228A
ENSG00000155265	-2.43587	0.882254	-2.76097	0.00576303	0.0569312	-0.715888	0.75793	-0.94453	0.344899	0.880221	-3.09097	0.752659	-4.10674	4.01281e-05	0.000802394	GOLGA7B
ENSG00000186472	-3.24456	1.17511	-2.76107	0.00576127	0.0569312	-0.452246	0.887851	-0.509371	0.610492	0.956567	-3.65264	1.32696	-2.75264	0.00591164	0.0347928	PCLO
ENSG00000113263	2.10713	0.763464	2.75997	0.00578074	0.0570771	0.750898	1.20108	0.625185	0.531849	NaN	2.99922	1.01327	2.95993	0.00307712	0.0217331	ITK
ENSG00000204177	-1.21617	0.440684	-2.75973	0.00578493	0.0570894	-0.192789	0.445896	-0.432363	0.665478	0.966563	-1.3685	0.414743	-3.29964	0.000968081	0.00922064	BMS1P1
ENSG00000062716	1.7287	0.626455	2.7595	0.00578898	0.0571002	0.359209	0.354397	1.01358	0.310784	0.863315	2.12941	0.686886	3.10009	0.00193459	0.0153642	VMP1
ENSG00000130589	1.511	0.547637	2.75912	0.00579573	0.0571327	0.452108	0.627017	0.721046	0.470881	0.92574	2.00773	0.629638	3.1887	0.00142915	0.0122888	HELZ2
ENSG00000242220	-1.92416	0.697416	-2.75898	0.00579817	0.0571327	0.656565	0.67129	0.978065	0.328042	0.87092	-1.23538	0.927761	-1.33157	0.183003	0.391856	TCP10L
ENSG00000100258	0.892625	0.32367	2.75782	0.00581883	0.0573072	-0.160967	0.390561	-0.412142	0.680235	0.967505	0.776405	0.348043	2.23078	0.025696	0.102892	LMF2
ENSG00000142089	1.05328	0.382018	2.75714	0.00583101	0.057398	1.06532	0.433821	2.45567	0.0140622	0.343499	2.16726	0.347127	6.24342	4.28097e-10	6.3438e-08	IFITM3
ENSG00000116983	-3.18237	1.15455	-2.75639	0.00584441	0.0575007	-0.688833	0.915145	-0.752704	0.451628	0.918041	-3.81429	1.08957	-3.50072	0.000464001	0.00528281	HPCAL4
ENSG00000060688	0.749516	0.271946	2.75612	0.00584922	0.0575188	0.345943	0.386898	0.894145	0.371244	0.890274	1.13515	0.320565	3.5411	0.000398466	0.00472524	SNRNP40
ENSG00000181072	-3.63698	1.31971	-2.75589	0.00585327	0.0575294	-0.375762	1.22129	-0.307678	0.758328	0.981201	-4.00796	0.882281	-4.54272	5.55317e-06	0.000166647	CHRM2
ENSG00000279819	-1.76416	0.64038	-2.75486	0.00587178	0.0576276	0.539628	0.697971	0.773138	0.439441	0.914973	-1.18053	0.741129	-1.59288	0.111186	0.282264	AL390318.1
ENSG00000214944	-1.78418	0.647618	-2.75499	0.00586934	0.0576276	0.209379	0.654814	0.319753	0.749156	0.97856	-1.53502	0.726	-2.11435	0.0344856	0.12658	ARHGEF28
ENSG00000128606	1.55956	0.566138	2.75473	0.005874	0.0576276	0.317169	0.535346	0.592456	0.553546	0.946089	1.92087	0.591714	3.24628	0.00116926	0.0105831	LRRC17
ENSG00000154864	-2.58672	0.939032	-2.75467	0.00587515	0.0576276	2.39652	0.861445	2.78197	0.00540296	0.21031	-0.140254	0.799715	-0.17538	0.860781	0.934129	PIEZO2
ENSG00000255769	-1.56347	0.567638	-2.75435	0.00588091	0.0576549	0.0221792	0.674094	0.0329023	0.973752	0.997418	-1.49988	0.564222	-2.65831	0.00785326	0.0430522	GOLGA2P10
ENSG00000112029	1.96511	0.713708	2.75339	0.00589819	0.0577951	0.150335	0.709705	0.211827	0.832242	0.985507	2.15784	0.630816	3.42071	0.00062459	0.006657	FBXO5
ENSG00000286532	-1.93979	0.704636	-2.7529	0.00590696	0.0578518	-0.252725	0.544561	-0.464089	0.642584	0.96361	-2.14569	0.701857	-3.05716	0.00223442	0.0170716	PARTICL
ENSG00000145741	0.769081	0.279463	2.752	0.00592331	0.0579241	-0.297833	0.367499	-0.810431	0.417692	0.904994	0.520903	0.326874	1.59359	0.111029	0.282163	BTF3
ENSG00000108797	-1.36426	0.495724	-2.75205	0.00592232	0.0579241	0.0815752	0.602182	0.135466	0.892243	0.990938	-1.2409	0.478826	-2.59156	0.00955426	0.0500656	CNTNAP1
ENSG00000100626	-1.50254	0.54592	-2.75231	0.00591769	0.0579241	-0.834068	0.589605	-1.41462	0.157179	0.752326	-2.2879	0.682911	-3.35022	0.000807464	0.00803513	GALNT16
ENSG00000130787	-0.953556	0.346553	-2.75155	0.00593147	0.0579747	-0.216862	0.439173	-0.493797	0.621449	0.958084	-1.12022	0.474517	-2.36077	0.0182371	0.0810837	HIP1R
ENSG00000215146	-3.47982	1.26508	-2.75067	0.00594732	0.0581003	-0.322609	1.16763	-0.276294	0.782322	0.98269	-3.99883	0.866813	-4.61326	3.96405e-06	0.000126506	BX322639.1
ENSG00000174007	-1.10809	0.402908	-2.75023	0.00595541	0.05815	0.0596865	0.452446	0.13192	0.895048	0.991349	-1.01029	0.462446	-2.18468	0.0289126	0.111813	CEP19
ENSG00000168959	-3.36325	1.22306	-2.74986	0.00596212	0.0581862	-0.968934	1.04405	-0.928057	0.353378	0.883039	-4.27384	1.08802	-3.92809	8.56245e-05	0.00146522	GRM5
ENSG00000132603	1.01726	0.370039	2.74906	0.00597666	0.0582988	-0.265806	0.432887	-0.614032	0.539194	0.943157	0.803368	0.377706	2.12697	0.0334229	0.123746	NIP7
ENSG00000166762	-1.81359	0.659976	-2.74796	0.00599671	0.0583768	0.254504	0.808358	0.314841	0.752882	0.979882	-1.51422	0.847567	-1.78655	0.0740098	0.21488	CATSPER2
ENSG00000001561	-2.35902	0.858449	-2.748	0.00599591	0.0583768	-0.402079	0.594799	-0.675992	0.499046	0.932076	-2.70687	0.875466	-3.09192	0.00198869	0.0156896	ENPP4
ENSG00000224616	-2.07242	0.754155	-2.74801	0.00599591	0.0583768	1.51131	0.76556	1.97412	0.0483677	0.556924	-0.528578	0.643525	-0.821379	0.41143	0.639891	RTCA-AS1
ENSG00000259479	1.21609	0.442474	2.74838	0.00598909	0.0583768	-1.98766	0.555256	-3.57972	0.000343961	0.0427501	-0.722889	0.552553	-1.30827	0.190782	0.402404	SORD2P
ENSG00000037897	1.28247	0.466833	2.74717	0.00601121	0.0584006	-0.181441	0.590156	-0.307446	0.758504	0.981201	1.14121	0.488498	2.33617	0.0194824	0.0847875	METTL1
ENSG00000133816	-2.23198	0.812395	-2.74741	0.00600679	0.0584006	0.118124	0.873997	0.135153	0.892491	0.990938	-2.06363	0.751345	-2.74658	0.00602205	0.0353121	MICAL2
ENSG00000112473	0.882478	0.321174	2.74766	0.00600221	0.0584006	-0.356229	0.383426	-0.929069	0.352853	0.883039	0.574388	0.387215	1.48338	0.137973	0.3261	SLC39A7
ENSG00000063127	-2.49919	0.909684	-2.74732	0.00600848	0.0584006	1.21576	0.872985	1.39264	0.163727	0.758803	-1.27839	1.07897	-1.18482	0.236087	NaN	SLC6A16
ENSG00000279608	-1.28421	0.467557	-2.74664	0.006021	0.0584665	0.600754	0.453675	1.32419	0.185438	0.777302	-0.648083	0.535558	-1.21011	0.226238	0.448673	AL353795.3
ENSG00000022567	-1.94776	0.709217	-2.74635	0.00602618	0.0584874	0.0687321	0.771944	0.0890377	0.929052	0.993516	-1.82473	0.478898	-3.81026	0.000138818	0.00213831	SLC45A4
[truncated: 58,612 more rows]
