# Supplementary material for: Potential Diagnostic Value of the Differential Expression of Histone H3 Variants between Low- and High-Grade Gliomas
Source: Cancers (Basel). 2021 Oct 20;13(21):5261. doi: 10.3390/cancers13215261 (PMC8582563; doi:10.3390/cancers13215261)
Supplement: Supplementary file 1 [file cancers-13-05261-s001.zip › Table S4.xlsx]

## Sheet: Hoja1
Table S4. Somatic mutations in the histone H3 encoding genes (TCGA database).
		Lower grade glioma		Glioblastoma
		Number	Affected aa	Number	Affected aa
HIST1H3	A	0		0
	B	1	E134Q	0
	C	1	R54H	0
	D	0		1	T119A
	E	0		0
	F	0		5	A25V, D78H, L66Q, R64H, R73L
	G	0		2	F85C, I75I
	H	0		1	P39T
	I	1	R129C	1	T119A
	J	0		1	R41Tfs*49
HIST2H3	A	0		0
	C	0		0
	D	1	P122P	1	T4S
	PS2	0		0
H3F3	A	5	G35R, K28M, Q6Q, R130H, R3C	3	G35R (x2), G35V
	B	0		0
	C	2	R128H, R49*	3	L109M, R52H, T58T
*, stop codon; fs, frameshift
